# Supplementary material for: Role of endoscopic ultrasonography in the diagnostic work-up of idiopathic acute pancreatitis (PICUS): study protocol for a nationwide prospective cohort study
Source: PubMed Central journal article supplement (PMC7440829; doi:10.1136/bmjopen-2019-035504), 2020-08-20
Supplement: bmjopen-2019-035504.draft_revisions.pdf [file bmjopen-2019-035504.draft_revisions.pdf]

# BMJ Open

BMJ Open is committed to open peer review. As part of this commitment we make the peer review history of every article we publish publicly available.

When an article is published we post the peer reviewers' comments and the authors' responses online. We also post the versions of the paper that were used during peer review. These are the versions that the peer review comments apply to.

The versions of the paper that follow are the versions that were submitted during the peer review process. They are not the versions of record or the final published versions. They should not be cited or distributed as the published version of this manuscript.

BMJ Open is an open access journal and the full, final, typeset and author-corrected version of record of the manuscript is available on our site with no access controls, subscription charges or pay-per-view fees (<http://bmjopen.bmj.com>).

If you have any questions on BMJ Open's open peer review process please email [info.bmjopen@bmj.com](mailto:info.bmjopen@bmj.com)

# BMJ Open

## The role of endoscopic ultrasonography in the diagnostic work-up of idiopathic acute pancreatitis (PICUS): study protocol for a nationwide prospective cohort study

|                               |                                                                                                                                                                                                                                                                                                                                                                                                                                                                                                                                                                                                                                                                                                                                                                                                                                                                                                                                                                                                                                                                                                                                                                                                                                                                                                                                                                                                                                                                                                                                                                                                                                                                                                                                                                                                                                                                                                      |
|-------------------------------|------------------------------------------------------------------------------------------------------------------------------------------------------------------------------------------------------------------------------------------------------------------------------------------------------------------------------------------------------------------------------------------------------------------------------------------------------------------------------------------------------------------------------------------------------------------------------------------------------------------------------------------------------------------------------------------------------------------------------------------------------------------------------------------------------------------------------------------------------------------------------------------------------------------------------------------------------------------------------------------------------------------------------------------------------------------------------------------------------------------------------------------------------------------------------------------------------------------------------------------------------------------------------------------------------------------------------------------------------------------------------------------------------------------------------------------------------------------------------------------------------------------------------------------------------------------------------------------------------------------------------------------------------------------------------------------------------------------------------------------------------------------------------------------------------------------------------------------------------------------------------------------------------|
| Journal:                      | <i>BMJ Open</i>                                                                                                                                                                                                                                                                                                                                                                                                                                                                                                                                                                                                                                                                                                                                                                                                                                                                                                                                                                                                                                                                                                                                                                                                                                                                                                                                                                                                                                                                                                                                                                                                                                                                                                                                                                                                                                                                                      |
| Manuscript ID                 | bmjopen-2019-035504                                                                                                                                                                                                                                                                                                                                                                                                                                                                                                                                                                                                                                                                                                                                                                                                                                                                                                                                                                                                                                                                                                                                                                                                                                                                                                                                                                                                                                                                                                                                                                                                                                                                                                                                                                                                                                                                                  |
| Article Type:                 | Protocol                                                                                                                                                                                                                                                                                                                                                                                                                                                                                                                                                                                                                                                                                                                                                                                                                                                                                                                                                                                                                                                                                                                                                                                                                                                                                                                                                                                                                                                                                                                                                                                                                                                                                                                                                                                                                                                                                             |
| Date Submitted by the Author: | 04-Nov-2019                                                                                                                                                                                                                                                                                                                                                                                                                                                                                                                                                                                                                                                                                                                                                                                                                                                                                                                                                                                                                                                                                                                                                                                                                                                                                                                                                                                                                                                                                                                                                                                                                                                                                                                                                                                                                                                                                          |
| Complete List of Authors:     | <p>Umans, Devica; Amsterdam University Medical Centres, Department of Gastroenterology and Hepatology; Saint Antonius Hospital, Research and Development<br/> Timmerhuis, Hester; Saint Antonius Hospital, Department of Surgery; Saint Antonius Hospital, Research and Development<br/> Hallensleben, Nora ; Erasmus Medical Center, Department of Gastroenterology and Hepatology; Saint Antonius Hospital, Research and Development<br/> Bouwense, Stefan; Maastricht UMC+, Department of Surgery<br/> Anten, Marie-Paule; Franciscus Gasthuis en Vlietland, Department of Gastroenterology and Hepatology<br/> Bhalla, Abha; HagaZiekenhuis, Department of Gastroenterology and Hepatology<br/> Bijlsma, Rina; Martini Ziekenhuis, Department of Gastroenterology and Hepatology<br/> Boermeester, Marja; Amsterdam University Medical Centres, Department of Surgery<br/> Brink, Menno; Meander MC, Department of Gastroenterology and Hepatology<br/> Hol, Lieke; Maasstad Hospital, Department of Gastroenterology and Hepatology<br/> Bruno, Marco; Erasmus Medical Center, Department of Gastroenterology and Hepatology<br/> Curvers, Wouter; Catharina Hospital, Department of Gastroenterology and Hepatology<br/> van Dullemen, Hendrik; UMCG, Department of Gastroenterology and Hepatology<br/> van Eijck, Brechje; Spaarne Gasthuis, Department of Gastroenterology and Hepatology<br/> Erkelens, G; Gelre Ziekenhuizen, Department of Gastroenterology and Hepatology<br/> Fockens, Paul; Amsterdam University Medical Centres, Department of Gastroenterology and Hepatology<br/> van Geenen, Erwin; Radboudumc<br/> Hazen, Wouter; Elisabeth-TweeSteden Ziekenhuis, Department of Gastroenterology and Hepatology<br/> Hoge, Chantal; Maastricht UMC+, Department of Gastroenterology and Hepatology<br/> Inderson, Akin; LUMC, Department of Gastroenterology and Hepatology</p> |

|           |                                                                                                                                                                                                                                                                                                                                                                                                                                                                                                                                                                                                                                                                                                                                                                                                                                                                                                                                                                                                                                                                                                                                                                                                                                                                                                                                                                                                                                                                                                                                                                                                                               |
|-----------|-------------------------------------------------------------------------------------------------------------------------------------------------------------------------------------------------------------------------------------------------------------------------------------------------------------------------------------------------------------------------------------------------------------------------------------------------------------------------------------------------------------------------------------------------------------------------------------------------------------------------------------------------------------------------------------------------------------------------------------------------------------------------------------------------------------------------------------------------------------------------------------------------------------------------------------------------------------------------------------------------------------------------------------------------------------------------------------------------------------------------------------------------------------------------------------------------------------------------------------------------------------------------------------------------------------------------------------------------------------------------------------------------------------------------------------------------------------------------------------------------------------------------------------------------------------------------------------------------------------------------------|
|           | <p>Kager, Liesbeth; Noordwest Ziekenhuisgroep, Department of Gastroenterology and Hepatology<br/>         Kuiken, Sjoerd; OLVG, Department of Gastroenterology and Hepatology<br/>         Perk, Lars; Medisch Centrum Haaglanden, Department of Gastroenterology and Hepatology<br/>         Poley, Jan-Werner<br/>         Quispel, Rutger; Reinier de Graaf Groep, Department of Gastroenterology and Hepatology<br/>         Römkens, Tessa; Jeroen Bosch Hospital, Department of Gastroenterology and Hepatology<br/>         van Santvoort, Hjalmar ; University Medical Center Utrecht; Saint Antonius Hospital, Department of Surgery<br/>         Tan, Adriaan; Canisius Wilhelmina Hospital, Department of Gastroenterology and Hepatology<br/>         Thijssen, Annemieke; Albert Schweitzer Ziekenhuis, Department of Gastroenterology and Hepatology<br/>         Venneman, Niels ; Medisch Spectrum Twente, Department of Gastroenterology and Hepatology<br/>         Vlegaar, Frank; Universitair Medisch Centrum Utrecht<br/>         Voorburg, Annet ; Diaconessenhuis Utrecht Zeist Doorn, Department of Gastroenterology and Hepatology<br/>         van Wanrooij, Roy; Amsterdam University Medical Centres, Department of Gastroenterology and Hepatology<br/>         Witteman, Ben; Ziekenhuis Gelderse Vallei, Department of Gastroenterology and Hepatology<br/>         Verdonk, Robert; Saint Antonius Hospital, Department of Gastroenterology and Hepatology<br/>         Besselink, Marc; Amsterdam University Medical Centres, Department of Surgery<br/>         van Hooft, Jeanin; AMC</p> |
| Keywords: | Endoscopy < GASTROENTEROLOGY, Hepatobiliary disease < GASTROENTEROLOGY, Pancreatic disease < GASTROENTEROLOGY                                                                                                                                                                                                                                                                                                                                                                                                                                                                                                                                                                                                                                                                                                                                                                                                                                                                                                                                                                                                                                                                                                                                                                                                                                                                                                                                                                                                                                                                                                                 |
|           |                                                                                                                                                                                                                                                                                                                                                                                                                                                                                                                                                                                                                                                                                                                                                                                                                                                                                                                                                                                                                                                                                                                                                                                                                                                                                                                                                                                                                                                                                                                                                                                                                               |

SCHOLARONE™  
Manuscripts

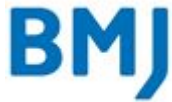

I, the Submitting Author has the right to grant and does grant on behalf of all authors of the Work (as defined in the below author licence), an exclusive licence and/or a non-exclusive licence for contributions from authors who are: i) UK Crown employees; ii) where BMJ has agreed a CC-BY licence shall apply, and/or iii) in accordance with the terms applicable for US Federal Government officers or employees acting as part of their official duties; on a worldwide, perpetual, irrevocable, royalty-free basis to BMJ Publishing Group Ltd ("BMJ") its licensees and where the relevant Journal is co-owned by BMJ to the co-owners of the Journal, to publish the Work in this journal and any other BMJ products and to exploit all rights, as set out in our [licence](#).

The Submitting Author accepts and understands that any supply made under these terms is made by BMJ to the Submitting Author unless you are acting as an employee on behalf of your employer or a postgraduate student of an affiliated institution which is paying any applicable article publishing charge ("APC") for Open Access articles. Where the Submitting Author wishes to make the Work available on an Open Access basis (and intends to pay the relevant APC), the terms of reuse of such Open Access shall be governed by a Creative Commons licence – details of these licences and which [Creative Commons](#) licence will apply to this Work are set out in our licence referred to above.

Other than as permitted in any relevant BMJ Author's Self Archiving Policies, I confirm this Work has not been accepted for publication elsewhere, is not being considered for publication elsewhere and does not duplicate material already published. I confirm all authors consent to publication of this Work and authorise the granting of this licence.

1  
2  
3  
4 1 The role of endoscopic ultrasonography in the diagnostic work-up of  
5  
6  
7 2 idiopathic acute pancreatitis (PICUS): study protocol for a nationwide  
8  
9  
10 3 prospective cohort study  
11  
12  
13  
14 4

15  
16 5 Devica S Umans<sup>1,2</sup>, Hester C Timmerhuis<sup>2,3</sup>, Nora DL Hallensleben<sup>2,4</sup>, Stefan A Bouwense<sup>5</sup>, Marie-Paule  
17  
18 6 GF Anten<sup>6</sup>, Abha Bhalla<sup>7</sup>, Rina A Bijlsma<sup>8</sup>, Marja A Boermeester<sup>9</sup>, Menno A Brink<sup>10</sup>, Lieke Hol<sup>11</sup>, Marco J  
19  
20 7 Bruno<sup>4</sup>, Wouter L Curvers<sup>12</sup>, Hendrik M van Dullemen<sup>13</sup>, Brechje C van Eijck<sup>14</sup>, G Willemien Erkelens<sup>15</sup>,  
21  
22 8 Paul Fockens<sup>1</sup>, Erwin JM van Geenen<sup>16</sup>, Wouter L Hazen<sup>17</sup>, Chantal V Hoge<sup>18</sup>, Akin Inderson<sup>19</sup>, Liesbeth  
23  
24 9 M Kager<sup>20</sup>, Sjoerd D Kuiken<sup>21</sup>, Lars E Perk<sup>22</sup>, Jan-Werner Poley<sup>4</sup>, Rutger Quispel<sup>23</sup>, Tessa EH Römken<sup>24</sup>,  
25  
26 10 Hjalmar C van Santvoort<sup>3,25</sup>, Adriaan CITL Tan<sup>26</sup>, Annemieke Y Thijssen<sup>27</sup>, Niels G Venneman<sup>28</sup>, Frank P  
27  
28 11 Vleggaar<sup>29</sup>, Annet MCJ Voorburg<sup>30</sup>, Roy LJ van Wanrooij<sup>31</sup>, Ben J Witteman<sup>32</sup>, Robert C Verdonk<sup>33</sup>, Marc  
29  
30 12 G Besselink<sup>8</sup>, Jeanin E van Hooft<sup>1</sup>, for the Dutch Pancreatitis Study Group  
31  
32  
33  
34  
35  
36  
37  
38  
39  
40  
41  
42  
43  
44  
45  
46  
47  
48  
49  
50  
51  
52  
53  
54  
55  
56  
57  
58  
59  
60

14 <sup>1</sup> Department of Gastroenterology and Hepatology, Amsterdam Gastroenterology and Metabolism, Amsterdam UMC,  
15 University of Amsterdam, Amsterdam, the Netherlands

16 <sup>2</sup> Department of Research and Development, St. Antonius Hospital, Nieuwegein, the Netherlands

17 <sup>3</sup> Department of Surgery, St. Antonius Hospital, Nieuwegein, the Netherlands

18 <sup>4</sup> Department of Gastroenterology and Hepatology, Erasmus Medical Center, Rotterdam, the Netherlands

19 <sup>5</sup> Department of Surgery, Maastricht UMC+, Maastricht, the Netherlands

20 <sup>6</sup> Department of Gastroenterology and Hepatology, Franciscus Gasthuis & Vlietland, Rotterdam, the Netherlands

21 <sup>7</sup> Department of Gastroenterology and Hepatology, Haga Hospital, Den Haag, the Netherlands

22 <sup>8</sup> Department of Gastroenterology and Hepatology, Martini Hospital, Groningen, the Netherlands

23 <sup>9</sup> Department of Surgery, Amsterdam UMC, University of Amsterdam, Amsterdam, the Netherlands

- 1  
2  
3 24 <sup>10</sup> Department of Gastroenterology and Hepatology, Meander Medical Center, Amersfoort, the Netherlands  
4  
5 25 <sup>11</sup> Department of Gastroenterology and Hepatology, Maasstad Hospital, Rotterdam, the Netherlands  
6  
7  
8 26 <sup>12</sup> Department of Gastroenterology and Hepatology, Catharina Hospital, Eindhoven, the Netherlands  
9  
10 27 <sup>13</sup> Department of Gastroenterology and Hepatology, University Medical Center Groningen, Groningen, the Netherlands  
11  
12  
13 28 <sup>14</sup> Department of Gastroenterology and Hepatology, Spaarne Gasthuis, Haarlem, the Netherlands  
14  
15 29 <sup>15</sup> Department of Gastroenterology and Hepatology, Gelre Hospital, Apeldoorn, the Netherlands  
16  
17  
18 30 <sup>16</sup> Department of Gastroenterology and Hepatology, Radboud university medical center, Nijmegen, the Netherlands  
19  
20 31 <sup>17</sup> Department of Gastroenterology and Hepatology, Elisabeth-Tweesteden Hospital, Tilburg, the Netherlands  
21  
22  
23 32 <sup>18</sup> Department of Gastroenterology and Hepatology, Maastricht University Medical Center, Maastricht, the Netherlands  
24  
25 33 <sup>19</sup> Department of Gastroenterology and Hepatology, Leiden University Medical Center, Leiden, the Netherlands  
26  
27  
28 34 <sup>20</sup> Department of Gastroenterology and Hepatology, Noordwest Ziekenhuisgroep, Alkmaar, the Netherlands  
29  
30 35 <sup>21</sup> Department of Gastroenterology and Hepatology, OLVG, Amsterdam, the Netherlands  
31  
32  
33 36 <sup>22</sup> Department of Gastroenterology and Hepatology, Medical Center Haaglanden, Den Haag, the Netherlands  
34  
35 37 <sup>23</sup> Department of Gastroenterology and Hepatology, Reinier de Graaf Gasthuis, Delft, the Netherlands  
36  
37  
38 38 <sup>24</sup> Department of Gastroenterology and Hepatology, Jeroen Bosch Hospital, Den Bosch, the Netherlands  
39  
40 39 <sup>25</sup> Department of Surgery, UMC Utrecht, Utrecht, the Netherlands  
41  
42  
43 40 <sup>26</sup> Department of Gastroenterology and Hepatology, Canisius-Wilhelmina Hospital, Nijmegen, the Netherlands  
44  
45 41 <sup>27</sup> Department of Gastroenterology and Hepatology, Albert Schweitzer Hospital, Dordrecht, the Netherlands  
46  
47  
48 42 <sup>28</sup> Department of Gastroenterology and Hepatology, Medisch Spectrum Twente, Enschede, the Netherlands  
49  
50 43 <sup>29</sup> Department of Gastroenterology and Hepatology, University Medical Center Utrecht, the Netherlands  
51  
52  
53 44 <sup>30</sup> Department of Gastroenterology and Hepatology, Diaconessenhuis, Utrecht, the Netherlands  
54  
55 45 <sup>31</sup> Department of Gastroenterology and Hepatology, Amsterdam Gastroenterology and Metabolism, Amsterdam UMC, Vrije  
56  
57 46 Universiteit van Amsterdam, Amsterdam, the Netherlands  
58  
59 47 <sup>32</sup> Department of Gastroenterology and Hepatology, Hospital Gelderse Vallei, Ede, the Netherlands  
60

1  
2  
3 48 <sup>33</sup> Department of Gastroenterology and Hepatology, St. Antonius Hospital, Nieuwegein, the Netherlands  
4  
5  
6 49  
7  
8 50 Correspondence  
9

10 51 Dr. Jeanin E. van Hooft, MD, PhD, MBA  
11  
12

13 52 Amsterdam UMC, location AMC  
14  
15

16 53 Department of Gastroenterology and Hepatology, C2-115  
17  
18

19 54 PO Box 22660  
20  
21

22 55 1100 DD Amsterdam  
23  
24

25 56 The Netherlands  
26  
27

28 57 Telephone: +31 20 566 7918  
29  
30

31 58 E-mail: [j.e.vanhooft@amc.nl](mailto:j.e.vanhooft@amc.nl)  
32  
33

34 59  
35

36 60 Correspondence during review phase  
37  
38

39 61 Devica S Umans  
40  
41

42 62 Telephone: +31 88 320 7051  
43  
44

45 63 E-mail: [d.s.umans@amsterdamumc.nl](mailto:d.s.umans@amsterdamumc.nl)  
46  
47

48 64  
49

50 65  
51  
52

53 66 List of abbreviations  
54  
55

56 67 ALT = alanine aminotransferase  
57  
58

59 68 BMI = body mass index  
60

1  
2  
3 69 CBD = common bile duct  
4  
5

6 70 CI = confidence interval  
7  
8

9 71 CRF = case report form  
10  
11

12 72 CT = computed tomography  
13  
14

15 73 ERCP = endoscopic retrograde cholangiopancreatography  
16  
17

18 74 EUS = endoscopic ultrasonography  
19  
20

21 75 IAP = idiopathic acute pancreatitis  
22  
23

24 76 IPMN = intraductal papillary mucinous neoplasm  
25  
26

27 77 IQR = interquartile range  
28  
29

30 78 MRCP = magnetic resonance cholangiopancreatography  
31  
32

33 79 MRI = magnetic resonance imaging  
34  
35

36 80  
37  
38

39 81  
40  
41

42 82 Word count  
43  
44

45 83 Word count excluding title page, abstract, tables, acknowledgements, contributions and references:  
46  
47

48 84 3534  
49  
50

51 85  
52  
53

54 86  
55  
56  
57  
58  
59  
60



1  
2  
3 87 **Abstract**  
4

5  
6 88 **Introduction**  
7

8 89 Idiopathic acute pancreatitis (IAP) remains a dilemma for physicians as it is uncertain whether patients  
9  
10 90 with IAP may actually have an occult etiology. It is unclear to what extent additional diagnostic  
11  
12 91 modalities such as endoscopic ultrasonography (EUS) are warranted after a first episode of IAP in order  
13  
14 92 to uncover this etiology. Failure to timely determine treatable etiologies delays appropriate treatment  
15  
16 93 and might subsequently cause recurrence of acute pancreatitis. Therefore, the aim of the PICUS study  
17  
18 94 is to determine the value of routine EUS in determining the etiology of pancreatitis in patients with a  
19  
20 95 first episode of IAP.  
21  
22  
23  
24  
25  
26  
27

28 97 **Methods and analysis**  
29

30 98 PICUS is designed as a multicenter prospective cohort study of 106 patients with a first episode of IAP  
31  
32 99 after complete standard diagnostic work-up, in whom a diagnostic EUS will be performed. Standard  
33  
34 100 diagnostic work-up will include a complete personal and family history, laboratory tests including  
35  
36 101 serum alanine aminotransferase, calcium and triglyceride levels, and imaging by transabdominal  
37  
38 102 ultrasound, magnetic resonance imaging or magnetic resonance cholangiopancreatography after  
39  
40 103 clinical recovery from the acute pancreatitis episode. The primary outcome measure is detection of  
41  
42 104 etiology by EUS. Secondary outcome measures include pancreatitis recurrence rate, severity of  
43  
44 105 recurrent pancreatitis, readmission, additional interventions, complications, length of hospital stay,  
45  
46 106 quality of life, mortality and costs, during a follow-up period of 12 months.  
47  
48  
49  
50  
51  
52  
53  
54  
55  
56  
57  
58  
59  
60

1  
2  
3 108 Ethics and dissemination  
4

5 109 PICUS is conducted according to the Declaration of Helsinki and Guideline for Good Clinical Practice.  
6

7  
8 110 Five Medical Ethics Review Committees assessed PICUS. The results will be submitted for publication  
9

10 111 in an international peer-reviewed journal.  
11  
12

13 112  
14

15  
16 113 Conclusion  
17

18 114 PICUS investigates the diagnostic yield of EUS in patients with a first episode of IAP and will determine  
19

20 115 whether routine EUS should be a part of the standard diagnostic work-up of a first episode of IAP.  
21  
22

23 116  
24  
25

26  
27 117 Trial registration  
28

29 118 Netherlands Trial Register: NL7066, June 9<sup>th</sup> 2018. Prospectively registered.  
30  
31

32 119  
33  
34

35 120  
36  
37

38 121 Article summary: strengths and limitations  
39

40 122 • The PICUS study investigates the diagnostic yield of endoscopic ultrasonography in patients  
41  
42 123 with a first episode of presumed idiopathic acute pancreatitis.  
43  
44

45 124 • This is the first prospective cohort studies of patients with a single episode of presumed IAP  
46  
47 125 after complete standard diagnostic work-up (including exclusion based on blood serum ALT  
48  
49 126 and imaging after clinical recovery).  
50

51  
52 127 • The results of the PICUS study will establish whether routine EUS should be incorporated in  
53  
54 128 the guidelines for standard diagnostic work-up after a first episode of presumed IAP.  
55  
56

57  
58 129  
59  
60

130

**131 Keywords**

132 Idiopathic acute pancreatitis; endoscopic ultrasonography, etiology

133

134

**135 Background**

136 Acute pancreatitis can be induced by numerous causes. Gallstone disease (approximately 50%) and  
137 alcohol (approximately 20%) are the most frequent causes (1-6), although the prevalence of etiologies  
138 of acute pancreatitis is dependent on, among other things, age and geographical factors (7-10). There  
139 is, however, a considerable group of patients of approximately 25% in whom no etiology can be found  
140 after routine diagnostic work-up (i.e. medical history, laboratory investigations and transabdominal  
141 ultrasound). These patients are considered to have presumed idiopathic acute pancreatitis (IAP) (3).

142 When IAP is presumed, guidelines recommend repeat transabdominal ultrasound after  
143 discharge (11, 12). This repeat ultrasonography has an additional diagnostic yield of 20% for the  
144 detection of gallstones or sludge in these patients (13). Undetected microlithiasis and biliary sludge  
145 are generally considered to be the major cause of presumed IAP (14, 15). Undetected and subsequently  
146 untreated gallstone disease poses a risk for recurrent acute pancreatitis and other biliary events, e.g.  
147 cholecystitis, biliary colic's and cholangitis.

148 Therefore, when previous diagnostics failed to uncover an etiology, endoscopic  
149 ultrasonography (EUS) should be considered for the detection of biliary disease or other abnormalities  
150 causing pancreatitis, such as neoplasms and chronic pancreatitis (11, 12, 16, 17). EUS is advised as the  
151 first step in presumed IAP, followed by (secretin-stimulated) magnetic resonance  
152 cholangiopancreaticography (MRCP) to identify rare morphologic abnormalities (11), as EUS is  
153 considered to have a higher diagnostic yield than MRCP for clinically relevant causes (18).

1  
2  
3 154 Although guidelines do recommend performing EUS after a first or second attack of presumed  
4  
5 155 IAP, this recommendation is scored as a mere grade 2C, according to the GRADE classification (19)  
6  
7 156 (indicating a weak recommendation based on evidence of low quality, with weak agreement among  
8  
9 157 experts in this field) (11). Therefore, EUS is not routinely performed as the exact significance in this  
10  
11 158 patient group is unclear (11, 16).

12  
13  
14  
15 159 The PICUS study was designed to determine whether routine EUS should be incorporated in  
16  
17 160 the standard diagnostic work-up of a first episode of presumed IAP.

18  
19  
20 161

21  
22  
23 162

## 24 25 26 163 **Methods and analysis**

### 27 28 29 164 **Study aim**

30  
31 165 The objective of this study is to determine the diagnostic yield of EUS for the detection of etiology in  
32  
33 166 patients with a first episode of presumed IAP.

34  
35  
36 167 Depending on the diagnostic yield of EUS observed in the PICUS study, incorporation of EUS  
37  
38 168 in routine diagnostic work-up of patients with a first episode of presumed IAP will be considered. A  
39  
40 169 minimal diagnostic yield of 10% for any etiology will be regarded as reasonable to justify implementing  
41  
42 170 routine EUS in the standard diagnostic work-up of a first episode of presumed IAP.

43  
44  
45  
46 171

### 47 48 49 172 **Study design and setting**

50  
51 173 PICUS is a multicenter prospective cohort study. A total of 106 patients will be included from 28  
52  
53 174 participating Dutch centers, including all 8 university centers and 20 large teaching hospitals. A listing  
54  
55 175 of the participating centers is included in the Authors' information. An overview of the study design,  
56  
57 176 including screening procedures and follow-up, is provided in figure 1.

177

## 178 Study population

179 The subjects of this study have had a first episode of acute pancreatitis, as defined by the 2012 Revised  
180 Atlanta criteria (20), with an unknown origin after standard diagnostic work-up, according to the 2013  
181 IAP/APA evidence-based guidelines on management of acute pancreatitis (11). The diagnostic  
182 modalities that constitute standard diagnostic work-up are listed in table 1. Potential etiologies and  
183 their definitions are listed in table 2.

184

## 185 Eligibility criteria

186 The inclusion criteria are:

- 187 1. Patients of 18 years or older
- 188 2. First episode of presumed IAP after standard diagnostic work-up
- 189 3. Informed consent for participation

190

191 The exclusion criteria are:

- 192 1. Known etiology
- 193 2. Chronic pancreatitis, as defined by the M-ANNHEIM criteria (21)
- 194 3. Recurrent pancreatitis
- 195 4. Altered anatomy which prohibits the endosonographer from visualizing the gall bladder, bile  
196 ducts, pancreas or pancreatic duct via EUS (e.g. gastric bypass surgery)
- 197 5. Diagnostic EUS aimed to determine etiology before inclusion

198

1  
2  
3 199 Endoscopic ultrasonography  
4

5 200 EUS will be performed in routine clinical practice by an endosonographer. Use of linear or radial EUS  
6  
7 201 will be at the discretion of the endosonographer. All Dutch endosonographers are trained to perform  
8  
9 202 EUS according to the technique of Hawes and Fockens (22).  
10  
11  
12

13 203 The endosonographer will systematically report, using a standardized Case Report Form (CRF),  
14  
15 204 the experience of the endosonographer, visualization of anatomical structures (i.e. gall bladder,  
16  
17 205 common bile duct (CBD) and pancreatic duct), presence of local complications of acute pancreatitis,  
18  
19 206 characteristics of biliary etiology (i.e. gallstones, microlithiasis and/or biliary sludge), characteristics of  
20  
21 207 chronic pancreatitis, presence of (a) pancreatic or peri-ampullary benign or malignant tumor(s),  
22  
23 208 characteristics of auto-immune pancreatitis, anatomic variations (e.g. pancreas divisum) or other  
24  
25 209 anomalies (e.g. cholecystitis, vascular, renal, splenic or hepatic anomalies or ascites), and performance  
26  
27 210 of fine needle aspiration or fine needle biopsy. Additionally, the type of endoscope, use of sedation,  
28  
29 211 procedure related complications and results of the fine needle aspiration or biopsy will be  
30  
31 212 systematically recorded by the study coordinator in a separate CRF.  
32  
33  
34  
35

36 213

37  
38  
39 214 Primary outcome measure  
40

41 215 The primary outcome measure is the number and ratio of patients with presumed IAP in whom EUS  
42  
43 216 detects a cause for the pancreatitis episode.  
44  
45

46 217 A positive EUS is defined as an EUS during which a definitive cause for the acute pancreatitis  
47  
48 218 episode has been found; or during which abnormalities are visualized constituting a definitive cause,  
49  
50 219 after obtaining tissue and pathological examination. An overview of the exact findings scored as  
51  
52 220 positive imaging is provided in table 3.  
53  
54  
55

56 221 If during EUS pancreatic abnormalities are found, yet not enough to make a certain diagnosis  
57  
58 222 of chronic pancreatitis according to the M-ANNHEIM classification (21), this imaging is considered to  
59  
60

1  
2  
3 223 be negative, even though it did show abnormalities. This approach is chosen because the aim of this  
4  
5 224 study is to determine the rate of which EUS can find a cause for the presumed IAP episode. For the  
6  
7 225 same reason, report of an anatomical abnormality during EUS after a first episode of acute pancreatitis  
8  
9  
10 226 is not scored as positive imaging as pancreatic morphological changes are very common in IAP and not  
11  
12 227 necessarily clinically relevant, as is elaborated on in the discussion (23).  
13  
14

15 228

### 18 229 Secondary outcome measures

19  
20 230 The secondary outcome measures are recurrence rate of acute pancreatitis, severity of recurrent  
21  
22 231 pancreatitis (20), readmission, performance of additional invasive procedures (e.g. cholecystectomy,  
23  
24 232 endoscopic sphincterotomy), complications of EUS and of additional interventions, according to the  
25  
26  
27 233 Clavien-Dindo classification (24), length of hospital stay, quality of life, mortality and costs. Relevant  
28  
29 234 definitions are reported in Additional File 2.  
30  
31

32 235

### 35 236 Sample size calculation

36  
37 237 The sample size calculation was based on the primary outcome measure, diagnostic yield of EUS. Based  
38  
39  
40 238 on two previous studies reporting yield in patients with a first episode of presumed IAP (25, 26),  
41  
42 239 adjusted for the PICUS study criteria for inclusion (i.e. requiring negative imaging after clinical  
43  
44 240 recovery) and for positive imaging (i.e. excluding pancreas divisum as etiology), diagnostic yield was  
45  
46 241 assumed to be 30%. Using a two-sided significance level ( $\alpha$ ) of 0.05, a power ( $1 - \beta$ ) of 80%, 95 patients  
47  
48 242 are needed to attain a 95% confidence interval (CI) with a range smaller than 10% above and below  
49  
50  
51 243 the assumed yield of 30% (95% CI: 20.8, 39.2). Assuming a drop-out rate of 10%, a total of 106 patients  
52  
53 244 will be included (27). The sample size was calculated using the software programs RStudio (28) and  
54  
55 245 nQuery (29).  
56  
57

58 246

1  
2  
3 247 Follow-up  
4

5 248 Data from patient records on primary and secondary outcome measures will be collected until 1 year  
6  
7 249 after inclusion. Outpatient care and follow-up after the EUS is at the discretion of the treating  
8  
9  
10 250 physician, but an outpatient clinic visit after EUS to discuss the results of the EUS and potential  
11  
12 251 subsequent appropriate treatment can be considered standard care.  
13  
14

15 252 In case of biliary disease, the patient will be considered for endoscopic retrograde  
16  
17 253 cholangiopancreatography (ERCP) with sphincterotomy when choledocho(-micro-)lithiasis or sludge  
18  
19 254 in the CBD is present, and cholecystectomy, as is standard care for biliary pancreatitis. A (secretin-  
20  
21 255 stimulated) MRCP will be recommended, if not performed earlier, if a patient is readmitted for a  
22  
23 256 recurrent episode of acute pancreatitis after a negative EUS for etiology, in order to rule out structural  
24  
25 257 anomalies such as pancreas divisum. This is in accordance with current guidelines (11).  
26  
27  
28

29 258 Patients will be asked to fill out the Short Form-36 questionnaire in the validated Dutch  
30  
31 259 translation on day 3 after inclusion, after 6 months and after 1 year.  
32  
33

34 260  
35

36  
37 261 Statistical aspects  
38

39 262 All included subjects will be evaluated for primary and secondary endpoints until 1 year after inclusion.  
40  
41 263 The primary analysis will be based on intention-to-treat principles. For exploratory reasons a per-  
42  
43 264 protocol analysis will be performed too.  
44  
45  
46

47 265 The intention-to-treat population comprises all patients included in the study, regardless of  
48  
49 266 adherence to study protocol. The per-protocol population is the subset of included patients who were  
50  
51 267 treated with the guidelines of the protocol. A tabular listing of all patients excluded from the intention-  
52  
53 268 to-treat population will be provided together with the reasons for exclusion.  
54  
55  
56  
57  
58  
59  
60



1  
2  
3 269 All analyses will be performed in SPSS for Microsoft Windows. All data handling and analysis  
4  
5 270 will be saved in a syntax-file. Results will be presented with all centers combined. A two-tailed p-value  
6  
7 271 of < 0.05 is considered statistically significant.  
8  
9

10 272

### 13 273 **Baseline variables**

15 274 The reported baseline characteristics consist of age, sex, body mass index (BMI), previous  
16 275 cholecystectomy, nicotine and alcohol use, severity of pancreatitis, length of hospital stay, amylase,  
17 276 lipase, C-reactive protein, alanine transaminase, calcium, albumin and triglycerides on admission,  
18 277 imaging modalities before EUS and their findings. Baseline characteristics of EUS will include timing of  
19 278 EUS, experience of endosonographer and type of sedation and type of endoscope used. Data will be  
20 279 presented in percentages or as mean with standard deviation, or in case of a skewed distribution as  
21 280 median with interquartile range (IQR).  
22  
23  
24  
25  
26  
27  
28  
29  
30

31 281

### 32 282 **Primary outcome measure: etiology detection rate**

33  
34  
35 283 Overall detection rate of an etiology for the episode of acute pancreatitis will be presented as  
36 284 percentage with a 95% CI. Predefined subgroup analyses will be made for patients with and without  
37 285 obesity (cut-off at a BMI of 30), a previous cholecystectomy, alcohol use and local complications from  
38 286 the IAP episode. A subgroup analysis will also be made for patients with a transabdominal ultrasound  
39 287 as imaging after clinical recovery and with magnetic resonance imaging (MRI) or MRCP as imaging after  
40 288 clinical recovery. Finally, a subgroup analysis will be made for EUS performed by endosonographers  
41 289 with and without extensive experience (cut-off at 400 endosonographies performed), use of linear or  
42 290 radial scope and type of sedation used. In subgroup analyses, the Chi-square test or the Fisher's exact  
43 291 test will be used, as appropriate, to compare etiology detection rate between subgroups. In subgroup  
44 292 analyses, comparability between groups regarding baseline variables will be checked. If the subgroups  
45  
46  
47  
48  
49  
50  
51  
52  
53  
54  
55  
56  
57  
58  
59  
60

1  
2  
3 293 differ statistically significantly in one or more baseline variables, this will be corrected in a logistic  
4  
5 294 regression analysis.  
6  
7

8 295  
9

10  
11 296 ***Secondary outcome measures***  
12

13  
14 297 Secondary outcome measures will be described as percentages with 95% CI, as mean with standard  
15  
16 298 deviation or median with IQR, as appropriate.  
17

18  
19 299 For recurrence rate, subgroup analyses will be made for patients with a positive and negative  
20  
21 300 EUS, and in patients with a positive EUS, for patients who were and were not treated adequately. The  
22  
23 301 same subgroup analyses as in the primary outcome measure, will also be applied on the recurrence  
24  
25 302 rate. The Chi-square test or the Fisher's exact test will be used for comparison between subgroups, as  
26  
27 303 appropriate.  
28  
29

30  
31 304 For quality of life, subgroup analyses will be made for baseline versus follow-up quality of life  
32  
33 305 and for patients with a positive and negative EUS, and with and without pancreatitis recurrence during  
34  
35 306 follow-up. The (un-)paired T-test, Wilcoxon signed rank test or the Mann-Whitney U test will be used  
36  
37 307 for comparisons between subgroups, as appropriate.  
38  
39

40  
41 308  
42

43  
44 309 ***Cost analysis***  
45

46 310 The cost analysis will comprise direct medical costs, which are generated by healthcare utilization and  
47  
48 311 include hospital admission periods and therapeutic and diagnostic procedures (30). Estimates of unit  
49  
50 312 costs will be based on Dutch reference data from the cost guide of the Dutch Health Council (31). If  
51  
52 313 this guide is an inappropriate determination of unit costs, the costs will be based on data provided by  
53  
54 314 two hospital administrations (one university center and one general hospital) to account for the actual  
55  
56 315 input of personnel, material and overhead over hospital resources used. Cost calculations will be used  
57  
58  
59  
60

1  
2  
3 316 to determine cost of interventions (surgical, endoscopic or radiological) and diagnostic imaging. The  
4  
5 317 cost analysis will be reported separately from the main study manuscript.  
6  
7

8 318

9  
10  
11 319 Patient and public involvement

12  
13  
14 320 The patient advocacy organization *Alvleesklievereniging Nederland* was involved in the design of the  
15  
16 321 PICUS study. The experience of the patient advocacy organization with IAP and participation in  
17  
18 322 scientific research has driven the research question and design of the study with regards to patient  
19  
20 323 burden. The patient advocacy organization will also be involved in the dissemination and  
21  
22 324 implementation of the study results.  
23

24  
25  
26 325 All patients eligible for participation will be asked to give written informed consent.  
27

28 326

29  
30  
31 327

32  
33  
34 328 Ethics and dissemination

35  
36  
37 329 The PICUS study is conducted according to the principles of the Declaration of Helsinki (October 2013)  
38  
39 330 and to the Guideline for Good Clinical Practice by the International Council for Harmonization  
40  
41 331 (November 9 2016).  
42

43  
44 332 The need for ethical approval was waived by the Medical Ethics Review Committee of the  
45  
46 333 Academic Medical Center on May 28, 2018 (W18\_161 # 18.199), by the Medical Research Ethics  
47  
48 334 Committee of the University Medical Center Utrecht on July 04, 2018 (18-469), by the Research Ethics  
49  
50 335 Committee of Radboud university medical center on July 23, 2018 (2018-4520), by the Medical Ethics  
51  
52 336 Review Committee of the Erasmus Medical Center on July 30, 2018 (MEC-2018-1293) and by the  
53  
54 337 Medical Ethics Review Committee of the Maastricht University Medical Center on September 7, 2018  
55  
56 338 (2018-0685). Before start of inclusion, local board approval will be obtained in all participating centers.  
57  
58  
59  
60

1  
2  
3 339 The results of the PICUS study will be submitted for publication in an international peer-  
4  
5 340 reviewed scientific journal, regardless of study outcomes.  
6  
7

8 341

10  
11 342

## 14 343 Discussion

16 344 Previous research has suggested that EUS might be beneficial in the detection of an etiology in  
18 345 presumed IAP. However, data lacks on the efficacy of routine EUS in patients with a first episode of  
20 346 presumed IAP, after repeat imaging after clinical recovery is negative for an etiology. The PICUS study  
22 347 aims to determine whether routine EUS is warranted in a first episode of acute pancreatitis where no  
24 348 cause could be disclosed after complete standard diagnostic work-up.

28 349 Currently, guidelines do not clearly define criteria for biliary origin (11). However, it is generally  
30 350 agreed upon that cholelithiasis, microlithiasis or biliary sludge constitute biliary etiology. Several  
32 351 previous studies have shown an association between elevated ALT levels and acute biliary pancreatitis  
34 352 (32-35), with a positive predictive value of 85% for an ALT > 150 U/L within 48 hours after onset of  
36 353 symptoms (11, 32, 33, 35). Therefore, an elevated blood serum ALT level at admission is considered to  
38 354 entail a high probability of biliary etiology, and pancreatitis with an elevated ALT is treated as being of  
40 355 biliary origin (32-34, 36). However, the majority of current literature on EUS did not exclude patients  
42 356 based on ALT level at admission (15, 25, 26, 32, 37-46). As these patients have a higher a priori chance  
44 357 of confirmation of biliary etiology on EUS, the etiology detection rate of EUS might be overestimated  
46 358 in these studies. In PICUS, biliary etiology is defined as either the signs of cholelithiasis, microlithiasis  
48 359 or biliary sludge on transabdominal ultrasonography, or transient elevation of the blood serum ALT  
50 360 level of more than twice the upper limit of normal at admission. By only including patients with normal  
52 361 or slightly elevated ALT levels at admission, the etiology detection rate as reported in PICUS will reflect  
54 362 the detection rate in patients who are truly considered as having presumed IAP after standard  
56 363 diagnostic work-up.

1  
2  
3 364 Current guidelines advise a repeat transabdominal ultrasound after clinical recovery in the  
4  
5 365 work-up of presumed IAP because the index transabdominal ultrasound is less sensitive during the  
6  
7 366 acute phase of pancreatitis. The subpar visualization of gall bladder, bile ducts and pancreas is often  
8  
9  
10 367 due to excessive amounts of air in the intestines caused by pancreatitis-induced ileus and/or  
11  
12 368 suboptimal cooperation of painful patients (47). After the first episode of acute pancreatitis, repeating  
13  
14 369 a transabdominal ultrasound may be able to detect biliary stones where it could not during index  
15  
16 370 admission (48). However, of the current literature on EUS in IAP, only a minority of studies included  
17  
18 371 repeat imaging in the diagnostic work-up before EUS (15, 40, 41, 43). Previous research has shown that  
19  
20 372 a repeat transabdominal ultrasound has a diagnostic yield of 20% in patients with a first episode of IAP  
21  
22 373 (13). Omitting repeat imaging from diagnostic work-up before EUS may lead to an overestimation of  
23  
24 374 the diagnostic yield of EUS. In PICUS, all patients are required to undergo imaging after clinical  
25  
26 375 recovery, i.e. transabdominal ultrasound or MRI/MRCP. Computed tomography (CT) is not considered  
27  
28 376 sufficient imaging as biliary disease, the most common underlying etiology in presumed IAP, cannot  
29  
30 377 always be adequately detected using CT.  
31  
32  
33  
34

35 378 It is well documented that the overall diagnostic yield of EUS in patients with recurrent  
36  
37 379 pancreatitis is superior to the diagnostic yield of both secretin-stimulated MRCP (s-MRCP) and non-  
38  
39 380 secretin-stimulated MRCP (18, 44, 46, 49). In the subgroup of patients with a pancreas divisum,  
40  
41 381 however, s-MRCP is considered to be superior in diagnostic yield to both EUS and MRCP (18). The role  
42  
43 382 of pancreas divisum in the etiology of pancreatitis is unclear. Epidemiological studies have shown that  
44  
45 383 the prevalence of pancreas divisum in the general population is equal to the prevalence in patients  
46  
47 384 with presumed IAP (23). In patients with a pancreas divisum and acute pancreatitis, potentially other  
48  
49 385 disease modifying factors add to the occurrence of pancreatitis, such as increased sensitivity to toxins  
50  
51 386 or genetic susceptibility. Because of this ambiguity, pancreas divisum in patients with a first episode  
52  
53 387 of acute pancreatitis is mostly left untreated in clinical practice. However, if patients with a pancreas  
54  
55 388 divisum present with multiple episodes of presumed IAP, the divisum is often considered to be related  
56  
57 389 to the pancreatitis and is subsequently treated, often with ERCP with endoscopic sphincterotomy,  
58  
59  
60

1  
2  
3 390 although evidence supporting this practice is limited (23). Because of both the diagnostic superiority  
4  
5 391 of EUS in recurrent pancreatitis as well as the lack of clinical consequences of (s-)MRCP in patients with  
6  
7 392 a first episode of pancreatitis, EUS is preferred to (s-)MRCP as the first choice for additional diagnostic  
8  
9  
10 393 testing for etiology in patients with presumed IAP (18, 44, 46, 49). Subsequently, current guidelines  
11  
12 394 advise performing MCRP in case of recurrent IAP after EUS fails to determine an etiology (11).  
13  
14 395 Therefore, in PICUS, we have chosen not to systematically include (s-)MRCP in the diagnostic work-up  
15  
16 396 before EUS of first episode IAP.

17  
18  
19 397 Current guidelines advise consideration of EUS after a first or second attack of IAP (11).  
20  
21  
22 398 However, there is a paucity of evidence on the efficacy of EUS in first episode IAP. Three previous  
23  
24 399 studies prospectively reported on EUS in patients with first episode IAP (25, 26, 38). However, in these  
25  
26 400 studies, patients were not excluded based on liver enzymes abnormalities suggestive of biliary disease  
27  
28 401 and no repeat imaging after clinical recovery was performed. PICUS will be the first prospective cohort  
29  
30 402 study in which EUS will be performed in patients with a first episode of IAP after complete standard  
31  
32 403 diagnostic work-up before EUS according to current guidelines (11).  
33  
34  
35

36 404 A diagnostic yield of 10% for any etiology will be considered reasonable to justify incorporating  
37  
38 405 routine EUS after a first episode of presumed IAP. This cut-off value was determined during a  
39  
40 406 multidisciplinary meeting of the Dutch Pancreatitis Study Group, which included the principal  
41  
42 407 investigators of several trials being executed by the Dutch Pancreatitis Study Group. Considering the  
43  
44 408 expectation that the majority of uncovered etiologies by EUS will be treatable (e.g. biliary disease) and  
45  
46 409 adequate treatment could prevent pancreatitis recurrence, while in a minority of uncovered etiologies  
47  
48 410 diagnosis before progression of disease might be crucial for prognosis (e.g. malignancy), a positive  
49  
50 411 result in 10% of patients was deemed sufficient to warrant routine EUS after a first episode of  
51  
52 412 presumed IAP.  
53  
54  
55

56  
57 413 In conclusion, the PICUS study is the first prospective cohort study of patients with a single  
58  
59 414 episode of presumed IAP after complete standard diagnostic work-up (including exclusion based on  
60

1  
2  
3 415 blood serum ALT and imaging after clinical recovery). The results of the PICUS study will establish  
4  
5 416 whether routine EUS should be incorporated in the guidelines for standard diagnostic work-up after a  
6  
7 417 first episode of presumed IAP.  
8  
9

10 418

11 419

## 12 13 14 15 16 420 Acknowledgements

17  
18  
19 421 The authors would like to acknowledge:

- 20  
21  
22 422 1. all of the members of the Dutch Pancreatitis Study Group, for their continuous efforts in  
23  
24 423 recruitment of patients,  
25  
26 424 2. dr. S. van Dieren, for providing her expertise in the calculation of the sample size,  
27  
28 425 3. dr. M. van der Vlugt, MD, PhD, for her willingness to act as independent physician for the PICUS  
29  
30 426 study, and  
31  
32 427 4. the pancreatic disease patient advocacy organization *Alvleeskliervereniging Nederland*, for  
33  
34 428 their effort in representing the perspective of (participating) patients during the study design.  
35  
36  
37

38 429

39 430

## 40 41 42 43 44 431 References

- 45  
46 432 1. Nesvaderani M, Eslick GD, Vagg D, Faraj S, Cox MR. Epidemiology, aetiology and outcomes of  
47  
48 433 acute pancreatitis: A retrospective cohort study. *Int J Surg*. 2015;23(Pt A):68-74.  
49  
50 434 2. van Brunschot S, van Grinsven J, van Santvoort HC, Bakker OJ, Besselink MG, Boermeester MA,  
51  
52 435 et al. Endoscopic or surgical step-up approach for infected necrotising pancreatitis: a multicentre  
53  
54 436 randomised trial. *The Lancet*. 2018;391(10115):51-8.  
55  
56  
57  
58  
59  
60

- 1  
2  
3 437 3. Bakker OJ, van Brunschot S, van Santvoort HC, Besselink MG, Bollen TL, Boermeester MA, et  
4  
5 438 al. Early versus on-demand nasoenteric tube feeding in acute pancreatitis. *N Engl J Med.*  
6  
7 439 2014;371(21):1983-93.  
8  
9  
10 440 4. Besselink MGH, van Santvoort HC, Buskens E, Boermeester MA, van Goor H, Timmerman HM,  
11  
12 441 et al. Probiotic prophylaxis in predicted severe acute pancreatitis: a randomised, double-blind,  
13  
14 442 placebo-controlled trial. *The Lancet.* 2008;371(9613):651-9.  
15  
16 443 5. Olaf J. Bakker M, Hjalmar C. van Santvoort M, PhD, Sandra van Brunschot M, Ronald B. Geskus  
17  
18 444 P, Marc G. Besselink M, PhD, Thomas L. Bollen M, et al. Endoscopic Transgastric vs Surgical  
19  
20 445 Necrosectomy for Infected Necrotizing Pancreatitis A Randomized Trial. *JAMA.* 2012;307(10):1053-61.  
21  
22  
23 446 6. Hjalmar C. van Santvoort MD, Marc G. Besselink, M.D., Ph.D., Olaf J. Bakker, M.D., H. Sijbrand  
24  
25 447 Hofker, M.D., Marja A. Boermeester, M.D., Ph.D., Cornelis H. Dejong, M.D., Ph.D., Harry van Goor,  
26  
27 448 M.D., Ph.D., Alexander F. Schaapherder, M.D., Ph.D., Casper H. van Eijck, M.D., Ph.D., Thomas L. Bollen,  
28  
29 449 M.D., Bert van Ramshorst, M.D., Ph.D., Vincent B. Nieuwenhuijs, M.D., Ph.D., Robin Timmer, M.D.,  
30  
31 450 Ph.D., Johan S. Laméris, M.D., Ph.D., Philip M. Kruyt, M.D., Eric R. Manusama, M.D., Ph.D., Erwin van  
32  
33 451 der Harst, M.D., Ph.D., George P. van der Schelling, M.D., Ph.D., Tom Karsten, M.D., Ph.D., Eric J.  
34  
35 452 Hesselink, M.D., Ph.D., Cornelis J. van Laarhoven, M.D., Ph.D., Camiel Rosman, M.D., Ph.D., Koop  
36  
37 453 Bosscha, M.D., Ph.D., Ralph J. de Wit, M.D., Ph.D., Alexander P. Houdijk, M.D., Ph.D., Maarten S. van  
38  
39 454 Leeuwen, M.D., Ph.D., Erik Buskens, M.D., Ph.D., and Hein G. Gooszen, M.D., Ph.D. A Step-up Approach  
40  
41 455 or Open Necrosectomy for Necrotizing Pancreatitis. *N Engl J Med.* 2010;362(16):1491-502.  
42  
43  
44 456 7. Sadr-Azodi O, Oskarsson V, Discacciati A, Videhult P, Askling J, Ekbom A. Pancreatic Cancer  
45  
46 457 Following Acute Pancreatitis: A Population-based Matched Cohort Study. *Am J Gastroenterol.*  
47  
48 458 2018;113(11):1711-9.  
49  
50  
51 459 8. Yamin Zheng M, Zhen Zhou, PhD, Haichao Li, BS Med, Jia Li, MD, Ang Li, MD, Binrong Ma, PhD,  
52  
53 460 Taiping Zhang, MD, Quan Liao, MD, Yingjiang Ye, MD, Zhongtao Zhang, MD, Yinmo Yang, MD, Zhenjun  
54  
55 461 Wang, MD, Zaixing Zhang, MD, Jinshan Yang, BS Med, and Fei Li, MD. A Multicenter Study on Etiology  
56  
57 462 of Acute Pancreatitis in Beijing During 5 Years. *Pancreas.* 2015;44:409-14.  
58  
59  
60



- 1  
2  
3 463 9. Zhu Y, Pan X, Zeng H, He W, Xia L, Liu P, et al. A Study on the Etiology, Severity, and Mortality  
4  
5 464 of 3260 Patients With Acute Pancreatitis According to the Revised Atlanta Classification in Jiangxi,  
6  
7 465 China Over an 8-Year Period. *Pancreas*. 2017;46(4):504-9.
- 9  
10 466 10. Roberts SE, Morrison-Rees S, John A, Williams JG, Brown TH, Samuel DG. The incidence and  
11  
12 467 aetiology of acute pancreatitis across Europe. *Pancreatology*. 2017;17(2):155-65.
- 13  
14 468 11. Working Group IAP/APA Acute Pancreatitis Guidelines. IAP/APA evidence-based guidelines for  
15  
16 469 the management of acute pancreatitis. *Pancreatology*. 2013;13(4 Suppl 2):e1-15.
- 17  
18  
19 470 12. Working Party of the British Society of G, Association of Surgeons of Great B, Ireland,  
20  
21 471 Pancreatic Society of Great B, Ireland, Association of Upper GI SoGB, et al. UK guidelines for the  
22  
23 472 management of acute pancreatitis. *Gut*. 2005;54 Suppl 3:iii1-9.
- 24  
25 473 13. Hallensleben ND, Umans DS, Bouwense S, Verdonk RC, Besselink MG, Van Hooft JE, et al. The  
26  
27 474 clinical course and diagnostic work-up of idiopathic acute pancreatitis, a post-hoc analysis of a  
28  
29 475 prospective multicenter observational cohort. *Digestive Disease Week; San Diego: Gastroenterology;*  
30  
31 476 2019. p. S-121.
- 32  
33  
34 477 14. Lee SP, Nicholls JF, Park HZ. Biliary Sludge as a Cause of Acute Pancreatitis. *N Engl J Med*.  
35  
36 478 1992;326:589-93.
- 37  
38  
39 479 15. Garg PK, Tandon RK, Madan K. Is biliary microlithiasis a significant cause of idiopathic recurrent  
40  
41 480 acute pancreatitis? A long-term follow-up study. *Clin Gastroenterol Hepatol*. 2007;5(1):75-9.
- 42  
43 481 16. Tenner S, Baillie J, DeWitt J, Vege SS, American College of G. American College of  
44  
45 482 Gastroenterology guideline: management of acute pancreatitis. *Am J Gastroenterol*.  
46  
47 483 2013;108(9):1400-15; 16.
- 48  
49  
50 484 17. Banks PA, Freeman ML, Practice Parameters Committee of the American College of G. Practice  
51  
52 485 guidelines in acute pancreatitis. *Am J Gastroenterol*. 2006;101(10):2379-400.
- 53  
54 486 18. Wan J, Ouyang Y, Yu C, Yang X, Xia L, Lu N. Comparison of EUS with MRCP in idiopathic acute  
55  
56 487 pancreatitis: a systematic review and meta-analysis. *Gastrointest Endosc*. 2018.
- 57  
58  
59  
60

- 1  
2  
3 488 19. Schünemann H BJ, Guyatt G, Oxman A, editors. GRADE handbook for grading quality of  
4  
5 489 evidence and strength of recommendations. Group TGW, editor 2013.  
6  
7 490 20. Banks PA, Bollen TL, Dervenis C, Gooszen HG, Johnson CD, Sarr MG, et al. Classification of acute  
8  
9 491 pancreatitis--2012: revision of the Atlanta classification and definitions by international consensus.  
10  
11 492 Gut. 2013;62(1):102-11.  
12  
13  
14 493 21. Schneider A, Lohr JM, Singer MV. The M-ANNHEIM classification of chronic pancreatitis:  
15  
16 494 introduction of a unifying classification system based on a review of previous classifications of the  
17  
18 495 disease. J Gastroenterol. 2007;42(2):101-19.  
19  
20  
21 496 22. Hawes RH, Fockens P. Endosonography. Second edition ed. Philadelphia: Elsevier Inc.; 2011.  
22  
23 497 23. DiMagno MJ, Wamsteker EJ. Pancreas divisum. Curr Gastroenterol Rep. 2011;13(2):150-6.  
24  
25 498 24. Dindo D, Demartines N, Clavien P-A. Classification of Surgical Complications. Annals of Surgery.  
26  
27 499 2004;240(2):205-13.  
28  
29  
30 500 25. Yusoff IF, Raymond G, Sahai AV. A prospective comparison of the yield of EUS in primary vs.  
31  
32 501 recurrent idiopathic acute pancreatitis. Gastrointest Endosc. 2004;60(5):673-8.  
33  
34 502 26. Vila JJ, Vicuna M, Irisarri R, de la Higuera BG, Ruiz-Clavijo D, Rodriguez-Gutierrez C, et al.  
35  
36 503 Diagnostic yield and reliability of endoscopic ultrasonography in patients with idiopathic acute  
37  
38 504 pancreatitis. Scand J Gastroenterol. 2010;45(3):375-81.  
39  
40  
41 505 27. Elise Whitley JB. Statistics review 4: Sample size calculations. Critical Care 2002;6(4):335-41.  
42  
43 506 28. R-Core-Team. R: A Language and Environment for Statistical Computing. Vienna, Austria: The  
44  
45 507 R Foundation for Statistical Computing; 2017.  
46  
47  
48 508 29. Michael Ray Oliver P, Kaaren Yeghiazarian, Min Zheng, Mora Jamshidian, Igor Koyfman. nQuery  
49  
50 509 Advisor. 1995-2007.  
51  
52 510 30. Gold MR, Siegel JE, Russel LB. Cost-effectiveness in Health and Medicine. New York: Oxford  
53  
54 511 University Press; 1996.  
55  
56  
57  
58  
59  
60

- 1  
2  
3 512 31. Netherlands) ZNHI. Kostenhandleiding: Methodologie van kostenonderzoek en  
4  
5 513 referentieprijzen voor economische evaluaties in de gezondheidszorg (Cost Guide: Methology of cost  
6  
7 514 analysis and reference prices for economical evaluations in health care) 2015.
- 8  
9  
10 515 32. Liu CL, Fan ST, Lo CM, Tso WK, Wong Y, Poon RT, et al. Clinico-biochemical prediction of biliary  
11  
12 516 cause of acute pancreatitis in the era of endoscopic ultrasonography. *Aliment Pharmacol Ther.*  
13  
14 517 2005;22(5):423-31.
- 15  
16 518 33. Moolla Z, Anderson F, Thomson SR. Use of amylase and alanine transaminase to predict acute  
17  
18 519 gallstone pancreatitis in a population with high HIV prevalence. *World J Surg.* 2013;37(1):156-61.
- 19  
20  
21 520 34. B. J. Ammori BB, P. Lewis, and S. A. Roberts. The Biochemical Detection of Biliary Etiology of  
22  
23 521 Acute Pancreatitis on Admission: A Revisit in the Modern Era of Biliary Imaging. *Pancreas.*  
24  
25 522 2003;26(2):e32–e5.
- 26  
27  
28 523 35. Tenner SD, H.; Steinberg, W. Predicting gallstone pancreatitis with laboratory parameters: a  
29  
30 524 meta-analysis. *Am J Gastroenterol.* 1994;89:1863-6.
- 31  
32 525 36. Schepers NJ, Bakker OJ, Besselink MG, Bollen TL, Dijkgraaf MG, van Eijck CH, et al. Early biliary  
33  
34 526 decompression versus conservative treatment in acute biliary pancreatitis (APEC trial): study protocol  
35  
36 527 for a randomized controlled trial. *Trials.* 2016;17:5.
- 37  
38  
39 528 37. Frossard JL, Sosa-Valencia L, Amouyal G, Marty O, Hadengue A, Amouyal P. Usefulness of  
40  
41 529 Endoscopic Ultrasonography in Patients with “Idiopathic” Acute Pancreatitis. *Am J Med.* 2000;109:196-  
42  
43 530 200.
- 44  
45 531 38. Govil A, Agrawal MK, Agrawal D, Udawat H. Role of endoscopic ultrasonography in patients  
46  
47 532 with first episode of idiopathic acute pancreatitis. *Indian J Gastroenterol.* 2014;33(3):241-8.
- 48  
49  
50 533 39. Mariani A, Arcidiacono PG, Curioni S, Giussani A, Testoni PA. Diagnostic yield of ERCP and  
51  
52 534 secretin-enhanced MRCP and EUS in patients with acute recurrent pancreatitis of unknown aetiology.  
53  
54 535 *Dig Liver Dis.* 2009;41(10):753-8.
- 55  
56  
57 536 40. Morris-Stiff G, Al-Allak A, Frost B, Lewis WG, Puntis MC, Roberts A. Does Endoscopic Ultrasound  
58  
59 537 Have Anything to Offer in the Diagnosis of Idiopathic Acute Pancreatitis? *JOP.* 2009;10(2):143-6.
- 60

- 1  
2  
3 538 41. Norton SA, Alderson D. Endoscopic ultrasonography in the evaluation of idiopathic acute  
4  
5 539 pancreatitis British Journal of Surgery. 2000;97:1650-5.  
6  
7 540 42. Queneau P-E, Zeeh S, Lapeyre V, Thibault P, Heyd B, Carayon P, et al. Feasibility of and Interest  
8  
9 541 in Combined Endoscopic Ultrasonography and Biliary Drainage in Unexplained Acute Biliopancreatic  
10  
11 542 Disorders. Dig Dis Sci. 2002;47(9):2020-4.  
12  
13  
14 543 43. Rana SS, Bhasin DK, Rao C, Singh K. Role of endoscopic ultrasound in idiopathic acute  
15  
16 544 pancreatitis with negative ultrasound, computed tomography, and magnetic resonance  
17  
18 545 cholangiopancreatography. Ann Gastroenterol. 2012;25(2):133-7.  
19  
20  
21 546 44. Alejandro Repiso Ortega M, Rafael Gómez-Rodríguez, MD, Marta Romero, MD, Soledad  
22  
23 547 Fernández-Zapardiel, MD, María del Mar Céspedes, MD, and José-María Carrobles, MD. Prospective  
24  
25 548 Comparison of Endoscopic Ultrasonography and Magnetic Resonance Cholangiopancreatography in  
26  
27 549 the Etiological Diagnosis of “Idiopathic” Acute Pancreatitis Pancreas. 2011;40(2):289-94.  
28  
29  
30 550 45. Tandon M, Topazian M. Endoscopic Ultrasound in Idiopathic Acute Pancreatitis. Am J  
31  
32 551 Gastroenterol. 2001;96(3):705–9.  
33  
34 552 46. Thevenot A, Bournet B, Otal P, Canevet G, Moreau J, Buscail L. Endoscopic ultrasound and  
35  
36 553 magnetic resonance cholangiopancreatography in patients with idiopathic acute pancreatitis. Dig Dis  
37  
38 554 Sci. 2013;58(8):2361-8.  
39  
40  
41 555 47. Lara LF, Levy MJ. Idiopathic Recurrent Acute Pancreatitis. MedGenMed. 2004;6(4):10.  
42  
43 556 48. Signoretti M, Baccini F, Piciucchi M, Iannicelli E, Valente R, Zerboni G, et al. Repeated  
44  
45 557 Transabdominal Ultrasonography Is a Simple and Accurate Strategy to Diagnose a Biliary Etiology of  
46  
47 558 Acute Pancreatitis. Pancreas. 2014;43(7):1106-10.  
48  
49  
50 559 49. Meeralam Y, Al-Shammari K, Yaghoobi M. Diagnostic accuracy of EUS compared with MRCP in  
51  
52 560 detecting choledocholithiasis: a meta-analysis of diagnostic test accuracy in head-to-head studies.  
53  
54 561 Gastrointest Endosc. 2017;86(6):986-93.  
55  
56  
57 562 50. Stolle M, Sack PM, Thomasius R. Binge drinking in childhood and adolescence: epidemiology,  
58  
59 563 consequences, and interventions. Dtsch Arztebl Int. 2009;106(19):323-8.  
60

- 1  
2  
3 564 51. Sadr Azodi O, Orsini N, Andren-Sandberg A, Wolk A. Effect of type of alcoholic beverage in  
4  
5 565 causing acute pancreatitis. *Br J Surg*. 2011;98(11):1609-16.  
6  
7 566 52. Midanik LT. Drunkenness, feeling the effects and 5+ measures. *Addiction*. 1999;94(6):887- 97.  
8  
9 567 53. Nicolien J. Schepers OJB, Marc G. H. Besselink, Thomas L. Bollen, Marcel G. W. Dijkgraaf, Casper  
10  
11 568 H. J. van Eijck, Paul Fockens, Erwin J. M. van Geenen, Janneke van Grinsven, Nora D. L. Hallensleben,  
12  
13 569 Bettina E. Hansen, Hjalmar C. van Santvoort, Robin Timmer, Marie-Paule G. F. Anten, Clemens J. M.  
14  
15 570 Bolwerk, Foke van Delft, Hendrik M. van Dullemen, G. Willemien Erkelens, Jeanin E. van Hooft, Robert  
16  
17 571 Laheij, René W. M. van der Hulst, Jeroen M. Jansen, Frank J. G. M. Kubben, Sjoerd D. Kuiken, Lars E.  
18  
19 572 Perk, Rogier J. J. de Ridder, Marno C. M. Rijk, Tessa E. H. Römkens, Erik J. Schoon, Matthijs P. Schwartz,  
20  
21 573 B. W. Marcel Spanier, Adriaan C. I. T. L. Tan, Willem J. Thijs, Niels G. Venneman, Frank P. Vleggaar, Wim  
22  
23 574 van de Vrie, Ben J. Witteman, Hein G. Gooszen, Marco J. Bruno and for the Dutch Pancreatitis Study  
24  
25 575 Group. Early biliary decompression versus conservative treatment in acute biliary pancreatitis (APEC  
26  
27 576 trial): study protocol for a randomized controlled trial. *Trials*. 2016;17(5).  
28  
29 577 54. Ratjen F, Döring G. Cystic fibrosis. *The Lancet*. 2003;361(9358):681-9.  
30  
31 578 55. Spanier B, Bruno MJ, Dijkgraaf MG. Incidence and mortality of acute and chronic pancreatitis  
32  
33 579 in the Netherlands: a nationwide record-linked cohort study for the years 1995-2005. *World J*  
34  
35 580 *Gastroenterol*. 2013;19(20):3018-26.  
36  
37 581 56. StatLine C. Households; size, position in household, January 1st 1995-2013 StatLine: Central  
38  
39 582 Bureau for Statistics 2015 [Available from:  
40  
41 583 [http://statline.cbs.nl/Statweb/publication/?VW=T&DM=SLNL&PA=37312&D1=a&D2=0,5,10,\(I-2\)-](http://statline.cbs.nl/Statweb/publication/?VW=T&DM=SLNL&PA=37312&D1=a&D2=0,5,10,(I-2)-&HD=180221-1109&HDR=G1&STB=T)  
42  
43 584 [I&HD=180221-1109&HDR=G1&STB=T](http://statline.cbs.nl/Statweb/publication/?VW=T&DM=SLNL&PA=37312&D1=a&D2=0,5,10,(I-2)-&HD=180221-1109&HDR=G1&STB=T).  
44  
45 585 57. Whitcomb DC. Genetic aspects of pancreatitis. *Annu Rev Med*. 2010;61:413-24.  
46  
47 586 58. Whitcomb DC. Hereditary diseases of the pancreas. In: Yamada T AD, Kaplowitz N, Laine L,  
48  
49 587 Owyang C, Powell DW, editors, editor. *Textbook of Gastroenterology*. 4th ed. Philadelphia: Lippincott  
50  
51 588 Williams & Wilkins; 2003. p. 2147–65.  
52  
53  
54  
55  
56  
57  
58  
59  
60

- 1  
2  
3 589 59. Shane E, Dinaz I. Hypercalcemia: Pathogenesis, clinical manifestations, differential diagnosis  
4  
5 590 and management. In: Favus M, editor. Primer on the metabolic bone diseases and disorders of mineral  
6  
7 591 metabolism. 6th ed. Philadelphia: Kippincott, Williams, and Wilkins; 2006. p. 26-176.
- 8  
9  
10 592 60. Berglund L, Brunzell JD, Goldberg AC, Goldberg IJ, Sacks F, Murad MH, et al. Evaluation and  
11  
12 593 treatment of hypertriglyceridemia: an Endocrine Society clinical practice guideline. J Clin Endocrinol  
13  
14 594 Metab. 2012;97(9):2969-89.
- 15  
16 595 61. Nitsche C, Maertin S, Scheiber J, Ritter CA, Lerch MM, Mayerle J. Drug-induced pancreatitis.  
17  
18 596 Curr Gastroenterol Rep. 2012;14(2):131-8.
- 19  
20  
21 597 62. Lankisch PG, Apte M, Banks PA. Acute pancreatitis. The Lancet. 2015;386(9988):85-96.
- 22  
23 598 63. Tummala P, Tariq SH, Chibnall JT, Agarwal B. Clinical Predictors of Pancreatic Carcinoma  
24  
25 599 Causing Acute Pancreatitis. Pancreas. 2013;42(1):108-13.
- 26  
27  
28 600 64. P. B. Cotton M, G. Lehman, MD, J. Vennes, MD, J. E. Geenen, MD, R. C. G. Russell, MD, W. C.  
29  
30 601 Meyers, MD, C. Liguory, MD, N. Nicki, MD. Endoscopic sphincterotomy complications and their  
31  
32 602 management: an attempt at consensus. Gastrointest Endosc. 1991;37(3):383-93.
- 33  
34 603 65. Connor S. Defining post-operative pancreatitis as a new pancreatic specific complication  
35  
36 604 following pancreatic resection. HPB (Oxford). 2016;18(8):642-51.
- 37  
38  
39 605 66. Booth FV FL. Pancreatoduodenal trauma. In: ed BJ, editor. Blunt multiple trauma. New York:  
40  
41 606 Marcel Dekker; 1990. p. 497-509.
- 42  
43 607 67. Ioana Smith M, Klaus Monkemuller, MD, PhD, and C. Mel Wilcox, MD, MSPH. Incidentally  
44  
45 608 Identified Common Bile Duct Dilatation. A Systematic Review of Evaluation, Causes, and Outcome. J  
46  
47 609 Clin Gastroenterol. 2015;49:810-5.
- 48  
49  
50 610 68. Mortelé KJ, Rocha TC, Streeter JL, Taylor AJ. Multimodality Imaging of Pancreatic and Biliary  
51  
52 611 Congenital Anomalies. Radiographics. 2006;26(3):715-31.
- 53  
54  
55 612  
56  
57  
58 613  
59  
60

1  
2  
3 614 Author Statement  
4

5  
6 615 Authors' contributions  
7

8 616 DSU drafted the manuscript. HCT, RCV, SAB, MGB and JEvH co-authored the writing of the manuscript.  
9

10 617 DSU, RCV, SAB, MABo, MJB, PF, EJMvG, JWP, HCvS, FPV, MGB and JEvH were involved in the design of  
11

12 618 the study during several meetings of the Dutch Pancreatitis Study Group. NDHL, MPGFA, AB, RAB,  
13

14 619 MABr, LH, WLC, HMvD, BCvE, GWE, WLH, CVH, AI, LMK, SDK, LEP, RQ, TEHR, ACITLT, AYT, NGV, AMCJV,  
15

16 620 RLJvW and BJW critically assessed the study design, during several meetings, and edited the  
17

18 621 manuscript. All authors read and approved the final manuscript.  
19  
20  
21

22 622  
23  
24

25 623 Funding statement  
26

27 624 This work was supported by the Dutch Digestive Disease Foundation (*Maag Lever Darm Stichting*, grant  
28

29 625 number D17-25). The PICUS study is an investigator-initiated study. The sponsor had no influence on  
30

31 626 design, implementation and conduct of the study, as well as on collection, analysis and interpretation  
32

33 627 of data, construction of the manuscript and decision to publish.  
34  
35  
36

37 628  
38  
39

40 629 Competing interests statement  
41

42 630 The authors declare that they have no competing interests.  
43  
44

45 631  
46  
47

48 632 Data Availability Statement  
49

50 633 The datasets used and/or analyzed during the current study are available from the corresponding  
51

52 634 author on reasonable request.  
53  
54  
55

56 635  
57  
58

59 636  
60

## 637 Figure legend

638 Overview of screening and study procedures. MRI = magnetic resonance imaging. MRCP = magnetic  
 639 resonance cholangiopancreatography. CRF = Case Report Form. EUS = endoscopic ultrasonography.

640

641

## 642 Table 1

| Standard diagnostic work-up                                          |                                                                            |
|----------------------------------------------------------------------|----------------------------------------------------------------------------|
| <i>Detailed personal and family history, including questions on:</i> | Alcohol use                                                                |
|                                                                      | Recent ERCP                                                                |
|                                                                      | Recent start or changes in use of drugs associated with acute pancreatitis |
|                                                                      | Recent major abdominal trauma                                              |
|                                                                      | Recent abdominal surgery                                                   |
|                                                                      | Familial and hereditary pancreatitis                                       |
|                                                                      | Cystic fibrosis-related pancreatitis                                       |
| <i>Laboratory tests, including:</i>                                  | Blood serum triglycerides level                                            |
|                                                                      | Blood serum calcium level, corrected for the blood serum albumin level     |
|                                                                      | Blood serum ALT level on admission                                         |
| <i>Imaging:</i>                                                      | Transabdominal ultrasound, MRI or MRCP after clinical recovery             |

643 **Table 1: Standard diagnostic work-up** Standard diagnostic work-up according to the 2013 IAP/APA evidence-based guideline  
 644 on management of acute pancreatitis. A listing of the drugs considered to be associated with acute pancreatitis are listed in  
 645 additional file 1. ERCP = endoscopic retrograde cholangiopancreatography; ALT = alanine aminotransferase; MRI = magnetic  
 646 resonance imaging; MRCP = magnetic resonance cholangiopancreatography.

647

648



649 Table 2

| Etiology             | Definition                                                                                                                                                                                                                                                                                                                                                                             |
|----------------------|----------------------------------------------------------------------------------------------------------------------------------------------------------------------------------------------------------------------------------------------------------------------------------------------------------------------------------------------------------------------------------------|
| Alcohol              | > 4 units of alcohol in the 24 hours prior to start of abdominal complaints (50-52)                                                                                                                                                                                                                                                                                                    |
| Biliary disease      | <ol style="list-style-type: none"> <li>1. A transient elevated ALT level of &gt;2 times the upper limit of normal at diagnosis of acute pancreatitis (34), OR</li> <li>2. Gallstones, microlithiasis and/or biliary sludge, OR</li> <li>3. A dilated CBD of &gt;8 mm in patients &lt;76 years or &gt;10 mm in patients &gt;75 years at diagnosis of acute pancreatitis (53)</li> </ol> |
| Cystic fibrosis      | history of cystic fibrosis in the absence of another origin (54)                                                                                                                                                                                                                                                                                                                       |
| Familial             | two or more direct blood-related family members (parents, children or siblings) who have had an episode of acute pancreatitis (55-57)                                                                                                                                                                                                                                                  |
| Hereditary           | mutation in the PRSS1, SPINK1, CFTR, CTSC, CLDN2 or CPA1 gene, or direct family member (parents, children, siblings) with one or more of the above mentioned mutations and at least one direct family member who has (had) acute or chronic pancreatitis (57, 58)                                                                                                                      |
| Hypercalcemia        | blood serum calcium level $\geq 12$ mg/dl (3 mmol/l), corrected for serum albumin level, as first measured during admission (59)                                                                                                                                                                                                                                                       |
| Hypertriglyceridemia | blood serum triglyceride level of $\geq 1000$ mg/dl (11.2 mmol/l) under fasting conditions, as first measured during admission (60)                                                                                                                                                                                                                                                    |
| Medication           | use of drug(s) listed in additional file 1, which has or have been started or increased in dosage within a reasonable temporal sequence, in principle 1                                                                                                                                                                                                                                |

|          |                                                                                                                                              |
|----------|----------------------------------------------------------------------------------------------------------------------------------------------|
|          | month before onset of pancreatitis, and has or have a positive dechallenge (a drug reaction that is confirmed by stopping the drug) (61, 62) |
| Neoplasm | Known hepatopancreatobiliary malignancy or known malignancy with metastases causing obstruction of the pancreatic duct (63)                  |
| ERCP     | ERCP within 24 hours before diagnosis of pancreatitis (64)                                                                                   |
| Surgical | abdominal surgery within 24 hours prior to diagnosis of pancreatitis (65)                                                                    |
| Trauma   | typical blunt trauma to the upper abdomen and pancreatic trauma visible on imaging (66)                                                      |

650 **Table 2: potential etiologies and their definitions** Potential etiologies and their definitions. Side branch or mixed type  
 651 *intraductal papillary mucinous neoplasms without dilatation of the pancreatic duct and pancreas divisum will not be*  
 652 *considered to be a causative factor for the pancreatitis episode. If imaging is not able to discriminate between gall bladder*  
 653 *polyps or concrements, lesions smaller than 10 mm will not be considered an exclusion criterion. Lesions above 10 mm,*  
 654 *irrespective of whether they are a polyp or a concrement, are an immediate indication for cholecystectomy, and these patients*  
 655 *will be excluded from PICUS. ALT = alanine transaminase. CBD = common bile duct. ERCP = endoscopic retrograde*  
 656 *cholangiopancreatography.*

657

658

659 **Table 3**

|                             |                                                                                                                                                                                                                        |
|-----------------------------|------------------------------------------------------------------------------------------------------------------------------------------------------------------------------------------------------------------------|
| <i>Biliary pancreatitis</i> | Presence of biliary stones, microlithiasis, or sludge                                                                                                                                                                  |
|                             | Widened CBD, >8 mm in patients <76 years, or >10 mm in patients >75 years, in the absence of other CBD dilating factors (e.g. opioid use, distal stenosis, obstruction of external compression of CBD or papilla (67)) |
| <i>Chronic pancreatitis</i> | Pancreatic calcifications                                                                                                                                                                                              |
|                             | > 4 of the following abnormal features of the pancreas:                                                                                                                                                                |

|                  |                                                                                                                                                                                                                                                                                                                                                                                                                                                                                                                           |
|------------------|---------------------------------------------------------------------------------------------------------------------------------------------------------------------------------------------------------------------------------------------------------------------------------------------------------------------------------------------------------------------------------------------------------------------------------------------------------------------------------------------------------------------------|
|                  | <ol style="list-style-type: none"> <li>1. Enlarged gland size</li> <li>2. Cysts</li> <li>3. Echo-poor lesions (focal areas of reduced echogenicity)</li> <li>4. Echo-rich lesions (&gt; 3 mm in diameter)</li> <li>5. Accentuation of lobular pattern</li> <li>6. Increased duct wall echogenicity</li> <li>7. Irregularity of the main pancreatic duct</li> <li>8. Dilation of the main pancreatic duct &gt; 3.5 mm (68)</li> <li>9. Visible side branches</li> <li>10. Calcifications of the pancreatic duct</li> </ol> |
| <i>Neoplasms</i> | Definitive diagnosis of pathological tissue after histological or cytological evaluation of specimen of an anomaly observed during EUS, e.g. hyperplastic or malignant tissue, or auto-immune inflammatory disease                                                                                                                                                                                                                                                                                                        |
|                  | Main duct IPMN or mixed type IPMN causing dilatation of the pancreatic duct                                                                                                                                                                                                                                                                                                                                                                                                                                               |

660 **Table 3: positive imaging** Definition of positive imaging. For each diagnosis, presence of one of the separately mentioned  
661 abnormalities is required to be considered as positive imaging. Specimen is not required to be obtained during EUS. Anatomical  
662 anomalies (e.g. divisum) are not considered a certain etiology in first episode IAP and therefore not considered as positive  
663 imaging. CBD = common bile duct. EUS = endoscopic ultrasonography. IPMN = intraductal papillary mucinous neoplasm.

664

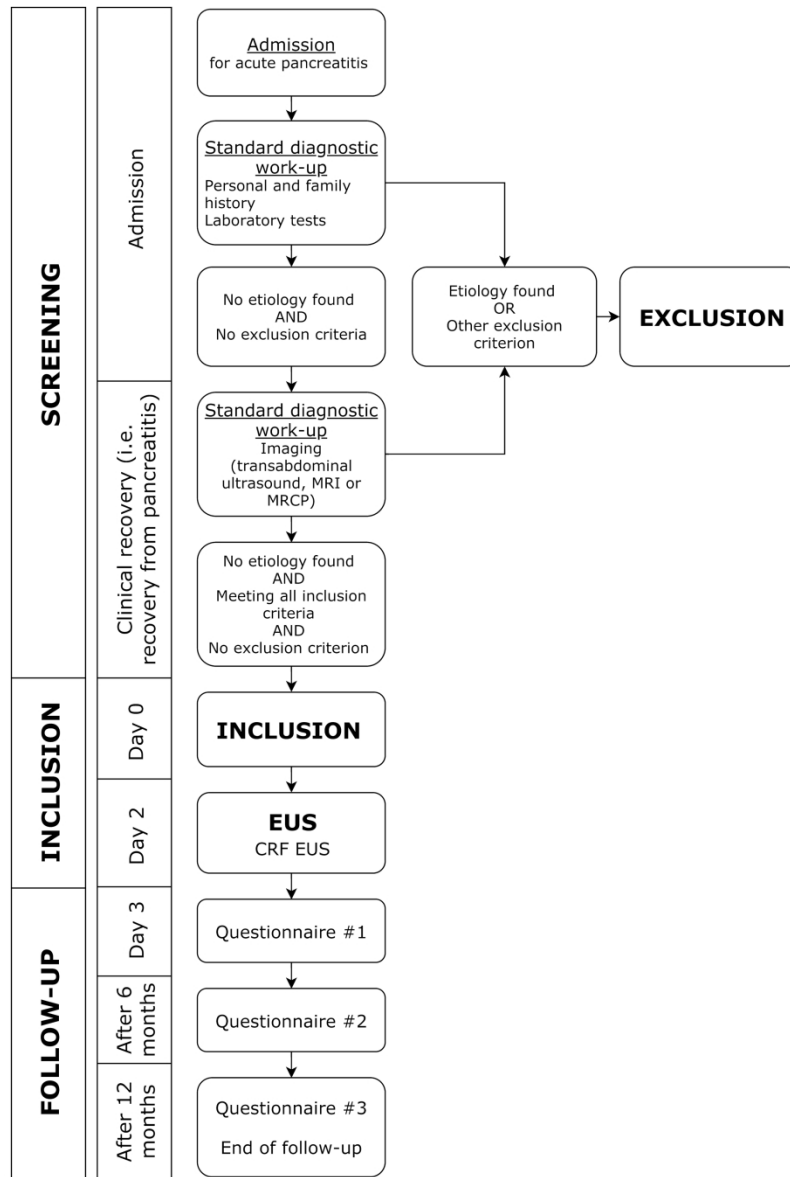

Overview of screening and study procedures. MRI = magnetic resonance imaging. MRCP = magnetic resonance cholangiopancreatography. CRF = Case Report Form. EUS = endoscopic ultrasonography.

105x154mm (600 x 600 DPI)

## Additional file 1: Table S1 Drugs associated with acute pancreatitis

| Drugs associated with acute pancreatitis |              |                     |                 |                                |
|------------------------------------------|--------------|---------------------|-----------------|--------------------------------|
| Acetaminophen                            | Cisplatin    | Hydrochlorothiazide | Methyldopa      | Pentavalent antimony compounds |
| Asparaginase                             | Cytarabine   | Interferon alpha    | Metronidazole   |                                |
| Azathioprine                             | Didanosine   | Itraconazole        | Octreotide      | Phenformin                     |
| Bortezomib                               | Enalapril    | Lamivudine          | Olanzapine      | Simvastatin                    |
| Capecitabine                             | Erythromycin | Mercaptopurine      | Opiates         | Steroids                       |
| Carbamazepine                            | Estrogens    | Mesalazine          | Oxyphenbutazone | Sulfasalazine                  |
| Cimetidine                               | Furosemide   | Olsalazine          | Pentamidine     | co-trimoxazole                 |

*Drugs with a definite association with acute pancreatitis (1, 2)*

### References

1. Nitsche C, Maertin S, Scheiber J, Ritter CA, Lerch MM, Mayerle J. Drug-induced pancreatitis. *Curr Gastroenterol Rep.* 2012;14(2):131-8.
2. Lankisch PG, Apte M, Banks PA. Acute pancreatitis. *The Lancet.* 2015;386(9988):85-96.

## 1 Additional file 2: Relevant definitions

2 Acute pancreatitis: an acute inflammation of the pancreatic parenchyma, diagnosed when at least two  
3 of the three following characteristics are present (1):

- 4 1. Clinical features of acute pancreatitis, such as upper abdominal pain
- 5 2. Elevated serum amylase or lipase levels of at least three times the upper limit of normal (ULN)
- 6 3. Signs of acute pancreatitis on imaging

7 Note: no value of the required serum amylase or lipase level is provided as every participating center  
8 has a local laboratory, which is why each center may use different normal range values.

9  
10 Idiopathic acute pancreatitis is considered to be present if no etiology is found in standard work-up,  
11 which comprises at least the following tests:

- 12 1. A detailed personal and family history, including questions on:
  - 13 a. Alcohol use
  - 14 b. Recent endoscopic retrograde cholangiopancreatography (ERCP)
  - 15 c. Recent start of or changes in use of drugs associated with acute pancreatitis
  - 16 d. Recent major abdominal trauma
  - 17 e. Recent abdominal surgery
  - 18 f. Familial pancreatitis
  - 19 g. Hereditary pancreatitis
  - 20 h. Cystic fibrosis related pancreatitis

1  
2  
3 21 2. Laboratory tests, including:  
4  
5

6 22 a. Blood serum triglycerides level on admission  
7

8  
9 23 b. Blood serum calcium level, corrected for the serum albumin level, on admission  
10

11  
12 24 c. Blood serum alanine transaminase (ALT) level on admission  
13

14  
15 25 3. Imaging via transabdominal ultrasound, magnetic resonance imaging (MRI) or magnetic  
16  
17 26 resonance cholangiopancreatography (MRCP) after clinical recovery  
18

19  
20 27 Note: side branch or mixed type intraductal papillary mucinous neoplasms (IPMN) without dilatation  
21  
22 28 of the pancreatic duct will not be considered to be a causative factor for the pancreatitis episode.  
23

24  
25 29 Note: if the imaging is not able to discriminate between gall bladder polyps or concrements, lesions  
26  
27 30 smaller than 10 mm will not be considered an exclusion criterion. Lesions above 10 mm, irrespective  
28  
29 31 of whether they are a polyp or a concrement, are an immediate indication for cholecystectomy, and  
30  
31 32 will be excluded from PICUS.  
32  
33

34  
35 34 Alcoholic pancreatitis: pancreatitis caused by an excess intake of alcohol, diagnosed when biliary  
36  
37 35 etiology is not demonstrated by standard work-up and the patient has indicated (either by direct or  
38  
39 36 indirect personal history or by findings during physical examination) to have drunk at least five units of  
40  
41 37 alcohol in the 24 hours prior to start of abdominal complaints (or in asymptomatic acute pancreatitis:  
42  
43 38 prior to diagnosis) (2-4)  
44  
45  
46  
47  
48

49  
50 39  
51  
52 40 Biliary pancreatitis: pancreatitis caused by biliary stones, microlithiasis or sludge, diagnosed when one  
53  
54 41 of the following features is present:  
55

56  
57 42 1. A transient elevated ALT level of more than two times the ULN at diagnosis of acute  
58  
59 43 pancreatitis (5)  
60

- 1  
2  
3 44 2. Signs of presence of gallstones, microlithiasis or sludge on imaging, defined as follows:  
4  
5  
6 45 a. Gallstones, microlithiasis and/or biliary sludge, either in the gall bladder, ductus  
7  
8 46 cysticus, intrahepatic bile ducts or in the common bile duct (CBD), and/or  
9  
10  
11 47 b. A CBD of more than eight mm in patients 75 years old or younger or more than ten  
12  
13 48 mm in patients older than 75 years at diagnosis of acute pancreatitis (6)  
14  
15

16 49 Note: no value of the required serum ALT level is provided as the normal range values depend on the  
17  
18 50 sex of the patient and as every participating center has a local laboratory, which is why each center  
19  
20 51 may use different normal range values.  
21  
22

23 52  
24  
25  
26 53 Chronic pancreatitis: a chronic inflammation of the pancreatic parenchyma, defined as typical clinical  
27  
28 54 history of chronic pancreatitis (such as recurrent pancreatitis or abdominal pain, except for primary  
29  
30 55 painless pancreatitis) and one or more of the following (7):  
31  
32

- 33  
34 56 1. Pancreatic calcifications  
35  
36  
37 57 2. Moderate or marked ductal lesions, defined as two or more of the following abnormal features  
38  
39 58 on transabdominal ultrasound, computed tomography (CT) or MRI/MRCP, according to the  
40  
41 59 Cambridge classification (8):  
42  
43  
44 60 a. Main pancreatic duct abnormalities, either enlargement or increased echogenicity of  
45  
46 61 the duct wall (mandatory)  
47  
48  
49 62 b. Pancreatic enlargement  
50  
51  
52 63 c. Cavities  
53  
54  
55 64 d. Duct irregularities including intraductal fillings defects, calculi or duct obstruction  
56  
57  
58 65 e. Focal acute pancreatitis  
59  
60



- 1
- 2
- 3 66 f. Parenchymal heterogeneity
- 4
- 5
- 6 67 g. Irregularities of pancreatic head or body contour
- 7
- 8
- 9 68 3. Moderate or marked ductal lesions, defined as five or more of the following abnormal features
- 10
- 11 69 on endoscopic ultrasonography (EUS):
- 12
- 13
- 14 70 a. Enlarged gland size
- 15
- 16
- 17 71 b. Cysts
- 18
- 19
- 20 72 c. Echo-poor lesions (focal areas of reduced echogenicity)
- 21
- 22
- 23 73 d. Echo-rich lesions (more than three mm in diameter)
- 24
- 25
- 26 74 e. Accentuation of lobular pattern (e.g., echo-poor normal parenchyma surrounded by
- 27
- 28 75 hyperechoic strands)
- 29
- 30
- 31 76 f. Increased duct wall echogenicity
- 32
- 33
- 34 77 g. Irregularity of the main pancreatic duct (e.g., with narrowing of the duct)
- 35
- 36
- 37 78 h. Dilation of the main pancreatic duct
- 38
- 39
- 40 79 i. Visible side branches (e.g., with dilation)
- 41
- 42
- 43 80 j. Calcification (of the pancreatic duct)
- 44
- 45 81 4. Marked and persistent exocrine insufficiency defined as pancreatic steatorrhea markedly
- 46
- 47 82 reduced by enzyme supplementation
- 48
- 49
- 50 83 5. Typical histology of an adequate histological specimen
- 51
- 52

53 84 Note: during initial diagnostic work-up during admission 'marked and persistent exocrine insufficiency'

54

55 85 cannot be evaluated properly. Therefore this part of the definition of chronic pancreatitis will not be

56

57

58 86 applicable during standard work-up. However, if the patient does show marked and persistent

59

60 87 exocrine insufficiency during follow-up (either during the outpatient clinic visit after repeat

1  
2  
3 88 transabdominal ultrasound or after the EUS), this will be considered to be diagnostic for chronic  
4  
5 89 pancreatitis. The same is applicable for histology of an adequate histological specimen: this is not part  
6  
7 90 of standard work-up, however, if a typical histological specimen is obtained during follow-up, this will  
8  
9 91 be considered to be diagnostic for chronic pancreatitis.  
10  
11  
12

13 92  
14  
15 93 Cystic fibrosis: an autosomal recessive disorder caused by a mutation in the CFTR gene, resulting in  
16  
17 94 defective chloride channels in epithelial cells, diagnosed by either a concentration in sweat of chloride  
18  
19 95 greater than 60 mmol/L on repeated analysis, confirmation of a CFTR gene mutation, or both (9).  
20  
21  
22

23 96  
24  
25 97 Cystic fibrosis related pancreatitis: pancreatitis caused by defective ductular and acinar pancreatic  
26  
27 98 secretion, diagnosed when a patient with a history of cystic fibrosis presents with an acute pancreatitis  
28  
29 99 in the absence of another origin (9).  
30  
31  
32

33 100  
34  
35 101 Familial pancreatitis: acute pancreatitis from any cause that occurs in a family with an incidence that  
36  
37 102 is greater than would be expected by chance alone, given the size of the family and the standardized  
38  
39 103 incidence of pancreatitis within the Dutch population, defined as acute pancreatitis in patients who  
40  
41 104 have two or more direct blood-related family members (parents, children or siblings) who have had an  
42  
43 105 episode of acute pancreatitis (10-12).  
44  
45  
46  
47

48 106  
49  
50 107 Fever: a body temperature of 38.5°C or higher.  
51  
52  
53

54 108  
55  
56 109 Hereditary pancreatitis: otherwise unexplained pancreatitis in an individual from a family in which the  
57  
58 110 pancreatitis phenotype appears to be inherited through a disease-causing gene mutation expressed in  
59  
60

1  
2  
3 111 an autosomal dominant pattern, defined as pancreatitis in patients with a known mutation in the  
4  
5 112 PRSS1 gene, the SPINK1 gene, the CFTR gene, the CTRC gene, the CLDN2 gene or the CPA1 gene, or if  
6  
7 113 the patient has a direct family member (parents, children, siblings) with one or more of the above  
8  
9  
10 114 mentioned mutations and has at least one direct family member who has had an episode of acute  
11  
12 115 pancreatitis or has chronic pancreatitis (12, 13).

13  
14  
15 116  
16  
17  
18 117 Hypercalcemic pancreatitis: acute pancreatitis caused by hypercalcemia and diagnosed when no signs  
19  
20 118 of a biliary pancreatitis are found in standard work-up and the patient has a blood serum calcium level  
21  
22 119 of at least 12 mg/dl or 3 mmol/l, corrected for the serum albumin level, as first measured during  
23  
24 120 admission (14).

25  
26  
27 121  
28  
29  
30 122 Hypertriglyceridemic pancreatitis: acute pancreatitis based on hypertriglyceridemia and diagnosed if  
31  
32 123 a biliary etiology is not demonstrated by standard work-up and the patient has a blood serum  
33  
34 124 triglyceride level of at least 1000 mg/dl (or 11.2 mmol/l) under fasting conditions, as first measured  
35  
36 125 during admission (15).

37  
38  
39  
40 126  
41  
42  
43 127 Hypothermia: a body temperature of 35.9°C or lower.

44  
45  
46 128  
47  
48  
49 129 Infected (extra)pancreatic necrosis: presence of microorganisms in (extra-)pancreatic necrosis,  
50  
51 130 confirmed by a positive culture obtained by means of fine needle aspiration or from the first drainage  
52  
53 131 procedure or necrosectomy, the presence of gas in the (extra-)pancreatic collection on CT, or the  
54  
55 132 presence of clinical signs of persistent sepsis or progressive clinical deterioration despite maximal  
56  
57 133 support on the intensive care unit (ICU) without other causes for infection (ruled out should be:

1  
2  
3 134 pneumonia, urinary tract infection, wound infection, endocarditis, abdominal sepsis or any other  
4  
5 135 infection which could be suspected based on the individual patient's clinical presentation) (16).  
6  
7

8 136

9  
10 137 Medication associated pancreatitis: acute pancreatitis is considered to be caused by drugs when a  
11  
12 138 biliary cause is not demonstrated by standard work-up, the patient uses one or multiple drug(s) listed  
13  
14 139 in table S1 in additional file 1, the drug has been started or increased in dosage within a reasonable  
15  
16 140 temporal sequence, in principle 1 month before the onset of the pancreatitis, and has a positive  
17  
18 141 dechallenge (a drug reaction that is confirmed by stopping the drug) (17, 18).  
19  
20  
21  
22 142

23  
24 143 Microlithiasis: stones or concrements, smaller than four mm, in the gall bladder or the bile ducts (19).  
25  
26  
27 144

28  
29  
30 145 Murphy's sign: the phenomenon where compression of the right upper quadrant causes the patient  
31  
32 146 to catch their breath due to pain when taking a deep breath (20).  
33  
34  
35 147

36  
37  
38 148 Pancreas divisum: a congenital malformation of the main pancreatic duct (Wirsung's duct) with two  
39  
40 149 separate ducts (a separate ventral duct of Wirsung and a dorsal duct of Santorini) as opposed to one  
41  
42 150 main duct (of Wirsung) (21).  
43  
44  
45 151

46  
47  
48 152 Positive imaging: positive imaging is defined as imaging during which a definitive cause for the acute  
49  
50 153 pancreatitis episode can be found; or during which abnormalities are visualized constituting a  
51  
52 154 definitive cause, after obtaining tissue and pathological examination. So, if during EUS ductal  
53  
54 155 abnormalities are found, yet not enough to make a certain diagnosis of chronic pancreatitis according  
55  
56 156 to the M-ANNHEIM classification (7), this imaging is considered to be negative, even though it did show  
57  
58 157 abnormalities. This approach is chosen because the aim of this study is to determine the rate of which  
59  
60

1  
2  
3 158 EUS can find a causative factor for a previous acute pancreatitis episode. For the same reason, finding  
4  
5 159 of an anatomical abnormality after a first episode of acute pancreatitis is not scored as positive  
6  
7 160 imaging. An overview of the exact findings scored as positive imaging is provided in table 3 of the main  
8  
9  
10 161 manuscript.

11  
12  
13 162  
14  
15  
16 163 Post-ERCP pancreatitis: pancreatitis caused by mechanical injury from instrumentation and hydrostatic  
17  
18 164 injury from contrast injection during ERCP, diagnosed if a patient develops a pancreatitis within 24  
19  
20 165 hours of an ERCP without indications of another origin (22).

21  
22  
23 166  
24  
25  
26 167 Postoperative pancreatitis: pancreatitis caused by perioperative hypoperfusion of the pancreas,  
27  
28 168 diagnosed if a patient develops a pancreatitis within 24 hours of abdominal surgery in the absence of  
29  
30 169 indications for another origin (23).

31  
32  
33 170  
34  
35  
36 171 Posttraumatic pancreatitis: pancreatitis caused by pancreatic injury due to trauma to the abdomen,  
37  
38 172 diagnosed when the patient describes a typical blunt trauma to the upper abdomen and pancreatic  
39  
40 173 trauma is visible on imaging (24).

41  
42  
43 174  
44  
45  
46 175 Recurrence rate: the risk of a recurrent episode of acute pancreatitis.

47  
48  
49 176  
50  
51  
52 177 Sludge: solid material which results from the slow settling of particles dispersed in bile (19).

53  
54  
55 178

56  
57  
58 179

59  
60

1  
2  
3 180 Standard work-up:  
4  
5

6 181 1. A detailed personal and family history, including questions on:  
7

8  
9 182 a. Alcohol use  
10

11  
12 183 b. Recent ERCP  
13

14  
15 184 c. Recent start of or changes in use of drugs associated with acute pancreatitis  
16

17  
18 185 d. Recent major abdominal trauma  
19

20  
21 186 e. Recent abdominal surgery  
22

23  
24 187 f. Familial pancreatitis  
25

26  
27 188 g. Hereditary pancreatitis  
28

29  
30 189 h. Cystic fibrosis related pancreatitis  
31

32 190 2. Laboratory tests, including:  
33

34  
35 191 a. Blood serum triglycerides level, first measured during admission  
36

37  
38 192 b. Blood serum calcium level, corrected for the serum albumin level, first measured  
39 during admission  
40 193

41  
42  
43 194 c. Blood serum ALT level on admission  
44  
45

46 195 3. Imaging via transabdominal ultrasound, MRI or MRCP after clinical recovery  
47  
48

49 196  
50  
51

52 197 Biliary events: acute cholecystitis; biliary colic's requiring readmission; biliary pancreatitis; cholangitis;  
53  
54 198 or obstructive choledocholithiasis needing ERCP.  
55  
56

57 199  
58  
59  
60

1  
2  
3 200 Acute cholecystitis: an acute inflammation of the gall bladder, diagnosed when one item in A, B and C

4  
5 201 is present:

6  
7  
8 202 A) Local signs of inflammation

9  
10  
11 203 1. Murphy's' sign, or

12  
13  
14 204 2. Right upper abdominal quadrant mass, pain or tenderness

15  
16  
17 205 B) Systemic signs of inflammation

18  
19  
20 206 1. Fever or hypothermia, or

21  
22  
23 207 2. Elevated C-reactive protein (CRP), or

24  
25  
26 208 3. Elevated white blood cell count

27  
28  
29 209 C) Imaging findings characteristic of acute cholecystitis (25, 26)

30  
31 210 Note: acute cholecystitis and cholangitis are defined according to the Tokyo classification which  
32 211 defines fever as a body temperature of 38°C or higher; however, fever will be defined in this study as  
33 212 hyperthermia of 38.5°C or higher and hypothermia will be added as a systemic sign of inflammation,  
34 213 as this more accurately reflects clinical practice in the Netherlands.

35  
36  
37  
38  
39  
40  
41 214

42  
43  
44 215 Biliary colic: upper abdominal pain (either right upper quadrant or epigastric pain) lasting at least 30  
45 216 minutes, often associated with restlessness (27).

46  
47  
48  
49 217

50  
51 218 Cholangitis: an inflammation of the bile duct(s), diagnosed when one item in each of the following  
52 219 categories is present:

53  
54  
55  
56 220 1. Systemic inflammation

57  
58  
59 221 a. Fever, hypothermia and/or shaking chills

1  
2  
3 222 b. Laboratory data: evidence of inflammatory response (abnormal white blood cell  
4  
5 223 counts (defined as smaller than 4,000/ $\mu$ l or larger than 10,000/ $\mu$ l), increase of serum  
6  
7 224 CRP levels (defined as 1 mg/dl or higher), and other changes indicating inflammation)  
8  
9

10 225 2. Cholestasis  
11  
12

13 226 a. Jaundice (defined as a total bilirubin of 2 mg/dl or higher)  
14  
15

16 227 b. Laboratory data: abnormal liver function tests (increased serum alkaline phosphatase,  
17  
18 228 gamma-glutamyltransferase (gamma-GT), aspartate transaminase (AST) and ALT  
19  
20 229 levels (defined as more than 1.5 times the ULN))  
21  
22

23 230 3. Imaging  
24  
25

26 231 a. Biliary dilatation  
27  
28

29 232 b. Evidence of the etiology on imaging (stricture, stone, stent etc.) (25)  
30  
31

32 233 Note: acute cholecystitis and cholangitis are defined according to the Tokyo classification which  
33  
34 234 defines fever as a body temperature of 38°C or higher; however, fever will be defined in this study as  
35  
36 235 hyperthermia of 38.5°C or higher and hypothermia will be added as a systemic sign of inflammation,  
37  
38 236 as this more accurately reflects clinical practice in the Netherlands.  
39  
40  
41

42 237  
43  
44

45 238 Obstructive choledocholithiasis: presence of gallstones, microlithiasis or biliary sludge in the CBD on  
46  
47 239 imaging, requiring an ERCP, according to the treating physician.  
48  
49

50 240  
51  
52

53 241  
54  
55  
56  
57  
58  
59  
60



## 242 References

- 243 1. Banks PA, Bollen TL, Dervenis C, Gooszen HG, Johnson CD, Sarr MG, et al. Classification of acute  
244 pancreatitis--2012: revision of the Atlanta classification and definitions by international consensus. *Gut*.  
245 2013;62(1):102-11.
- 246 2. Stolle M, Sack PM, Thomasius R. Binge drinking in childhood and adolescence: epidemiology,  
247 consequences, and interventions. *Dtsch Arztebl Int*. 2009;106(19):323-8.
- 248 3. Sadr Azodi O, Orsini N, Andren-Sandberg A, Wolk A. Effect of type of alcoholic beverage in causing  
249 acute pancreatitis. *Br J Surg*. 2011;98(11):1609-16.
- 250 4. Midanik LT. Drunkenness, feeling the effects and 5+ measures. *Addiction*. 1999;94(6):887- 97.
- 251 5. B. J. Ammori BB, P. Lewis, and S. A. Roberts. The Biochemical Detection of Biliary Etiology of Acute  
252 Pancreatitis on Admission: A Revisit in the Modern Era of Biliary Imaging. *Pancreas*. 2003;26(2):e32–e5.
- 253 6. Nicolien J. Schepers OJB, Marc G. H. Besselink, Thomas L. Bollen, Marcel G. W. Dijkgraaf, Casper H. J.  
254 van Eijck, Paul Fockens, Erwin J. M. van Geenen, Janneke van Grinsven, Nora D. L. Hallensleben, Bettina E.  
255 Hansen, Hjalmar C. van Santvoort, Robin Timmer, Marie-Paule G. F. Anten, Clemens J. M. Bolwerk, Foke van  
256 Delft, Hendrik M. van Dullemen, G. Willemien Erkelens, Jeanin E. van Hooft, Robert Laheij, René W. M. van der  
257 Hulst, Jeroen M. Jansen, Frank J. G. M. Kubben, Sjoerd D. Kuiken, Lars E. Perk, Rogier J. J. de Ridder, Marno C.  
258 M. Rijk, Tessa E. H. Römken, Erik J. Schoon, Matthijs P. Schwartz, B. W. Marcel Spanier, Adriaan C. I. T. L. Tan,  
259 Willem J. Thijs, Niels G. Venneman, Frank P. Vleggaar, Wim van de Vrie, Ben J. Witteman, Hein G. Gooszen,  
260 Marco J. Bruno and for the Dutch Pancreatitis Study Group. Early biliary decompression versus conservative  
261 treatment in acute biliary pancreatitis (APEC trial): study protocol for a randomized controlled trial. *Trials*.  
262 2016;17(5).
- 263 7. Schneider A, Lohr JM, Singer MV. The M-ANNHEIM classification of chronic pancreatitis: introduction  
264 of a unifying classification system based on a review of previous classifications of the disease. *J Gastroenterol*.  
265 2007;42(2):101-19.
- 266 8. Sarner M, Cotton PB. Classification of pancreatitis. *Gut*. 1984;25:756-9.
- 267 9. Ratjen F, Döring G. Cystic fibrosis. *The Lancet*. 2003;361(9358):681-9.

- 1  
2  
3 268 10. Spanier B, Bruno MJ, Dijkgraaf MG. Incidence and mortality of acute and chronic pancreatitis in the  
4  
5 269 Netherlands: a nationwide record-linked cohort study for the years 1995-2005. *World J Gastroenterol.*  
6  
7 270 2013;19(20):3018-26.  
8  
9 271 11. StatLine C. Households; size, position in household, January 1st 1995-2013 StatLine: Central Bureau for  
10  
11 272 Statistics 2015 [Available from:  
12  
13 273 [http://statline.cbs.nl/Statweb/publication/?VW=T&DM=SLNL&PA=37312&D1=a&D2=0,5,10,\(I-2\)-](http://statline.cbs.nl/Statweb/publication/?VW=T&DM=SLNL&PA=37312&D1=a&D2=0,5,10,(I-2)-I&HD=180221-1109&HDR=G1&STB=T)  
14  
15 274 [I&HD=180221-1109&HDR=G1&STB=T](http://statline.cbs.nl/Statweb/publication/?VW=T&DM=SLNL&PA=37312&D1=a&D2=0,5,10,(I-2)-I&HD=180221-1109&HDR=G1&STB=T).  
16  
17 275 12. Whitcomb DC. Genetic aspects of pancreatitis. *Annu Rev Med.* 2010;61:413-24.  
18  
19 276 13. Whitcomb DC. Hereditary diseases of the pancreas. In: Yamada T AD, Kaplowitz N, Laine L, Owyang C,  
20  
21 277 Powell DW, editors, editor. *Textbook of Gastroenterology*. 4th ed. Philadelphia: Lippincott Williams & Wilkins;  
22  
23 278 2003. p. 2147–65.  
24  
25 279 14. Shane E, Dinaz I. Hypercalcemia: Pathogenesis, clinical manifestations, differential diagnosis and  
26  
27 280 management. In: Favus M, editor. *Primer on the metabolic bone diseases and disorders of mineral metabolism*.  
28  
29 281 6th ed. Philadelphia: Kippincott, Williams, and Wilkins; 2006. p. 26-176.  
30  
31 282 15. Berglund L, Brunzell JD, Goldberg AC, Goldberg IJ, Sacks F, Murad MH, et al. Evaluation and treatment  
32  
33 283 of hypertriglyceridemia: an Endocrine Society clinical practice guideline. *J Clin Endocrinol Metab.*  
34  
35 284 2012;97(9):2969-89.  
36  
37 285 16. van Brunschot S, van Grinsven J, van Santvoort HC, Bakker OJ, Besselink MG, Boermeester MA, et al.  
38  
39 286 Endoscopic or surgical step-up approach for infected necrotising pancreatitis: a multicentre randomised trial.  
40  
41 287 *The Lancet.* 2018;391(10115):51-8.  
42  
43 288 17. Nitsche C, Maertin S, Scheiber J, Ritter CA, Lerch MM, Mayerle J. Drug-induced pancreatitis. *Curr*  
44  
45 289 *Gastroenterol Rep.* 2012;14(2):131-8.  
46  
47 290 18. Lankisch PG, Apte M, Banks PA. Acute pancreatitis. *The Lancet.* 2015;386(9988):85-96.  
48  
49 291 19. Jungst C, Kullak-Ublick GA, Jungst D. Gallstone disease: Microlithiasis and sludge. *Best Pract Res Clin*  
50  
51 292 *Gastroenterol.* 2006;20(6):1053-62.  
52  
53 293 20. Murphy JB. The diagnosis of gall-stones. *Am Med News.* 1903;82:825.33.  
54  
55 294 21. PB C. Congenital anomaly of pancreas divisum as cause of obstructive pain and pancreatitis. *Gut.*  
56  
57 295 1980;21:105-14.  
58  
59  
60

- 1  
2  
3 296 22. P. B. Cotton M, G. Lehman, MD, J. Vennes, MD, J. E. Geenen, MD, R. C. G. Russell, MD, W. C. Meyers,  
4  
5 297 MD, C. Liguory, MD, N. Nicki, MD. Endoscopic sphincterotomy complications and their management: an  
6  
7 298 attempt at consensus. *Gastrointest Endosc.* 1991;37(3):383-93.
- 9 299 23. Connor S. Defining post-operative pancreatitis as a new pancreatic specific complication following  
10  
11 300 pancreatic resection. *HPB (Oxford)*. 2016;18(8):642-51.
- 13 301 24. Booth FV FL. Pancreatoduodenal trauma. In: ed BJ, editor. *Blunt multiple trauma*. New York: Marcel  
14  
15 302 Dekker; 1990. p. 497-509.
- 17 303 25. Miura F, Okamoto K, Takada T, Strasberg SM, Asbun HJ, Pitt HA, et al. Tokyo Guidelines 2018: initial  
18  
19 304 management of acute biliary infection and flowchart for acute cholangitis. *J Hepatobiliary Pancreat Sci.*  
20  
21 305 2018;25(1):31-40.
- 23 306 26. Masamichi Yokoe TT, Steven M. Strasberg, Joseph S. Solomkin, Toshihiko Mayumi, Harumi Gomi,  
24  
25 307 Henry A. Pitt, O. James Garden, Seiki Kiriyaama, Jiro Hata, Toshifumi Gabata, Masahiro Yoshida, Fumihiko Miura,  
26  
27 308 Kohji Okamoto, Toshio Tsuyuguchi, Takao Itoi, Yuichi Yamashita, Christos Dervenis, Angus C. W. Chan, Wan-Yee  
28  
29 309 Lau, Avinash N. Supe, Giulio Belli, Serafin C. Hilvano, Kui-Hin Liau, Myung-Hwan Kim, Sun-Whe Kim, Chen-Guo  
30  
31 310 Ker. TG13 diagnostic criteria and severity grading of acute cholecystitis (with videos). *J Hepatobiliary Pancreat*  
32  
33 311 *Sci.* 2013;20:35-46.
- 35 312 27. EB French WR. Biliary and renal colic. *Br Med J.* 1963:135-8.
- 37  
38 313

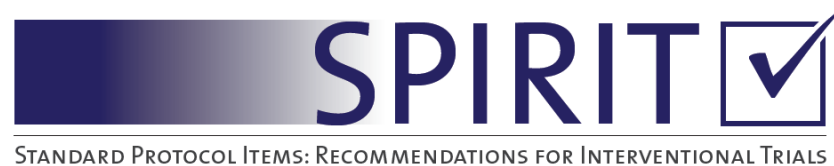

SPIRIT 2013 Checklist: Recommended items to address in a clinical trial protocol and related documents\*

| Section/item                      | ItemNo | Description                                                                                                                                                                                                                                                                              | Addressed on page number |
|-----------------------------------|--------|------------------------------------------------------------------------------------------------------------------------------------------------------------------------------------------------------------------------------------------------------------------------------------------|--------------------------|
| <b>Administrative information</b> |        |                                                                                                                                                                                                                                                                                          |                          |
| Title                             | 1      | Descriptive title identifying the study design, population, interventions, and, if applicable, trial acronym                                                                                                                                                                             | 1                        |
| Trial registration                | 2a     | Trial identifier and registry name. If not yet registered, name of intended registry                                                                                                                                                                                                     | 7                        |
|                                   | 2b     | All items from the World Health Organization Trial Registration Data Set                                                                                                                                                                                                                 | 1, 3, 7, 9-14, 22, 23    |
| Protocol version                  | 3      | Date and version identifier                                                                                                                                                                                                                                                              | 1                        |
| Funding                           | 4      | Sources and types of financial, material, and other support                                                                                                                                                                                                                              | 23                       |
| Roles and responsibilities        | 5a     | Names, affiliations, and roles of protocol contributors                                                                                                                                                                                                                                  | 1-3, 23                  |
|                                   | 5b     | Name and contact information for the trial sponsor                                                                                                                                                                                                                                       | 24                       |
|                                   | 5c     | Role of study sponsor and funders, if any, in study design; collection, management, analysis, and interpretation of data; writing of the report; and the decision to submit the report for publication, including whether they will have ultimate authority over any of these activities | 23                       |

1  
2  
3  
4  
5  
6  
7  
8  
9  
10  
11  
12  
13  
14  
15  
16  
17  
18  
19  
20  
21  
22  
23  
24  
25  
26  
27  
28  
29  
30  
31  
32  
33  
34  
35  
36  
37  
38  
39  
40  
41  
42  
43  
44  
45  
46

5d Composition, roles, and responsibilities of the coordinating centre, steering committee, endpoint adjudication committee, data management team, and other individuals or groups overseeing the trial, if applicable (see Item 21a for data monitoring committee) 24-26

**Introduction**

Background and rationale 6a Description of research question and justification for undertaking the trial, including summary of relevant studies (published and unpublished) examining benefits and harms for each intervention 8, 9

6b Explanation for choice of comparators Not applicable

Objectives 7 Specific objectives or hypotheses 9

Trial design 8 Description of trial design including type of trial (eg, parallel group, crossover, factorial, single group), allocation ratio, and framework (eg, superiority, equivalence, noninferiority, exploratory) 9

**Methods: Participants, interventions, and outcomes**

Study setting 9 Description of study settings (eg, community clinic, academic hospital) and list of countries where data will be collected. Reference to where list of study sites can be obtained 9

Eligibility criteria 10 Inclusion and exclusion criteria for participants. If applicable, eligibility criteria for study centres and individuals who will perform the interventions (eg, surgeons, psychotherapists) 10, 11

Interventions 11a Interventions for each group with sufficient detail to allow replication, including how and when they will be administered 11

11b Criteria for discontinuing or modifying allocated interventions for a given trial participant (eg, drug dose change in response to harms, participant request, or improving/worsening disease) Not applicable

|    |                                                                     |     |                                                                                                                                                                                                                                                                                                                                                                                |                |
|----|---------------------------------------------------------------------|-----|--------------------------------------------------------------------------------------------------------------------------------------------------------------------------------------------------------------------------------------------------------------------------------------------------------------------------------------------------------------------------------|----------------|
| 1  |                                                                     |     |                                                                                                                                                                                                                                                                                                                                                                                |                |
| 2  |                                                                     |     |                                                                                                                                                                                                                                                                                                                                                                                |                |
| 3  |                                                                     |     |                                                                                                                                                                                                                                                                                                                                                                                |                |
| 4  |                                                                     | 11c | Strategies to improve adherence to intervention protocols, and any procedures for monitoring adherence (eg, drug tablet return, laboratory tests)                                                                                                                                                                                                                              | Not applicable |
| 5  |                                                                     |     |                                                                                                                                                                                                                                                                                                                                                                                |                |
| 6  |                                                                     |     |                                                                                                                                                                                                                                                                                                                                                                                |                |
| 7  |                                                                     | 11d | Relevant concomitant care and interventions that are permitted or prohibited during the trial                                                                                                                                                                                                                                                                                  | 9              |
| 8  |                                                                     |     |                                                                                                                                                                                                                                                                                                                                                                                |                |
| 9  | Outcomes                                                            | 12  | Primary, secondary, and other outcomes, including the specific measurement variable (eg, systolic blood pressure), analysis metric (eg, change from baseline, final value, time to event), method of aggregation (eg, median, proportion), and time point for each outcome. Explanation of the clinical relevance of chosen efficacy and harm outcomes is strongly recommended | 12-14          |
| 10 |                                                                     |     |                                                                                                                                                                                                                                                                                                                                                                                |                |
| 11 |                                                                     |     |                                                                                                                                                                                                                                                                                                                                                                                |                |
| 12 |                                                                     |     |                                                                                                                                                                                                                                                                                                                                                                                |                |
| 13 |                                                                     |     |                                                                                                                                                                                                                                                                                                                                                                                |                |
| 14 | Participant timeline                                                | 13  | Time schedule of enrolment, interventions (including any run-ins and washouts), assessments, and visits for participants. A schematic diagram is highly recommended (see Figure)                                                                                                                                                                                               | Figure         |
| 15 |                                                                     |     |                                                                                                                                                                                                                                                                                                                                                                                |                |
| 16 |                                                                     |     |                                                                                                                                                                                                                                                                                                                                                                                |                |
| 17 | Sample size                                                         | 14  | Estimated number of participants needed to achieve study objectives and how it was determined, including clinical and statistical assumptions supporting any sample size calculations                                                                                                                                                                                          | 14             |
| 18 |                                                                     |     |                                                                                                                                                                                                                                                                                                                                                                                |                |
| 19 |                                                                     |     |                                                                                                                                                                                                                                                                                                                                                                                |                |
| 20 |                                                                     |     |                                                                                                                                                                                                                                                                                                                                                                                |                |
| 21 |                                                                     |     |                                                                                                                                                                                                                                                                                                                                                                                |                |
| 22 | Recruitment                                                         | 15  | Strategies for achieving adequate participant enrolment to reach target sample size                                                                                                                                                                                                                                                                                            | 9              |
| 23 |                                                                     |     |                                                                                                                                                                                                                                                                                                                                                                                |                |
| 24 | <b>Methods: Assignment of interventions (for controlled trials)</b> |     |                                                                                                                                                                                                                                                                                                                                                                                |                |
| 25 | Allocation:                                                         |     |                                                                                                                                                                                                                                                                                                                                                                                |                |
| 26 |                                                                     |     |                                                                                                                                                                                                                                                                                                                                                                                |                |
| 27 |                                                                     |     |                                                                                                                                                                                                                                                                                                                                                                                |                |
| 28 | Sequence generation                                                 | 16a | Method of generating the allocation sequence (eg, computer-generated random numbers), and list of any factors for stratification. To reduce predictability of a random sequence, details of any planned restriction (eg, blocking) should be provided in a separate document that is unavailable to those who enrol participants or assign interventions                       | Not applicable |
| 29 |                                                                     |     |                                                                                                                                                                                                                                                                                                                                                                                |                |
| 30 |                                                                     |     |                                                                                                                                                                                                                                                                                                                                                                                |                |
| 31 |                                                                     |     |                                                                                                                                                                                                                                                                                                                                                                                |                |
| 32 |                                                                     |     |                                                                                                                                                                                                                                                                                                                                                                                |                |
| 33 |                                                                     |     |                                                                                                                                                                                                                                                                                                                                                                                |                |
| 34 | Allocation concealment mechanism                                    | 16b | Mechanism of implementing the allocation sequence (eg, central telephone; sequentially numbered, opaque, sealed envelopes), describing any steps to conceal the sequence until interventions are assigned                                                                                                                                                                      | Not applicable |
| 35 |                                                                     |     |                                                                                                                                                                                                                                                                                                                                                                                |                |
| 36 |                                                                     |     |                                                                                                                                                                                                                                                                                                                                                                                |                |
| 37 |                                                                     |     |                                                                                                                                                                                                                                                                                                                                                                                |                |
| 38 |                                                                     |     |                                                                                                                                                                                                                                                                                                                                                                                |                |
| 39 |                                                                     |     |                                                                                                                                                                                                                                                                                                                                                                                |                |
| 40 |                                                                     |     |                                                                                                                                                                                                                                                                                                                                                                                |                |
| 41 |                                                                     |     |                                                                                                                                                                                                                                                                                                                                                                                |                |
| 42 |                                                                     |     |                                                                                                                                                                                                                                                                                                                                                                                |                |
| 43 |                                                                     |     |                                                                                                                                                                                                                                                                                                                                                                                |                |
| 44 |                                                                     |     |                                                                                                                                                                                                                                                                                                                                                                                |                |
| 45 |                                                                     |     |                                                                                                                                                                                                                                                                                                                                                                                |                |
| 46 |                                                                     |     |                                                                                                                                                                                                                                                                                                                                                                                |                |

1  
2  
3  
4  
5  
6  
7  
8  
9  
10  
11  
12  
13  
14  
15  
16  
17  
18  
19  
20  
21  
22  
23  
24  
25  
26  
27  
28  
29  
30  
31  
32  
33  
34  
35  
36  
37  
38  
39  
40  
41  
42  
43  
44  
45  
46

|                    |     |                                                                                                                                                      |                |
|--------------------|-----|------------------------------------------------------------------------------------------------------------------------------------------------------|----------------|
| Implementation     | 16c | Who will generate the allocation sequence, who will enrol participants, and who will assign participants to interventions                            | Not applicable |
| Blinding (masking) | 17a | Who will be blinded after assignment to interventions (eg, trial participants, care providers, outcome assessors, data analysts), and how            | Not applicable |
|                    | 17b | If blinded, circumstances under which unblinding is permissible, and procedure for revealing a participant’s allocated intervention during the trial | Not applicable |

**Methods: Data collection, management, and analysis**

|                         |     |                                                                                                                                                                                                                                                                                                                                                                                                              |            |
|-------------------------|-----|--------------------------------------------------------------------------------------------------------------------------------------------------------------------------------------------------------------------------------------------------------------------------------------------------------------------------------------------------------------------------------------------------------------|------------|
| Data collection methods | 18a | Plans for assessment and collection of outcome, baseline, and other trial data, including any related processes to promote data quality (eg, duplicate measurements, training of assessors) and a description of study instruments (eg, questionnaires, laboratory tests) along with their reliability and validity, if known. Reference to where data collection forms can be found, if not in the protocol | 11, 14, 15 |
|                         | 18b | Plans to promote participant retention and complete follow-up, including list of any outcome data to be collected for participants who discontinue or deviate from intervention protocols                                                                                                                                                                                                                    | 14, 15     |
| Data management         | 19  | Plans for data entry, coding, security, and storage, including any related processes to promote data quality (eg, double data entry; range checks for data values). Reference to where details of data management procedures can be found, if not in the protocol                                                                                                                                            | 11, 14, 15 |
| Statistical methods     | 20a | Statistical methods for analysing primary and secondary outcomes. Reference to where other details of the statistical analysis plan can be found, if not in the protocol                                                                                                                                                                                                                                     | 15-17      |
|                         | 20b | Methods for any additional analyses (eg, subgroup and adjusted analyses)                                                                                                                                                                                                                                                                                                                                     | 15-17      |
|                         | 20c | Definition of analysis population relating to protocol non-adherence (eg, as randomised analysis), and any statistical methods to handle missing data (eg, multiple imputation)                                                                                                                                                                                                                              | 15         |

**Methods: Monitoring**

|    |                                 |     |                                                                                                                                                                                                                                                                                                                                       |                |
|----|---------------------------------|-----|---------------------------------------------------------------------------------------------------------------------------------------------------------------------------------------------------------------------------------------------------------------------------------------------------------------------------------------|----------------|
| 1  |                                 |     |                                                                                                                                                                                                                                                                                                                                       |                |
| 2  |                                 |     |                                                                                                                                                                                                                                                                                                                                       |                |
| 3  |                                 |     |                                                                                                                                                                                                                                                                                                                                       |                |
| 4  | Data monitoring                 | 21a | Composition of data monitoring committee (DMC); summary of its role and reporting structure; statement of whether it is independent from the sponsor and competing interests; and reference to where further details about its charter can be found, if not in the protocol. Alternatively, an explanation of why a DMC is not needed | 22             |
| 5  |                                 |     |                                                                                                                                                                                                                                                                                                                                       |                |
| 6  |                                 |     |                                                                                                                                                                                                                                                                                                                                       |                |
| 7  |                                 |     |                                                                                                                                                                                                                                                                                                                                       |                |
| 8  |                                 |     |                                                                                                                                                                                                                                                                                                                                       |                |
| 9  |                                 | 21b | Description of any interim analyses and stopping guidelines, including who will have access to these interim results and make the final decision to terminate the trial                                                                                                                                                               | Not applicable |
| 10 |                                 |     |                                                                                                                                                                                                                                                                                                                                       |                |
| 11 |                                 |     |                                                                                                                                                                                                                                                                                                                                       |                |
| 12 | Harms                           | 22  | Plans for collecting, assessing, reporting, and managing solicited and spontaneously reported adverse events and other unintended effects of trial interventions or trial conduct                                                                                                                                                     | 14, 15         |
| 13 |                                 |     |                                                                                                                                                                                                                                                                                                                                       |                |
| 14 |                                 |     |                                                                                                                                                                                                                                                                                                                                       |                |
| 15 | Auditing                        | 23  | Frequency and procedures for auditing trial conduct, if any, and whether the process will be independent from investigators and the sponsor                                                                                                                                                                                           | 22             |
| 16 |                                 |     |                                                                                                                                                                                                                                                                                                                                       |                |
| 17 |                                 |     |                                                                                                                                                                                                                                                                                                                                       |                |
| 18 |                                 |     |                                                                                                                                                                                                                                                                                                                                       |                |
| 19 | <b>Ethics and dissemination</b> |     |                                                                                                                                                                                                                                                                                                                                       |                |
| 20 |                                 |     |                                                                                                                                                                                                                                                                                                                                       |                |
| 21 | Research ethics approval        | 24  | Plans for seeking research ethics committee/institutional review board (REC/IRB) approval                                                                                                                                                                                                                                             | 22             |
| 22 |                                 |     |                                                                                                                                                                                                                                                                                                                                       |                |
| 23 | Protocol amendments             | 25  | Plans for communicating important protocol modifications (eg, changes to eligibility criteria, outcomes, analyses) to relevant parties (eg, investigators, REC/IRBs, trial participants, trial registries, journals, regulators)                                                                                                      | 22             |
| 24 |                                 |     |                                                                                                                                                                                                                                                                                                                                       |                |
| 25 |                                 |     |                                                                                                                                                                                                                                                                                                                                       |                |
| 26 |                                 |     |                                                                                                                                                                                                                                                                                                                                       |                |
| 27 | Consent or assent               | 26a | Who will obtain informed consent or assent from potential trial participants or authorised surrogates, and how (see Item 32)                                                                                                                                                                                                          | 22             |
| 28 |                                 |     |                                                                                                                                                                                                                                                                                                                                       |                |
| 29 |                                 |     |                                                                                                                                                                                                                                                                                                                                       |                |
| 30 |                                 |     |                                                                                                                                                                                                                                                                                                                                       |                |
| 31 |                                 | 26b | Additional consent provisions for collection and use of participant data and biological specimens in ancillary studies, if applicable                                                                                                                                                                                                 | Not applicable |
| 32 |                                 |     |                                                                                                                                                                                                                                                                                                                                       |                |
| 33 |                                 |     |                                                                                                                                                                                                                                                                                                                                       |                |
| 34 | Confidentiality                 | 27  | How personal information about potential and enrolled participants will be collected, shared, and maintained in order to protect confidentiality before, during, and after the trial                                                                                                                                                  | 11, 14-17      |
| 35 |                                 |     |                                                                                                                                                                                                                                                                                                                                       |                |
| 36 |                                 |     |                                                                                                                                                                                                                                                                                                                                       |                |
| 37 | Declaration of interests        | 28  | Financial and other competing interests for principal investigators for the overall trial and each study site                                                                                                                                                                                                                         | 22             |
| 38 |                                 |     |                                                                                                                                                                                                                                                                                                                                       |                |
| 39 |                                 |     |                                                                                                                                                                                                                                                                                                                                       |                |
| 40 |                                 |     |                                                                                                                                                                                                                                                                                                                                       |                |
| 41 |                                 |     |                                                                                                                                                                                                                                                                                                                                       |                |
| 42 |                                 |     |                                                                                                                                                                                                                                                                                                                                       |                |
| 43 |                                 |     |                                                                                                                                                                                                                                                                                                                                       |                |
| 44 |                                 |     |                                                                                                                                                                                                                                                                                                                                       |                |
| 45 |                                 |     |                                                                                                                                                                                                                                                                                                                                       |                |
| 46 |                                 |     |                                                                                                                                                                                                                                                                                                                                       |                |



1  
2  
3  
4  
5  
6  
7  
8  
9  
10  
11  
12  
13  
14  
15  
16  
17  
18  
19  
20  
21  
22  
23  
24  
25  
26  
27  
28  
29  
30  
31  
32  
33  
34  
35  
36  
37  
38  
39  
40  
41  
42  
43  
44  
45  
46

|                               |     |                                                                                                                                                                                                                                                                                     |                        |
|-------------------------------|-----|-------------------------------------------------------------------------------------------------------------------------------------------------------------------------------------------------------------------------------------------------------------------------------------|------------------------|
| Access to data                | 29  | Statement of who will have access to the final trial dataset, and disclosure of contractual agreements that limit such access for investigators                                                                                                                                     | 22                     |
| Ancillary and post-trial care | 30  | Provisions, if any, for ancillary and post-trial care, and for compensation to those who suffer harm from trial participation                                                                                                                                                       | Not applicable         |
| Dissemination policy          | 31a | Plans for investigators and sponsor to communicate trial results to participants, healthcare professionals, the public, and other relevant groups (eg, via publication, reporting in results databases, or other data sharing arrangements), including any publication restrictions | 23                     |
|                               | 31b | Authorship eligibility guidelines and any intended use of professional writers                                                                                                                                                                                                      | 23                     |
|                               | 31c | Plans, if any, for granting public access to the full protocol, participant-level dataset, and statistical code                                                                                                                                                                     | 22                     |
| <b>Appendices</b>             |     |                                                                                                                                                                                                                                                                                     |                        |
| Informed consent materials    | 32  | Model consent form and other related documentation given to participants and authorised surrogates                                                                                                                                                                                  | Available upon request |
| Biological specimens          | 33  | Plans for collection, laboratory evaluation, and storage of biological specimens for genetic or molecular analysis in the current trial and for future use in ancillary studies, if applicable                                                                                      | Not applicable         |

---

\*It is strongly recommended that this checklist be read in conjunction with the SPIRIT 2013 Explanation & Elaboration for important clarification on the items. Amendments to the protocol should be tracked and dated. The SPIRIT checklist is copyrighted by the SPIRIT Group under the Creative Commons "[Attribution-NonCommercial-NoDerivs 3.0 Unported](https://creativecommons.org/licenses/by-nc-nd/3.0/)" license.

# BMJ Open

## The role of endoscopic ultrasonography in the diagnostic work-up of idiopathic acute pancreatitis (PICUS): study protocol for a nationwide prospective cohort study

|                               |                                                                                                                                                                                                                                                                                                                                                                                                                                                                                                                                                                                                                                                                                                                                                                                                                                                                                                                                                                                                                                                                                                                                                                                                                                                                                                                                                                                                                                                                                                                                                                                                                                                                                                                                                                                                                                                                                                                                            |
|-------------------------------|--------------------------------------------------------------------------------------------------------------------------------------------------------------------------------------------------------------------------------------------------------------------------------------------------------------------------------------------------------------------------------------------------------------------------------------------------------------------------------------------------------------------------------------------------------------------------------------------------------------------------------------------------------------------------------------------------------------------------------------------------------------------------------------------------------------------------------------------------------------------------------------------------------------------------------------------------------------------------------------------------------------------------------------------------------------------------------------------------------------------------------------------------------------------------------------------------------------------------------------------------------------------------------------------------------------------------------------------------------------------------------------------------------------------------------------------------------------------------------------------------------------------------------------------------------------------------------------------------------------------------------------------------------------------------------------------------------------------------------------------------------------------------------------------------------------------------------------------------------------------------------------------------------------------------------------------|
| Journal:                      | <i>BMJ Open</i>                                                                                                                                                                                                                                                                                                                                                                                                                                                                                                                                                                                                                                                                                                                                                                                                                                                                                                                                                                                                                                                                                                                                                                                                                                                                                                                                                                                                                                                                                                                                                                                                                                                                                                                                                                                                                                                                                                                            |
| Manuscript ID                 | bmjopen-2019-035504.R1                                                                                                                                                                                                                                                                                                                                                                                                                                                                                                                                                                                                                                                                                                                                                                                                                                                                                                                                                                                                                                                                                                                                                                                                                                                                                                                                                                                                                                                                                                                                                                                                                                                                                                                                                                                                                                                                                                                     |
| Article Type:                 | Protocol                                                                                                                                                                                                                                                                                                                                                                                                                                                                                                                                                                                                                                                                                                                                                                                                                                                                                                                                                                                                                                                                                                                                                                                                                                                                                                                                                                                                                                                                                                                                                                                                                                                                                                                                                                                                                                                                                                                                   |
| Date Submitted by the Author: | 02-Mar-2020                                                                                                                                                                                                                                                                                                                                                                                                                                                                                                                                                                                                                                                                                                                                                                                                                                                                                                                                                                                                                                                                                                                                                                                                                                                                                                                                                                                                                                                                                                                                                                                                                                                                                                                                                                                                                                                                                                                                |
| Complete List of Authors:     | <p>Umans, Devica; Amsterdam University Medical Centres, Department of Gastroenterology and Hepatology; Saint Antonius Hospital, Research and Development</p> <p>Timmerhuis, Hester; Saint Antonius Hospital, Department of Surgery; Saint Antonius Hospital, Research and Development</p> <p>Hallensleben, Nora ; Erasmus Medical Center, Department of Gastroenterology and Hepatology; Saint Antonius Hospital, Research and Development</p> <p>Bouwense, Stefan; Maastricht UMC+, Department of Surgery</p> <p>Anten, Marie-Paule; Franciscus Gasthuis en Vlietland, Department of Gastroenterology and Hepatology</p> <p>Bhalla, Abha; HagaZiekenhuis, Department of Gastroenterology and Hepatology</p> <p>Bijlsma, Rina; Martini Ziekenhuis, Department of Gastroenterology and Hepatology</p> <p>Boermeester, Marja; Amsterdam University Medical Centres, Department of Surgery</p> <p>Brink, Menno; Meander MC, Department of Gastroenterology and Hepatology</p> <p>Hol, Lieke; Maasstad Hospital, Department of Gastroenterology and Hepatology</p> <p>Bruno, Marco; Erasmus Medical Center, Department of Gastroenterology and Hepatology</p> <p>Curvers, Wouter; Catharina Hospital, Department of Gastroenterology and Hepatology</p> <p>van Dullemen, Hendrik; UMCG, Department of Gastroenterology and Hepatology</p> <p>van Eijck, Brechje; Spaarne Gasthuis, Department of Gastroenterology and Hepatology</p> <p>Erkelens, G; Gelre Ziekenhuizen, Department of Gastroenterology and Hepatology</p> <p>Fockens, Paul; Amsterdam University Medical Centres, Department of Gastroenterology and Hepatology</p> <p>van Geenen, Erwin; Radboudumc</p> <p>Hazen, Wouter; Elisabeth-TweeSteden Ziekenhuis, Department of Gastroenterology and Hepatology</p> <p>Hoge, Chantal; Maastricht UMC+, Department of Gastroenterology and Hepatology</p> <p>Inderson, Akin; LUMC, Department of Gastroenterology and Hepatology</p> |

|                                 |                                                                                                                                                                                                                                                                                                                                                                                                                                                                                                                                                                                                                                                                                                                                                                                                                                                                                                                                                                                                                                                                                                                                                                                                                                                                                                                                                                                                                                                                                                                                |
|---------------------------------|--------------------------------------------------------------------------------------------------------------------------------------------------------------------------------------------------------------------------------------------------------------------------------------------------------------------------------------------------------------------------------------------------------------------------------------------------------------------------------------------------------------------------------------------------------------------------------------------------------------------------------------------------------------------------------------------------------------------------------------------------------------------------------------------------------------------------------------------------------------------------------------------------------------------------------------------------------------------------------------------------------------------------------------------------------------------------------------------------------------------------------------------------------------------------------------------------------------------------------------------------------------------------------------------------------------------------------------------------------------------------------------------------------------------------------------------------------------------------------------------------------------------------------|
|                                 | <p>Kager, Liesbeth; Noordwest Ziekenhuisgroep, Department of Gastroenterology and Hepatology</p> <p>Kuiken, Sjoerd; OLVG, Department of Gastroenterology and Hepatology</p> <p>Perk, Lars; Medisch Centrum Haaglanden, Department of Gastroenterology and Hepatology</p> <p>Poley, Jan-Werner</p> <p>Quispel, Rutger; Reinier de Graaf Groep, Department of Gastroenterology and Hepatology</p> <p>Römkens, Tessa; Jeroen Bosch Hospital, Department of Gastroenterology and Hepatology</p> <p>van Santvoort, Hjalmar ; University Medical Center Utrecht; Saint Antonius Hospital, Department of Surgery</p> <p>Tan, Adriaan; Canisius Wilhelmina Hospital, Department of Gastroenterology and Hepatology</p> <p>Thijssen, Annemieke; Albert Schweitzer Ziekenhuis, Department of Gastroenterology and Hepatology</p> <p>Venneman, Niels ; Medisch Spectrum Twente, Department of Gastroenterology and Hepatology</p> <p>Vleggaar, Frank; Universitair Medisch Centrum Utrecht</p> <p>Voorburg, Annet ; Diaconessenhuis Utrecht Zeist Doorn, Department of Gastroenterology and Hepatology</p> <p>van Wanrooij, Roy; Amsterdam University Medical Centres, Department of Gastroenterology and Hepatology</p> <p>Witteman, Ben; Ziekenhuis Gelderse Vallei, Department of Gastroenterology and Hepatology</p> <p>Verdonk, Robert; Saint Antonius Hospital, Department of Gastroenterology and Hepatology</p> <p>Besselink, Marc; Amsterdam University Medical Centres, Department of Surgery</p> <p>van Hooft, Jeanin; AMC</p> |
| <b>Primary Subject Heading</b>: | Gastroenterology and hepatology                                                                                                                                                                                                                                                                                                                                                                                                                                                                                                                                                                                                                                                                                                                                                                                                                                                                                                                                                                                                                                                                                                                                                                                                                                                                                                                                                                                                                                                                                                |
| Secondary Subject Heading:      | Evidence based practice, Research methods                                                                                                                                                                                                                                                                                                                                                                                                                                                                                                                                                                                                                                                                                                                                                                                                                                                                                                                                                                                                                                                                                                                                                                                                                                                                                                                                                                                                                                                                                      |
| Keywords:                       | Endoscopy < GASTROENTEROLOGY, Hepatobiliary disease < GASTROENTEROLOGY, Pancreatic disease < GASTROENTEROLOGY                                                                                                                                                                                                                                                                                                                                                                                                                                                                                                                                                                                                                                                                                                                                                                                                                                                                                                                                                                                                                                                                                                                                                                                                                                                                                                                                                                                                                  |
|                                 |                                                                                                                                                                                                                                                                                                                                                                                                                                                                                                                                                                                                                                                                                                                                                                                                                                                                                                                                                                                                                                                                                                                                                                                                                                                                                                                                                                                                                                                                                                                                |

SCHOLARONE™  
Manuscripts

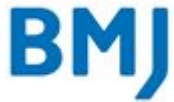

I, the Submitting Author has the right to grant and does grant on behalf of all authors of the Work (as defined in the below author licence), an exclusive licence and/or a non-exclusive licence for contributions from authors who are: i) UK Crown employees; ii) where BMJ has agreed a CC-BY licence shall apply, and/or iii) in accordance with the terms applicable for US Federal Government officers or employees acting as part of their official duties; on a worldwide, perpetual, irrevocable, royalty-free basis to BMJ Publishing Group Ltd ("BMJ") its licensees and where the relevant Journal is co-owned by BMJ to the co-owners of the Journal, to publish the Work in this journal and any other BMJ products and to exploit all rights, as set out in our [licence](#).

The Submitting Author accepts and understands that any supply made under these terms is made by BMJ to the Submitting Author unless you are acting as an employee on behalf of your employer or a postgraduate student of an affiliated institution which is paying any applicable article publishing charge ("APC") for Open Access articles. Where the Submitting Author wishes to make the Work available on an Open Access basis (and intends to pay the relevant APC), the terms of reuse of such Open Access shall be governed by a Creative Commons licence – details of these licences and which [Creative Commons](#) licence will apply to this Work are set out in our licence referred to above.

Other than as permitted in any relevant BMJ Author's Self Archiving Policies, I confirm this Work has not been accepted for publication elsewhere, is not being considered for publication elsewhere and does not duplicate material already published. I confirm all authors consent to publication of this Work and authorise the granting of this licence.

1  
2  
3  
4 1 The role of endoscopic ultrasonography in the diagnostic work-up of  
5  
6  
7 2 idiopathic acute pancreatitis (PICUS): study protocol for a nationwide  
8  
9  
10  
11 3 prospective cohort study  
12  
13  
14 4

15  
16 5 Devica S Umans<sup>1,2</sup>, Hester C Timmerhuis<sup>2,3</sup>, Nora DL Hallensleben<sup>2,4</sup>, Stefan A Bouwense<sup>5</sup>, Marie-Paule  
17  
18 6 GF Anten<sup>6</sup>, Abha Bhalla<sup>7</sup>, Rina A Bijlsma<sup>8</sup>, Marja A Boermeester<sup>9</sup>, Menno A Brink<sup>10</sup>, Lieke Hol<sup>11</sup>, Marco J  
19  
20 7 Bruno<sup>4</sup>, Wouter L Curvers<sup>12</sup>, Hendrik M van Dullemen<sup>13</sup>, Brechje C van Eijck<sup>14</sup>, G Willemien Erkelens<sup>15</sup>,  
21  
22 8 Paul Fockens<sup>1</sup>, Erwin JM van Geenen<sup>16</sup>, Wouter L Hazen<sup>17</sup>, Chantal V Hoge<sup>18</sup>, Akin Inderson<sup>19</sup>, Liesbeth  
23  
24 9 M Kager<sup>20</sup>, Sjoerd D Kuiken<sup>21</sup>, Lars E Perk<sup>22</sup>, Jan-Werner Poley<sup>4</sup>, Rutger Quispel<sup>23</sup>, Tessa EH Römken<sup>24</sup>,  
25  
26 10 Hjalmar C van Santvoort<sup>3,25</sup>, Adriaan CITL Tan<sup>26</sup>, Annemieke Y Thijssen<sup>27</sup>, Niels G Venneman<sup>28</sup>, Frank P  
27  
28 11 Vleggaar<sup>29</sup>, Annet MCJ Voorburg<sup>30</sup>, Roy LJ van Wanrooij<sup>31</sup>, Ben J Witteman<sup>32</sup>, Robert C Verdonk<sup>33</sup>, Marc  
29  
30 12 G Besselink<sup>8</sup>, Jeanin E van Hooft<sup>1</sup>, for the Dutch Pancreatitis Study Group  
31  
32  
33  
34  
35  
36  
37  
38  
39  
40  
41  
42  
43  
44  
45  
46  
47  
48  
49  
50  
51  
52  
53  
54  
55  
56  
57  
58  
59  
60

14 <sup>1</sup> Department of Gastroenterology and Hepatology, Amsterdam Gastroenterology and Metabolism, Amsterdam UMC,  
15 University of Amsterdam, Amsterdam, the Netherlands

16 <sup>2</sup> Department of Research and Development, St. Antonius Hospital, Nieuwegein, the Netherlands

17 <sup>3</sup> Department of Surgery, St. Antonius Hospital, Nieuwegein, the Netherlands

18 <sup>4</sup> Department of Gastroenterology and Hepatology, Erasmus Medical Center, Rotterdam, the Netherlands

19 <sup>5</sup> Department of Surgery, Maastricht UMC+, Maastricht, the Netherlands

20 <sup>6</sup> Department of Gastroenterology and Hepatology, Franciscus Gasthuis & Vlietland, Rotterdam, the Netherlands

21 <sup>7</sup> Department of Gastroenterology and Hepatology, Haga Hospital, Den Haag, the Netherlands

22 <sup>8</sup> Department of Gastroenterology and Hepatology, Martini Hospital, Groningen, the Netherlands

23 <sup>9</sup> Department of Surgery, Amsterdam UMC, University of Amsterdam, Amsterdam, the Netherlands

- 1  
2  
3 24 <sup>10</sup> Department of Gastroenterology and Hepatology, Meander Medical Center, Amersfoort, the Netherlands  
4  
5 25 <sup>11</sup> Department of Gastroenterology and Hepatology, Maasstad Hospital, Rotterdam, the Netherlands  
6  
7  
8 26 <sup>12</sup> Department of Gastroenterology and Hepatology, Catharina Hospital, Eindhoven, the Netherlands  
9  
10 27 <sup>13</sup> Department of Gastroenterology and Hepatology, University Medical Center Groningen, Groningen, the Netherlands  
11  
12  
13 28 <sup>14</sup> Department of Gastroenterology and Hepatology, Spaarne Gasthuis, Haarlem, the Netherlands  
14  
15 29 <sup>15</sup> Department of Gastroenterology and Hepatology, Gelre Hospital, Apeldoorn, the Netherlands  
16  
17  
18 30 <sup>16</sup> Department of Gastroenterology and Hepatology, Radboud university medical center, Nijmegen, the Netherlands  
19  
20 31 <sup>17</sup> Department of Gastroenterology and Hepatology, Elisabeth-Tweesteden Hospital, Tilburg, the Netherlands  
21  
22  
23 32 <sup>18</sup> Department of Gastroenterology and Hepatology, Maastricht University Medical Center, Maastricht, the Netherlands  
24  
25 33 <sup>19</sup> Department of Gastroenterology and Hepatology, Leiden University Medical Center, Leiden, the Netherlands  
26  
27  
28 34 <sup>20</sup> Department of Gastroenterology and Hepatology, Noordwest Ziekenhuisgroep, Alkmaar, the Netherlands  
29  
30 35 <sup>21</sup> Department of Gastroenterology and Hepatology, OLVG, Amsterdam, the Netherlands  
31  
32  
33 36 <sup>22</sup> Department of Gastroenterology and Hepatology, Medical Center Haaglanden, Den Haag, the Netherlands  
34  
35 37 <sup>23</sup> Department of Gastroenterology and Hepatology, Reinier de Graaf Gasthuis, Delft, the Netherlands  
36  
37  
38 38 <sup>24</sup> Department of Gastroenterology and Hepatology, Jeroen Bosch Hospital, Den Bosch, the Netherlands  
39  
40 39 <sup>25</sup> Department of Surgery, UMC Utrecht, Utrecht, the Netherlands  
41  
42  
43 40 <sup>26</sup> Department of Gastroenterology and Hepatology, Canisius-Wilhelmina Hospital, Nijmegen, the Netherlands  
44  
45 41 <sup>27</sup> Department of Gastroenterology and Hepatology, Albert Schweitzer Hospital, Dordrecht, the Netherlands  
46  
47  
48 42 <sup>28</sup> Department of Gastroenterology and Hepatology, Medisch Spectrum Twente, Enschede, the Netherlands  
49  
50 43 <sup>29</sup> Department of Gastroenterology and Hepatology, University Medical Center Utrecht, the Netherlands  
51  
52  
53 44 <sup>30</sup> Department of Gastroenterology and Hepatology, Diaconessenhuis, Utrecht, the Netherlands  
54  
55 45 <sup>31</sup> Department of Gastroenterology and Hepatology, Amsterdam Gastroenterology and Metabolism, Amsterdam UMC, Vrije  
56  
57 46 Universiteit van Amsterdam, Amsterdam, the Netherlands  
58  
59 47 <sup>32</sup> Department of Gastroenterology and Hepatology, Hospital Gelderse Vallei, Ede, the Netherlands  
60

1  
2  
3 48 <sup>33</sup> Department of Gastroenterology and Hepatology, St. Antonius Hospital, Nieuwegein, the Netherlands  
4  
5  
6 49  
7  
8 50 Correspondence  
9

10 51 Dr. Jeanin E. van Hooft, MD, PhD, MBA  
11  
12

13 52 Amsterdam UMC, location AMC  
14  
15

16 53 Department of Gastroenterology and Hepatology, C2-115  
17  
18

19 54 PO Box 22660  
20  
21

22 55 1100 DD Amsterdam  
23  
24

25 56 The Netherlands  
26  
27

28 57 Telephone: +31 20 566 7918  
29  
30

31 58 E-mail: j.e.vanhooft@amsterdamumc.nl / j.e.van\_hooft@lumc.nl  
32  
33

34 59  
35

36 60 Correspondence during review phase  
37  
38

39 61 Devica S Umans  
40  
41

42 62 Telephone: +31 88 320 7051  
43  
44

45 63 E-mail: d.s.umans@amsterdamumc.nl  
46  
47

48 64  
49

50 65  
51  
52

53 66 List of abbreviations  
54  
55

56 67 ALT = alanine aminotransferase  
57  
58

59 68 BMI = body mass index  
60

1  
2  
3 69 CI = confidence interval  
4  
5

6 70 CRF = case report form  
7  
8

9 71 CT = computed tomography  
10  
11

12 72 ERCP = endoscopic retrograde cholangiopancreatography  
13  
14

15 73 EUS = endoscopic ultrasonography  
16  
17

18 74 GRADE = Grading of Recommendations Assessment, Development and Evaluation  
19  
20

21 75 IAP = idiopathic acute pancreatitis  
22  
23

24 76 IAP/APA = International Association of Pancreatology/American Pancreatic Association  
25  
26

27 77 IPMN = intraductal papillary mucinous neoplasm  
28  
29

30 78 IQR = interquartile range  
31  
32

33 79 MRCP = magnetic resonance cholangiopancreatography  
34  
35

36 80 MRI = magnetic resonance imaging  
37  
38

39 81  
40  
41

42 82  
43  
44

45 83 **Word count**

46 84 Word count excluding title page, abstract, article summary (strengths and limitations), key words,  
47  
48

49 85 tables, figure legend, author statement and references: 3546  
50  
51

52 86  
53  
54

55 87  
56  
57  
58  
59  
60



1  
2  
3 88 Abstract  
4

5  
6 89 Introduction  
7

8 90 Idiopathic acute pancreatitis (IAP) remains a dilemma for physicians as it is uncertain whether patients  
9  
10 91 with IAP may actually have an occult etiology. It is unclear to what extent additional diagnostic  
11  
12 92 modalities such as endoscopic ultrasonography (EUS) are warranted after a first episode of IAP in order  
13  
14 93 to uncover this etiology. Failure to timely determine treatable etiologies delays appropriate treatment  
15  
16 94 and might subsequently cause recurrence of acute pancreatitis. Therefore, the aim of the “Pancreatitis  
17  
18 95 of Idiopathic origin: Clinical added value of endoscopic UltraSonography” (PICUS) study is to determine  
19  
20 96 the value of routine EUS in determining the etiology of pancreatitis in patients with a first episode of  
21  
22 97 IAP.  
23  
24  
25  
26  
27  
28  
29

30 99 Methods and analysis

31  
32 100 PICUS is designed as a multicenter prospective cohort study of 106 patients with a first episode of IAP  
33  
34 101 after complete standard diagnostic work-up, in whom a diagnostic EUS will be performed. Standard  
35  
36 102 diagnostic work-up will include a complete personal and family history, laboratory tests including  
37  
38 103 serum alanine aminotransferase, calcium and triglyceride levels, and imaging by transabdominal  
39  
40 104 ultrasound, magnetic resonance imaging or magnetic resonance cholangiopancreatography after  
41  
42 105 clinical recovery from the acute pancreatitis episode. The primary outcome measure is detection of  
43  
44 106 etiology by EUS. Secondary outcome measures include pancreatitis recurrence rate, severity of  
45  
46 107 recurrent pancreatitis, readmission, additional interventions, complications, length of hospital stay,  
47  
48 108 quality of life, mortality and costs, during a follow-up period of 12 months.  
49  
50  
51  
52  
53  
54  
55  
56  
57  
58  
59  
60

1  
2  
3 110 Ethics and dissemination  
4

5 111 PICUS is conducted according to the Declaration of Helsinki and Guideline for Good Clinical Practice.  
6

7  
8 112 Five Medical Ethics Review Committees assessed PICUS. The results will be submitted for publication  
9

10 113 in an international peer-reviewed journal.  
11  
12

13 114  
14

15  
16 115 Trial registration  
17

18 116 Netherlands Trial Register: NL7066, June 9<sup>th</sup> 2018. Prospectively registered.  
19  
20

21 117  
22

23  
24 118  
25  
26

27 119 Article summary: strengths and limitations  
28

29  
30 120 • This is the first prospective cohort study of only patients with a single episode of presumed  
31 121 IAP.  
32  
33

34 122 • This is the first prospective cohort study which only includes patients after complete  
35 123 standard diagnostic work-up (including exclusion based on blood serum ALT and imaging  
36 124 after clinical recovery).  
37  
38

39 125 • The multicenter nature of this study reduces the risk of patient selection bias.  
40  
41

42 126 • By following patients for a year after EUS, this study could establish the association between  
43 127 EUS, detection of etiology and subsequent treatment of etiology, and pancreatitis  
44 128 recurrence.  
45  
46

47 129 • As the timing of the EUS is set to be after clinical recovery from pancreatitis in this trial, no  
48 130 conclusions on the diagnostic yield of EUS in a different time frame can be drawn from this  
49 131 study.  
50  
51

52 132  
53  
54  
55  
56  
57  
58  
59  
60

1  
2  
3 133 **Keywords**  
4

5  
6 134 Idiopathic acute pancreatitis; endoscopic ultrasonography, etiology  
7  
8

9 135  
10  
11

12 136  
13  
14

15 137 **Background**  
16

17 138 Acute pancreatitis can be induced by numerous causes. Gallstone disease (approximately 50%) and  
18  
19 139 alcohol (approximately 20%) are the most frequent causes (1-6), although the prevalence of etiologies  
20  
21  
22 140 of acute pancreatitis is dependent on, among other things, age and geographical factors (7-10). There  
23  
24 141 is, however, a considerable group of patients of approximately 25% in whom no etiology can be found  
25  
26 142 after routine diagnostic work-up (i.e. medical history, laboratory investigations and transabdominal  
27  
28 143 ultrasound). These patients are considered to have presumed idiopathic acute pancreatitis (IAP) (3).  
29  
30

31  
32 144 When IAP is presumed, guidelines recommend repeat transabdominal ultrasound after  
33  
34 145 discharge (11, 12). This repeat ultrasonography has an additional diagnostic yield of 20% for the  
35  
36 146 detection of gallstones or sludge in these patients (13). Undetected microlithiasis and biliary sludge  
37  
38 147 are generally considered to be the major cause of presumed IAP (14, 15). Undetected and subsequently  
39  
40 148 untreated gallstone disease poses a risk for recurrent acute pancreatitis and other biliary events, e.g.  
41  
42 149 cholecystitis, biliary colic's and cholangitis.  
43  
44  
45

46 150 Therefore, when previous diagnostics failed to uncover an etiology, endoscopic  
47  
48 151 ultrasonography (EUS) should be considered for the detection of biliary disease or other abnormalities  
49  
50 152 causing pancreatitis, such as neoplasms and chronic pancreatitis (11, 12, 16, 17). EUS is advised as the  
51  
52 153 first step in presumed IAP, followed by (secretin-enhanced) magnetic resonance  
53  
54 154 cholangiopancreaticography (MRCP) to identify rare morphologic abnormalities (11), as EUS is  
55  
56 155 considered to have a higher diagnostic yield than MRCP for clinically relevant causes (18).  
57  
58  
59  
60

1  
2  
3 156 Although guidelines do recommend performing EUS after a first or second attack of presumed  
4  
5 157 IAP, this recommendation is scored as a mere grade 2C, according to the Grading of Recommendations  
6  
7 158 Assessment, Development and Evaluation (GRADE) classification (19) (indicating a weak  
8  
9  
10 159 recommendation based on evidence of low quality, with weak agreement among experts in this field)  
11  
12 160 (11). Therefore, EUS is not routinely performed as the exact significance in this patient group is unclear  
13  
14 161 (11, 16).

15  
16  
17 162 The PICUS study was designed to determine whether routine EUS should be incorporated in  
18  
19 163 the standard diagnostic work-up of a first episode of presumed IAP.  
20  
21  
22  
23 164  
24  
25 165  
26  
27

## 28 166 Methods and analysis

### 29 167 Study aim

30  
31 168 The objective of this study is to determine the diagnostic yield of EUS for the detection of etiology in  
32  
33 169 patients with a first episode of presumed IAP.  
34  
35  
36  
37  
38

39 170 Depending on the diagnostic yield of EUS observed in the PICUS study, incorporation of EUS  
40  
41 171 in routine diagnostic work-up of patients with a first episode of presumed IAP will be considered. A  
42  
43 172 minimal diagnostic yield of 10% for any etiology will be regarded as reasonable to justify implementing  
44  
45 173 routine EUS in the standard diagnostic work-up of a first episode of presumed IAP.  
46  
47  
48  
49 174

### 50 51 175 Study design and setting

52  
53 176 PICUS is a multicenter prospective cohort study. A total of 106 patients will be included from 28  
54  
55 177 participating Dutch centers, including all 8 university centers and 20 large teaching hospitals. A listing  
56  
57  
58  
59  
60

1  
2  
3 178 of the participating centers is included in the Authors' information. An overview of the study design,  
4  
5 179 including screening procedures and follow-up, is provided in figure 1.  
6  
7

8 180

## 11 181 Study population

13 182 The subjects of this study have had a first episode of acute pancreatitis, as defined by the 2012 Revised  
14  
15 183 Atlanta criteria (20), with an unknown origin after standard diagnostic work-up, according to the 2013  
16  
17 184 International Association of Pancreatology/American Pancreatic Association (IAP/APA) evidence-  
18  
19 185 based guidelines on management of acute pancreatitis (11). The diagnostic modalities that constitute  
20  
21 186 standard diagnostic work-up are listed in table 1 and additional file 1. The diagnostic tests as laid out  
22  
23 187 in table 1 are to be performed in all subjects and these tests cannot show any signs of an etiology in  
24  
25 188 all subjects. Potential etiologies and their definitions are listed in table 2 and additional file 1.  
26  
27  
28  
29

30 189

## 32 190 Eligibility criteria

34 191 The inclusion criteria are:

- 36  
37 192 1. Patients of 18 years or older  
38  
39 193 2. First episode of presumed IAP after standard diagnostic work-up, as defined by the IAP/APA  
40  
41 194 evidence-based guidelines on management of acute pancreatitis (11)  
42  
43 195 3. Informed consent for participation  
44  
45  
46

47 196

49 197 The exclusion criteria are:

- 51  
52 198 1. Known etiology  
53  
54 199 2. Chronic pancreatitis, as defined by the M-ANNHEIM criteria (21)  
55  
56 200 3. Recurrent pancreatitis  
57  
58  
59  
60

- 1  
2  
3 201 4. Altered anatomy which prohibits the endosonographer from visualizing the gall bladder, bile  
4  
5 202 ducts, pancreas or pancreatic duct via EUS (e.g. gastric bypass surgery)  
6  
7 203 5. Diagnostic EUS aimed to determine etiology before inclusion  
8  
9

10  
11 204

12  
13 205 Endoscopic ultrasonography

14  
15 206 EUS will be performed in routine clinical practice by an endosonographer. Use of linear or radial EUS  
16  
17 207 will be at the discretion of the endosonographer. All Dutch endosonographers are trained to perform  
18  
19 208 EUS according to the technique of Hawes and Fockens (22).  
20  
21  
22

23 209 The endosonographer will systematically report, using a standardized Case Report Form (CRF),  
24  
25 210 the experience of the endosonographer, visualization of anatomical structures (i.e. gall bladder,  
26  
27 211 common bile duct and pancreatic duct), presence of local complications of acute pancreatitis,  
28  
29 212 characteristics of biliary etiology (i.e. gallstones, microlithiasis and/or biliary sludge), characteristics of  
30  
31 213 chronic pancreatitis, presence of (a) pancreatic or peri-ampullary benign or malignant tumor(s),  
32  
33 214 characteristics of auto-immune pancreatitis, anatomic variations (e.g. pancreas divisum) or other  
34  
35 215 anomalies (e.g. cholecystitis, vascular, renal, splenic or hepatic anomalies or ascites), and performance  
36  
37 216 of fine needle aspiration or fine needle biopsy. Additionally, the type of endoscope, use of sedation,  
38  
39 217 procedure related complications and results of the fine needle aspiration or biopsy will be  
40  
41 218 systematically recorded by the study coordinator in a separate CRF.  
42  
43  
44  
45

46 219

47  
48  
49 220 Primary outcome measure

50  
51 221 The primary outcome measure is the number and ratio of patients with presumed IAP in whom EUS  
52  
53 222 detects a cause for the pancreatitis episode.  
54  
55

56 223 A positive EUS is defined as an EUS during which a definitive cause for the acute pancreatitis  
57  
58 224 episode has been found; or during which abnormalities are visualized constituting a definitive cause,  
59  
60

225 after obtaining tissue and pathological examination. An overview of the exact findings scored as  
226 positive imaging is provided in table 3.

227 If during EUS pancreatic abnormalities are found, yet not enough to make a certain diagnosis  
228 of chronic pancreatitis according to the M-ANNHEIM classification (21), this imaging is considered to  
229 be negative, even though it did show abnormalities. This approach is chosen because the aim of this  
230 study is to determine the rate of which EUS can find a cause for the presumed IAP episode. For the  
231 same reason, report of an anatomical abnormality during EUS after a first episode of acute pancreatitis  
232 is not scored as positive imaging as pancreatic morphological changes are very common in IAP and not  
233 necessarily clinically relevant, as is elaborated on in the discussion (23).

234

#### 235 Secondary outcome measures

236 The secondary outcome measures are recurrence rate of acute pancreatitis, severity of recurrent  
237 pancreatitis (20), readmission, performance of additional invasive procedures (e.g. cholecystectomy,  
238 endoscopic sphincterotomy), complications of EUS and of additional interventions, according to the  
239 Clavien-Dindo classification (24), length of hospital stay, quality of life, mortality and costs. Relevant  
240 definitions are reported in Additional File 2.

241

#### 242 Sample size calculation

243 The sample size calculation was based on the primary outcome measure, diagnostic yield of EUS. Based  
244 on two previous studies reporting yield in patients with a first episode of presumed IAP (25, 26),  
245 adjusted for the PICUS study criteria for inclusion (i.e. requiring negative imaging after clinical  
246 recovery) and for positive imaging (i.e. excluding pancreas divisum as etiology), diagnostic yield was  
247 assumed to be 30%. Using a two-sided significance level ( $\alpha$ ) of 0.05, a power ( $1 - \beta$ ) of 80%, 95 patients  
248 are needed to attain a 95% confidence interval (CI) with a range smaller than 10% above and below

1  
2  
3 249 the assumed yield of 30% (95% CI: 20.8, 39.2). Assuming a drop-out rate of 10%, a total of 106 patients  
4  
5 250 will be included (27). The sample size was calculated using the software programs RStudio (28) and  
6  
7 251 nQuery (29).  
8  
9

10  
11 252

### 12 13 253 Follow-up

14  
15  
16 254 Data from patient records on primary and secondary outcome measures will be collected until 1 year  
17  
18 255 after inclusion. Outpatient care and follow-up after the EUS is at the discretion of the treating  
19  
20 256 physician, but an outpatient clinic visit after EUS to discuss the results of the EUS and potential  
21  
22 257 subsequent appropriate treatment can be considered standard care.  
23  
24

25  
26 258 In case of biliary disease, the patient will be considered for endoscopic retrograde  
27  
28 259 cholangiopancreatography (ERCP) with sphincterotomy when choledocho(-micro-)lithiasis or sludge  
29  
30 260 in the common bile duct is present, and cholecystectomy, as is standard care for biliary pancreatitis. A  
31  
32 261 (secretin-enhanced) MRCP will be recommended, if not performed earlier, if a patient is readmitted  
33  
34 262 for a recurrent episode of acute pancreatitis after a negative EUS for etiology, in order to rule out  
35  
36 263 structural anomalies such as pancreas divisum. This is in accordance with current guidelines (11).  
37  
38

39  
40 264 Patients will be asked to fill out the Short Form-36 questionnaire in the validated Dutch  
41  
42 265 translation on day 3 after inclusion, after 6 months and after 1 year. This questionnaire in both English  
43  
44 266 and Dutch is included in additional file 3.  
45  
46

47 267

### 48 49 50 268 Statistical aspects

51  
52 269 All included subjects will be evaluated for primary and secondary endpoints until 1 year after inclusion.  
53  
54 270 The primary analysis will be based on intention-to-treat principles. For exploratory reasons a per-  
55  
56 271 protocol analysis will be performed too.  
57  
58  
59  
60



1  
2  
3 272 The intention-to-treat population comprises all patients included in the study, regardless of  
4  
5 273 adherence to study protocol. The per-protocol population is the subset of included patients who were  
6  
7 274 treated with the guidelines of the protocol (i.e. meeting all eligibility criteria including all of the  
8  
9  
10 275 diagnostic tests required for the diagnosis of IAP, undergoing EUS as described in the “Endoscopic  
11  
12 276 ultrasonography section”). A tabular listing of all patients excluded from the intention-to-treat  
13  
14 277 population will be provided together with the reasons for exclusion.  
15  
16

17 278 All analyses will be performed in SPSS for Microsoft Windows. All data handling and analysis  
18  
19 279 will be saved in a syntax-file. Results will be presented with all centers combined. A two-tailed p-value  
20  
21  
22 280 of < 0.05 is considered statistically significant.  
23  
24

25 281

26  
27  
28 282 ***Baseline variables***

29  
30 283 The reported baseline characteristics consist of age, sex, body mass index (BMI), previous  
31  
32 284 cholecystectomy, nicotine and alcohol use, severity of pancreatitis, length of hospital stay, amylase,  
33  
34 285 lipase, C-reactive protein, alanine transaminase, calcium, albumin and triglycerides levels in blood  
35  
36 286 serum on admission, imaging modalities before EUS and their findings. Baseline characteristics of EUS  
37  
38  
39 287 will include timing of EUS, experience of endosonographer and type of sedation and type of endoscope  
40  
41 288 used. Data will be presented in percentages or as mean with standard deviation, or in case of a skewed  
42  
43 289 distribution as median with interquartile range (IQR).  
44  
45

46 290

47  
48  
49  
50 291 ***Primary outcome measure: etiology detection rate***

51  
52 292 Overall detection rate of an etiology for the episode of acute pancreatitis will be presented as  
53  
54 293 percentage with a 95% CI. Predefined subgroup analyses will be made for patients with and without  
55  
56 294 obesity (cut-off at a BMI of 30), a previous cholecystectomy, alcohol use and local complications from  
57  
58 295 the IAP episode. A subgroup analysis will also be made for patients with a transabdominal ultrasound  
59  
60

1  
2  
3 296 as imaging after clinical recovery and with magnetic resonance imaging (MRI) or MRCP as imaging after  
4  
5 297 clinical recovery. Finally, a subgroup analysis will be made for EUS performed by endosonographers  
6  
7 298 with and without extensive experience (cut-off at 400 endosonographies performed), use of linear or  
8  
9  
10 299 radial scope and type of sedation used. In subgroup analyses, the Chi-square test or the Fisher's exact  
11  
12 300 test will be used, as appropriate, to compare etiology detection rate between subgroups. In subgroup  
13  
14 301 analyses, comparability between groups regarding baseline variables will be checked. If the subgroups  
15  
16 302 differ statistically significantly in one or more baseline variables, this will be corrected in a logistic  
17  
18 303 regression analysis.  
19  
20  
21  
22 304

### 25 305 ***Secondary outcome measures***

26  
27 306 Secondary outcome measures will be described as percentages with 95% CI, as mean with standard  
28  
29 307 deviation or median with IQR, as appropriate.  
30  
31

32  
33 308 For recurrence rate, subgroup analyses will be made for patients with a positive and negative  
34  
35 309 EUS, and in patients with a positive EUS, for patients who were and were not treated adequately. The  
36  
37 310 same subgroup analyses as in the primary outcome measure, will also be applied on the recurrence  
38  
39 311 rate. The Chi-square test or the Fisher's exact test will be used for comparison between subgroups, as  
40  
41 312 appropriate.  
42  
43

44  
45 313 For quality of life, subgroup analyses will be made for baseline versus follow-up quality of life  
46  
47 314 and for patients with a positive and negative EUS, and with and without pancreatitis recurrence during  
48  
49 315 follow-up. The (un-)paired T-test, Wilcoxon signed rank test or the Mann-Whitney U test will be used  
50  
51 316 for comparisons between subgroups, as appropriate.  
52  
53

54 317  
55  
56  
57  
58  
59  
60

1  
2  
3 318 **Cost analysis**  
4

5 319 The cost analysis will comprise direct medical costs, which are generated by healthcare utilization and  
6  
7 320 include hospital admission periods and therapeutic and diagnostic procedures (30). Estimates of unit  
8  
9  
10 321 costs will be based on Dutch reference data from the cost guide of the Dutch Health Council (31). If  
11  
12 322 this guide is an inappropriate determination of unit costs, the costs will be based on data provided by  
13  
14 323 two hospital administrations (one university center and one general hospital) to account for the actual  
15  
16 324 input of personnel, material and overhead over hospital resources used. Cost calculations will be used  
17  
18 325 to determine cost of interventions (surgical, endoscopic or radiological) and diagnostic imaging. The  
19  
20  
21 326 cost analysis will be reported separately from the main study manuscript.  
22  
23

24 327

25  
26  
27 328 **Patient and public involvement**  
28

29 329 The patient advocacy organization '*Alveeskliervereniging Nederland*' was involved in the design of the  
30  
31 330 PICUS study. The experience of the patient advocacy organization with IAP and participation in  
32  
33 331 scientific research has driven the research question and design of the study with regards to patient  
34  
35 332 burden. The patient advocacy organization will also be involved in the dissemination and  
36  
37 333 implementation of the study results.  
38  
39

40  
41 334 All patients eligible for participation will be asked to give written informed consent.  
42  
43

44 335

45  
46  
47 336  
48  
49

50 337 **Ethics and dissemination**  
51

52 338 The PICUS study is conducted according to the principles of the Declaration of Helsinki (October 2013)  
53  
54 339 and to the Guideline for Good Clinical Practice by the International Council for Harmonization  
55  
56  
57 340 (November 9 2016).  
58  
59  
60

1  
2  
3 341 The need for ethical approval was waived by the Medical Ethics Review Committee of the  
4  
5 342 Academic Medical Center on May 28, 2018 (W18\_161 # 18.199), by the Medical Research Ethics  
6  
7 343 Committee of the University Medical Center Utrecht on July 04, 2018 (18-469), by the Research Ethics  
8  
9 344 Committee of Radboud university medical center on July 23, 2018 (2018-4520), by the Medical Ethics  
10  
11 345 Review Committee of the Erasmus Medical Center on July 30, 2018 (MEC-2018-1293) and by the  
12  
13 346 Medical Ethics Review Committee of the Maastricht University Medical Center on September 7, 2018  
14  
15 347 (2018-0685). Before start of inclusion, local board approval will be obtained in all participating centers.  
16  
17  
18

19 348 The results of the PICUS study will be submitted for publication in an international peer-  
20  
21 349 reviewed scientific journal, regardless of study outcomes.  
22  
23  
24  
25 350  
26  
27  
28 351

## 30 352 Discussion

31  
32  
33 353 Previous research has suggested that EUS might be beneficial in the detection of an etiology in  
34  
35 354 presumed IAP. However, data lacks on the efficacy of routine EUS in patients with a first episode of  
36  
37 355 presumed IAP, after repeat imaging after clinical recovery is negative for an etiology. The PICUS study  
38  
39 356 aims to determine whether routine EUS is warranted in a first episode of acute pancreatitis where no  
40  
41 357 cause could be uncovered after complete standard diagnostic work-up.  
42  
43  
44

45 358 Currently, guidelines do not clearly define criteria for biliary origin (11). However, it is generally  
46  
47 359 agreed upon that cholelithiasis, microlithiasis or biliary sludge constitute biliary etiology. Several  
48  
49 360 previous studies have shown an association between elevated ALT levels and acute biliary pancreatitis  
50  
51 361 (32-35), with a positive predictive value of 85% for an ALT > 150 U/L within 48 hours after onset of  
52  
53 362 symptoms (11, 32, 33, 35). Therefore, an elevated blood serum ALT level at admission is considered to  
54  
55 363 entail a high probability of biliary etiology, and pancreatitis with an elevated ALT is treated as being of  
56  
57 364 biliary origin (32-34, 36). However, the majority of current literature on EUS did not exclude patients  
58  
59  
60

1  
2  
3 365 based on ALT level at admission (15, 25, 26, 32, 37-46). As these patients have a higher a priori chance  
4  
5 366 of confirmation of biliary etiology on EUS, the etiology detection rate of EUS might be overestimated  
6  
7 367 in these studies. In PICUS, biliary etiology is defined as either the signs of cholelithiasis, microlithiasis  
8  
9  
10 368 or biliary sludge on transabdominal ultrasonography, or transient elevation of the blood serum ALT  
11  
12 369 level of more than twice the upper limit of normal at admission in the absence of ALT elevating  
13  
14 370 comorbidity. By only including patients with normal or slightly elevated ALT levels at admission, the  
15  
16 371 etiology detection rate as reported in PICUS will reflect the detection rate in patients who are truly  
17  
18 372 considered as having presumed IAP after standard diagnostic work-up.  
19  
20

21 373         Current guidelines advise a repeat transabdominal ultrasound after clinical recovery in the  
22  
23 374 work-up of presumed IAP because the index transabdominal ultrasound is less sensitive during the  
24  
25 375 acute phase of pancreatitis. The subpar visualization of gall bladder, bile ducts and pancreas is often  
26  
27 376 due to excessive amounts of air in the intestines caused by pancreatitis-induced ileus and/or  
28  
29 377 suboptimal cooperation of painful patients (47). After the first episode of acute pancreatitis, repeating  
30  
31 378 a transabdominal ultrasound may be able to detect biliary stones where it could not during index  
32  
33 379 admission (48). Of the current literature on EUS in IAP, however, only a minority of studies included  
34  
35 380 repeat imaging in the diagnostic work-up before EUS (15, 40, 41, 43). Previous research has shown that  
36  
37 381 a repeat transabdominal ultrasound has a diagnostic yield of 20% in patients with a first episode of IAP  
38  
39 382 (49). Omitting repeat imaging from diagnostic work-up before EUS may lead to an overestimation of  
40  
41 383 the diagnostic yield of EUS. In PICUS, all patients are required to undergo imaging after clinical  
42  
43 384 recovery, i.e. transabdominal ultrasound or MRI/MRCP. Computed tomography (CT) is not considered  
44  
45 385 sufficient imaging as biliary disease, the most common underlying etiology in presumed IAP, cannot  
46  
47 386 always be adequately detected using CT.  
48  
49  
50  
51  
52  
53

54 387         It is well documented that the overall diagnostic yield of EUS in patients with recurrent  
55  
56 388 pancreatitis is superior to the diagnostic yield of both secretin-enhanced MRCP (s-MRCP) and non-  
57  
58 389 secretin-enhanced MRCP (18, 44, 46, 50). In the subgroup of patients with a pancreas divisum,  
59  
60

1  
2  
3 390 however, s-MRCP is considered to be superior in diagnostic yield to both EUS and MRCP (18). The role  
4  
5 391 of pancreas divisum in the etiology of pancreatitis is unclear. Epidemiological studies have shown that  
6  
7 392 the prevalence of pancreas divisum in the general population is equal to the prevalence in patients  
8  
9 393 with presumed IAP (23). In patients with a pancreas divisum and acute pancreatitis, potentially other  
10  
11 394 disease modifying factors add to the occurrence of pancreatitis, such as increased sensitivity to toxins  
12  
13 395 or genetic susceptibility. Because of this ambiguity, pancreas divisum in patients with a first episode  
14  
15 396 of acute pancreatitis is mostly left untreated in clinical practice. However, if patients with a pancreas  
16  
17 397 divisum present with multiple episodes of presumed IAP, the divisum is often considered to be related  
18  
19 398 to the pancreatitis and is subsequently treated, often with ERCP with endoscopic sphincterotomy,  
20  
21 399 although evidence supporting this practice is limited (23). Because of both the diagnostic superiority  
22  
23 400 of EUS in recurrent pancreatitis as well as the lack of clinical consequences of (s-)MRCP in patients with  
24  
25 401 a first episode of pancreatitis, EUS is preferred to (s-)MRCP as the first choice for additional diagnostic  
26  
27 402 testing for etiology in patients with presumed IAP (18, 44, 46, 50). Subsequently, current guidelines  
28  
29 403 advise performing MRCP in case of recurrent IAP after EUS fails to determine an etiology (11).  
30  
31 404 Therefore, in PICUS, we have chosen not to systematically include (s-)MRCP in the diagnostic work-up  
32  
33 405 before EUS of first episode IAP.  
34  
35  
36  
37  
38  
39

40 406 Current guidelines advise consideration of EUS after a first or second attack of IAP (11).  
41  
42 407 However, there is a paucity of evidence on the efficacy of EUS in first episode IAP. Three previous  
43  
44 408 studies prospectively reported on EUS in patients with first episode IAP (25, 26, 38). However, in these  
45  
46 409 studies, patients were not excluded based on liver enzymes abnormalities suggestive of biliary disease  
47  
48 410 and no repeat imaging after clinical recovery was performed. PICUS will be the first prospective cohort  
49  
50 411 study in which EUS will be performed in patients with a first episode of IAP after complete standard  
51  
52 412 diagnostic work-up before EUS according to current guidelines (11).  
53  
54  
55

56 413 A diagnostic yield of 10% for any etiology will be considered reasonable to justify incorporating  
57  
58 414 routine EUS after a first episode of presumed IAP. This cut-off value was determined during a  
59  
60

1  
2  
3 415 multidisciplinary meeting of the Dutch Pancreatitis Study Group, which included the principal  
4  
5 416 investigators of several trials being executed by the Dutch Pancreatitis Study Group. Considering the  
6  
7 417 expectation that the majority of uncovered etiologies by EUS will be treatable (e.g. biliary disease) and  
8  
9 418 adequate treatment could prevent pancreatitis recurrence, while in a minority of uncovered etiologies  
10  
11 419 diagnosis before progression of disease might be crucial for prognosis (e.g. malignancy), a positive  
12  
13 420 result in 10% of patients was deemed sufficient to warrant routine EUS after a first episode of  
14  
15 421 presumed IAP.  
16  
17  
18

19 422 In conclusion, the PICUS study is the first prospective cohort study of patients with a single  
20  
21 423 episode of presumed IAP after complete standard diagnostic work-up (including exclusion based on  
22  
23 424 blood serum ALT and imaging after clinical recovery). The results of the PICUS study will establish  
24  
25 425 whether routine EUS should be incorporated in the guidelines for standard diagnostic work-up after a  
26  
27 426 first episode of presumed IAP.  
28  
29  
30

31 427

32 428

### 33 34 35 36 37 429 Acknowledgements

38  
39  
40 430 The authors would like to acknowledge:

- 41  
42  
43 431 1. all of the members of the Dutch Pancreatitis Study Group, for their continuous efforts in  
44  
45 432 recruitment of patients,  
46  
47 433 2. dr. S. van Dieren, for providing her expertise in the calculation of the sample size,  
48  
49 434 3. dr. M. van der Vlugt, MD, PhD, for her willingness to act as independent physician for the PICUS  
50  
51 435 study, and  
52  
53 436 4. the pancreatic disease patient advocacy organization *Alvleeskliervereniging Nederland*, for  
54  
55 437 their effort in representing the perspective of (participating) patients during the study design.  
56  
57  
58

59 438

439 **References**

- 440 1. Nesvaderani M, Eslick GD, Vagg D, Faraj S, Cox MR. Epidemiology, aetiology and outcomes of  
441 acute pancreatitis: A retrospective cohort study. *Int J Surg*. 2015;23(Pt A):68-74.
- 442 2. van Brunschot S, van Grinsven J, van Santvoort HC, Bakker OJ, Besselink MG, Boermeester MA,  
443 et al. Endoscopic or surgical step-up approach for infected necrotising pancreatitis: a multicentre  
444 randomised trial. *The Lancet*. 2018;391(10115):51-8.
- 445 3. Bakker OJ, van Brunschot S, van Santvoort HC, Besselink MG, Bollen TL, Boermeester MA, et  
446 al. Early versus on-demand nasoenteric tube feeding in acute pancreatitis. *N Engl J Med*.  
447 2014;371(21):1983-93.
- 448 4. Besselink MGH, van Santvoort HC, Buskens E, Boermeester MA, van Goor H, Timmerman HM,  
449 et al. Probiotic prophylaxis in predicted severe acute pancreatitis: a randomised, double-blind,  
450 placebo-controlled trial. *The Lancet*. 2008;371(9613):651-9.
- 451 5. Bakker OJ, van Santvoort HC, van Brunschot S, Geskus RB, Besselink MG, Bollen TL, et al.  
452 Endoscopic Transgastric vs Surgical Necrosectomy for Infected Necrotizing Pancreatitis A Randomized  
453 Trial. *JAMA*. 2012;307(10):1053-61.
- 454 6. Van Santvoort HC, Besselink MG, Bakker OJ, Hofker HS, Boermeester MA, de Jong CH, et al. A  
455 Step-up Approach or Open Necrosectomy for Necrotizing Pancreatitis. *N Engl J Med*. 2010;362:1491-  
456 502.
- 457 7. Sadr-Azodi O, Oskarsson V, Discacciati A, Videhult P, Askling J, Ekbom A. Pancreatic Cancer  
458 Following Acute Pancreatitis: A Population-based Matched Cohort Study. *Am J Gastroenterol*.  
459 2018;113(11):1711-9.
- 460 8. Zheng Y, Zhou Z, Li H, Li J, Li A, Ma B, et al. A Multicenter Study on Etiology of Acute Pancreatitis  
461 in Beijing During 5 Years. *Pancreas*. 2015;44(3):409-14.
- 462 9. Zhu Y, Pan X, Zeng H, He W, Xia L, Liu P, et al. A Study on the Etiology, Severity, and Mortality  
463 of 3260 Patients With Acute Pancreatitis According to the Revised Atlanta Classification in Jiangxi,  
464 China Over an 8-Year Period. *Pancreas*. 2017;46(4):504-9.



- 1  
2  
3 465 10. Roberts SE, Morrison-Rees S, John A, Williams JG, Brown TH, Samuel DG. The incidence and  
4  
5 466 aetiology of acute pancreatitis across Europe. *Pancreatology*. 2017;17(2):155-65.  
6  
7 467 11. Working Group IAP/APA Acute Pancreatitis Guidelines. IAP/APA evidence-based guidelines for  
8  
9 468 the management of acute pancreatitis. *Pancreatology*. 2013;13(4 Suppl 2):e1-15.  
10  
11  
12 469 12. UK Working Party on Acute Pancreatitis. UK guidelines for the management of acute  
13  
14 470 pancreatitis. *Gut*. 2005;54 Suppl 3:iii1-9.  
15  
16 471 13. Hallensleben ND, Umans DS, Bouwense SA, Verdonk RC, Romkens TE, Witteman BJ, et al. The  
17  
18 472 diagnostic work-up and outcomes of 'presumed' idiopathic acute pancreatitis: A post-hoc analysis of a  
19  
20 473 multicentre observational cohort. *United European Gastroenterol J*. in press.  
21  
22  
23 474 14. Lee SP, Nicholls JF, Park HZ. Biliary Sludge as a Cause of Acute Pancreatitis. *N Engl J Med*.  
24  
25 475 1992;326:589-93.  
26  
27 476 15. Garg PK, Tandon RK, Madan K. Is biliary microlithiasis a significant cause of idiopathic recurrent  
28  
29 477 acute pancreatitis? A long-term follow-up study. *Clin Gastroenterol Hepatol*. 2007;5(1):75-9.  
30  
31  
32 478 16. Tenner S, Baillie J, DeWitt J, Vege SS, American College of G. American College of  
33  
34 479 Gastroenterology guideline: management of acute pancreatitis. *Am J Gastroenterol*.  
35  
36 480 2013;108(9):1400-15; 16.  
37  
38  
39 481 17. Banks PA, Freeman ML, Practice Parameters Committee of the American College of G. Practice  
40  
41 482 guidelines in acute pancreatitis. *Am J Gastroenterol*. 2006;101(10):2379-400.  
42  
43 483 18. Wan J, Ouyang Y, Yu C, Yang X, Xia L, Lu N. Comparison of EUS with MRCP in idiopathic acute  
44  
45 484 pancreatitis: a systematic review and meta-analysis. *Gastrointest Endosc*. 2018.  
46  
47  
48 485 19. Schünemann H BJ, Guyatt G, Oxman A, editors. GRADE handbook for grading quality of  
49  
50 486 evidence and strength of recommendations. Group TGW, editor2013.  
51  
52 487 20. Banks PA, Bollen TL, Dervenis C, Gooszen HG, Johnson CD, Sarr MG, et al. Classification of acute  
53  
54 488 pancreatitis--2012: revision of the Atlanta classification and definitions by international consensus.  
55  
56 489 *Gut*. 2013;62(1):102-11.  
57  
58  
59  
60

- 1  
2  
3 490 21. Schneider A, Lohr JM, Singer MV. The M-ANNHEIM classification of chronic pancreatitis:  
4  
5 491 introduction of a unifying classification system based on a review of previous classifications of the  
6  
7 492 disease. *J Gastroenterol.* 2007;42(2):101-19.
- 9  
10 493 22. Hawes RH, Fockens P. *Endosonography*. Second edition ed. Philadelphia: Elsevier Inc.; 2011.
- 11  
12 494 23. DiMagno MJ, Wamsteker EJ. Pancreas divisum. *Curr Gastroenterol Rep.* 2011;13(2):150-6.
- 13  
14 495 24. Dindo D, Demartines N, Clavien P-A. Classification of Surgical Complications. *Annals of Surgery.*  
15  
16 496 2004;240(2):205-13.
- 17  
18 497 25. Yusoff IF, Raymond G, Sahai AV. A prospective comparison of the yield of EUS in primary vs.  
19  
20 498 recurrent idiopathic acute pancreatitis. *Gastrointest Endosc.* 2004;60(5):673-8.
- 21  
22 499 26. Vila JJ, Vicuna M, Irisarri R, de la Higuera BG, Ruiz-Clavijo D, Rodriguez-Gutierrez C, et al.  
23  
24 500 Diagnostic yield and reliability of endoscopic ultrasonography in patients with idiopathic acute  
25  
26 501 pancreatitis. *Scand J Gastroenterol.* 2010;45(3):375-81.
- 27  
28 502 27. Whitley E, Ball J. Statistics review 4: Sample size calculations. *Critical Care* 2002;6(4):335-41.
- 29  
30 503 28. R-Core-Team. *R: A Language and Environment for Statistical Computing*. Vienna, Austria: The  
31  
32 504 R Foundation for Statistical Computing; 2017.
- 33  
34 505 29. Oliver MR, Yeghiazarian K, Zheng M, Jamshidian M, Koyfman I. *nQuery Advisor*. 1995-2007.
- 35  
36 506 30. Gold MR, Siegel JE, Russel LB. *Cost-effectiveness in Health and Medicine*. New York: Oxford  
37  
38 507 University Press; 1996.
- 39  
40 508 31. Zorginstituut Nederland (Health Institute Netherlands). *Kostenhandleiding: Methodologie van*  
41  
42 509 *kostenonderzoek en referentieprijzen voor economische evaluaties in de gezondheidszorg (Cost*  
43  
44 510 *Guide: Methology of cost analysis and reference prices for economical evaluations in health care)*  
45  
46 511 2015.
- 47  
48 512 32. Liu CL, Fan ST, Lo CM, Tso WK, Wong Y, Poon RT, et al. Clinico-biochemical prediction of biliary  
49  
50 513 cause of acute pancreatitis in the era of endoscopic ultrasonography. *Aliment Pharmacol Ther.*  
51  
52 514 2005;22(5):423-31.
- 53  
54  
55  
56  
57  
58  
59  
60

- 1  
2  
3 515 33. Moolla Z, Anderson F, Thomson SR. Use of amylase and alanine transaminase to predict acute  
4  
5 516 gallstone pancreatitis in a population with high HIV prevalence. *World J Surg.* 2013;37(1):156-61.  
6  
7 517 34. Ammori BJ, Boreham B, Lewis P, Roberts SA. The Biochemical Detection of Biliary Etiology of  
8  
9 518 Acute Pancreatitis on Admission: A Revisit in the Modern Era of Biliary Imaging. *Pancreas.*  
10  
11 519 2003;26:e32-5.  
12  
13  
14 520 35. Tenner SD, H.; Steinberg, W. Predicting gallstone pancreatitis with laboratory parameters: a  
15  
16 521 meta-analysis. *Am J Gastroenterol.* 1994;89:1863-6.  
17  
18  
19 522 36. Schepers NJ, Bakker OJ, Besselink MG, Bollen TL, Dijkgraaf MG, van Eijck CH, et al. Early biliary  
20  
21 523 decompression versus conservative treatment in acute biliary pancreatitis (APEC trial): study protocol  
22  
23 524 for a randomized controlled trial. *Trials.* 2016;17:5.  
24  
25  
26 525 37. Frossard JL, Sosa-Valencia L, Amouyal G, Marty O, Hadengue A, Amouyal P. Usefulness of  
27  
28 526 Endoscopic Ultrasonography in Patients with "Idiopathic" Acute Pancreatitis. *Am J Med.* 2000;109:196-  
29  
30 527 200.  
31  
32 528 38. Govil A, Agrawal MK, Agrawal D, Udawat H. Role of endoscopic ultrasonography in patients  
33  
34 529 with first episode of idiopathic acute pancreatitis. *Indian J Gastroenterol.* 2014;33(3):241-8.  
35  
36  
37 530 39. Mariani A, Arcidiacono PG, Curioni S, Giussani A, Testoni PA. Diagnostic yield of ERCP and  
38  
39 531 secretin-enhanced MRCP and EUS in patients with acute recurrent pancreatitis of unknown aetiology.  
40  
41 532 *Dig Liver Dis.* 2009;41(10):753-8.  
42  
43  
44 533 40. Morris-Stiff G, Al-Allak A, Frost B, Lewis WG, Puntis MC, Roberts A. Does Endoscopic Ultrasound  
45  
46 534 Have Anything to Offer in the Diagnosis of Idiopathic Acute Pancreatitis? *JOP.* 2009;10(2):143-6.  
47  
48 535 41. Norton SA, Alderson D. Endoscopic ultrasonography in the evaluation of idiopathic acute  
49  
50 536 pancreatitis *British Journal of Surgery.* 2000;97:1650-5.  
51  
52  
53 537 42. Queneau P-E, Zeeh S, Lapeyre V, Thibault P, Heyd B, Carayon P, et al. Feasibility of and Interest  
54  
55 538 in Combined Endoscopic Ultrasonography and Biliary Drainage in Unexplained Acute Biliopancreatic  
56  
57 539 Disorders. *Dig Dis Sci.* 2002;47(9):2020-4.  
58  
59  
60

- 1  
2  
3 540 43. Rana SS, Bhasin DK, Rao C, Singh K. Role of endoscopic ultrasound in idiopathic acute  
4  
5 541 pancreatitis with negative ultrasound, computed tomography, and magnetic resonance  
6  
7 542 cholangiopancreatography. *Ann Gastroenterol*. 2012;25(2):133-7.  
8  
9  
10 543 44. Repiso Ortega A, Gómez-Rodríguez R, Romero M, Fernández-Zapardiel S, del Mar Céspedes M,  
11  
12 544 Carrobles J-M. Prospective Comparison of Endoscopic Ultrasonography and Magnetic Resonance  
13  
14 545 Cholangiopancreatography in the Etiological Diagnosis of “Idiopathic” Acute Pancreatitis. *Pancreas*.  
15  
16 546 2011;40:289-94.  
17  
18  
19 547 45. Tandon M, Topazian M. Endoscopic Ultrasound in Idiopathic Acute Pancreatitis. *Am J*  
20  
21 548 *Gastroenterol*. 2001;96(3):705–9.  
22  
23  
24 549 46. Thevenot A, Bournet B, Otal P, Canevet G, Moreau J, Buscail L. Endoscopic ultrasound and  
25  
26 550 magnetic resonance cholangiopancreatography in patients with idiopathic acute pancreatitis. *Dig Dis*  
27  
28 551 *Sci*. 2013;58(8):2361-8.  
29  
30 552 47. Lara LF, Levy MJ. Idiopathic Recurrent Acute Pancreatitis. *MedGenMed*. 2004;6(4):10.  
31  
32  
33 553 48. Signoretti M, Baccini F, Piciucchi M, Iannicelli E, Valente R, Zerboni G, et al. Repeated  
34  
35 554 Transabdominal Ultrasonography Is a Simple and Accurate Strategy to Diagnose a Biliary Etiology of  
36  
37 555 Acute Pancreatitis. *Pancreas*. 2014;43(7):1106-10.  
38  
39 556 49. Hallensleben ND, Umans DS, Bouwense S, Verdonk RC, Besselink MG, Van Hooft JE, et al. The  
40  
41 557 clinical course and diagnostic work-up of idiopathic acute pancreatitis, a post-hoc analysis of a  
42  
43 558 prospective multicenter observational cohort. *Digestive Disease Week; San Diego: Gastroenterology;*  
44  
45 559 2019. p. S-121.  
46  
47  
48 560 50. Meeralam Y, Al-Shammari K, Yaghoobi M. Diagnostic accuracy of EUS compared with MRCP in  
49  
50 561 detecting choledocholithiasis: a meta-analysis of diagnostic test accuracy in head-to-head studies.  
51  
52 562 *Gastrointest Endosc*. 2017;86(6):986-93.  
53  
54  
55 563 51. Stolle M, Sack PM, Thomasius R. Binge drinking in childhood and adolescence: epidemiology,  
56  
57 564 consequences, and interventions. *Dtsch Arztebl Int*. 2009;106(19):323-8.  
58  
59  
60

- 1  
2  
3 565 52. Sadr Azodi O, Orsini N, Andren-Sandberg A, Wolk A. Effect of type of alcoholic beverage in  
4  
5 566 causing acute pancreatitis. *Br J Surg*. 2011;98(11):1609-16.  
6  
7 567 53. Midanik LT. Drunkenness, feeling the effects and 5+ measures. *Addiction*. 1999;94(6):887- 97.  
8  
9 568 54. Ratjen F, Döring G. Cystic fibrosis. *The Lancet*. 2003;361(9358):681-9.  
10  
11 569 55. Spanier B, Bruno MJ, Dijkgraaf MG. Incidence and mortality of acute and chronic pancreatitis  
12  
13 570 in the Netherlands: a nationwide record-linked cohort study for the years 1995-2005. *World J*  
14  
15 571 *Gastroenterol*. 2013;19(20):3018-26.  
16  
17 572 56. CBS StatLine. Households; size, position in household, January 1st 1995-2013 StatLine: Central  
18  
19 573 Bureau for Statistics 2015 [Available from:  
20  
21 574 [http://statline.cbs.nl/Statweb/publication/?VW=T&DM=SLNL&PA=37312&D1=a&D2=0,5,10,\(I-2\)-](http://statline.cbs.nl/Statweb/publication/?VW=T&DM=SLNL&PA=37312&D1=a&D2=0,5,10,(I-2)-&HD=180221-1109&HDR=G1&STB=T)  
22  
23 575 [I&HD=180221-1109&HDR=G1&STB=T](http://statline.cbs.nl/Statweb/publication/?VW=T&DM=SLNL&PA=37312&D1=a&D2=0,5,10,(I-2)-&HD=180221-1109&HDR=G1&STB=T).  
24  
25 576 57. Whitcomb DC. Genetic aspects of pancreatitis. *Annu Rev Med*. 2010;61:413-24.  
26  
27 577 58. Whitcomb DC. Hereditary diseases of the pancreas. In: Yamada T AD, Kaplowitz N, Laine L,  
28  
29 578 Owyang C, Powell DW, editors, editor. *Textbook of Gastroenterology*. 4th ed. Philadelphia: Lippincott  
30  
31 579 Williams & Wilkins; 2003. p. 2147–65.  
32  
33 580 59. Shane E, Dinaz I. Hypercalcemia: Pathogenesis, clinical manifestations, differential diagnosis  
34  
35 581 and management. In: Favus M, editor. *Primer on the metabolic bone diseases and disorders of mineral*  
36  
37 582 *metabolism*. 6th ed. Philadelphia: Kippincott, Williams, and Wilkins; 2006. p. 26-176.  
38  
39 583 60. Berglund L, Brunzell JD, Goldberg AC, Goldberg IJ, Sacks F, Murad MH, et al. Evaluation and  
40  
41 584 treatment of hypertriglyceridemia: an Endocrine Society clinical practice guideline. *J Clin Endocrinol*  
42  
43 585 *Metab*. 2012;97(9):2969-89.  
44  
45 586 61. Nitsche C, Maertin S, Scheiber J, Ritter CA, Lerch MM, Mayerle J. Drug-induced pancreatitis.  
46  
47 587 *Curr Gastroenterol Rep*. 2012;14(2):131-8.  
48  
49 588 62. Lankisch PG, Apte M, Banks PA. Acute pancreatitis. *The Lancet*. 2015;386(9988):85-96.  
50  
51 589 63. Tummala P, Tariq SH, Chibnall JT, Agarwal B. Clinical Predictors of Pancreatic Carcinoma  
52  
53 590 Causing Acute Pancreatitis. *Pancreas*. 2013;42(1):108-13.  
54  
55  
56  
57  
58  
59  
60

- 1  
2  
3 591 64. Cotton PB, Lehman G, Vennes J, Geenen JE, Russell RCG, Meyers WC, et al. Endoscopic  
4  
5 592 sphincterotomy complications and their management: an attempt at consensus. *Gastrointest Endosc.*  
6  
7 593 1991;37:383-93.
- 8  
9  
10 594 65. Connor S. Defining post-operative pancreatitis as a new pancreatic specific complication  
11  
12 595 following pancreatic resection. *HPB (Oxford)*. 2016;18(8):642-51.
- 13  
14 596 66. Booth F, Flint L. Pancreatoduodenal trauma. In: ed BJ, editor. *Blunt multiple trauma*. New York:  
15  
16 597 Marcel Dekker; 1990. p. 497-509.
- 17  
18 598 67. Smith I, Monkemuller K, Wilcox CM. Incidentally Identified Common Bile Duct Dilatation. A  
19  
20 599 Systematic Review of Evaluation, Causes, and Outcome. *J Clin Gastroenterol*. 2015;49:810-5.
- 21  
22  
23 600 68. Mortelé KJ, Rocha TC, Streeter JL, Taylor AJ. Multimodality Imaging of Pancreatic and Biliary  
24  
25 601 Congenital Anomalies. *Radiographics*. 2006;26(3):715-31.

602

603

## 604 Author Statement

### 605 Authors' contributions

606 DSU drafted the manuscript. HCT, RCV, SAB, MGB and JEvH co-authored the writing of the manuscript.  
607 DSU, RCV, SAB, MABo, MJB, PF, EJMvG, JWP, HCvS, FPV, MGB and JEvH were involved in the design of  
608 the study during several meetings of the Dutch Pancreatitis Study Group. NDHL, MPGFA, AB, RAB,  
609 MABr, LH, WLC, HMvD, BCvE, GWE, WLH, CVH, AI, LMK, SDK, LEP, RQ, TEHR, ACITLT, AYT, NGV, AMCJV,  
610 RLJvW and BJW critically assessed the study design, during several meetings, and edited the  
611 manuscript. All authors read and approved the final manuscript.

612

1  
2  
3 613 Funding statement  
4

5 614 This work was supported by the Dutch Digestive Disease Foundation (*Maag Lever Darm Stichting*, grant  
6  
7 615 number D17-25). The PICUS study is an investigator-initiated study. The sponsor had no influence on  
8  
9 616 design, implementation and conduct of the study, as well as on collection, analysis and interpretation  
10  
11 617 of data, construction of the manuscript and decision to publish.  
12  
13  
14

15 618

16  
17  
18 619 Competing interests statement  
19

20 620 The authors declare that they have no competing interests.  
21  
22

23 621

24  
25  
26 622 Data Availability Statement  
27

28  
29 623 The datasets used and/or analyzed during the current study are available from the corresponding  
30  
31 624 author on reasonable request.  
32  
33

34 625

35  
36  
37 626

38  
39  
40 627 Figure legend  
41

42 628 Figure 1: Overview of screening and study procedures. MRI = magnetic resonance imaging. MRCP =  
43  
44 629 magnetic resonance cholangiopancreatography. CRF = Case Report Form. EUS = endoscopic  
45  
46  
47 630 ultrasonography.  
48  
49

50 631

51  
52 632

53  
54  
55 633  
56  
57  
58  
59  
60

634 Table 1

| <b>Standard diagnostic work-up</b>                                   |                                                                            |
|----------------------------------------------------------------------|----------------------------------------------------------------------------|
| <i>Detailed personal and family history, including questions on:</i> | Alcohol use                                                                |
|                                                                      | Recent ERCP                                                                |
|                                                                      | Recent start or changes in use of drugs associated with acute pancreatitis |
|                                                                      | Recent major abdominal trauma                                              |
|                                                                      | Recent abdominal surgery                                                   |
|                                                                      | Familial and hereditary pancreatitis                                       |
|                                                                      | Cystic fibrosis-related pancreatitis                                       |
| <i>Laboratory tests, including:</i>                                  | Blood serum triglycerides level                                            |
|                                                                      | Blood serum calcium level, corrected for the blood serum albumin level     |
|                                                                      | Blood serum ALT level on admission                                         |
| <i>Imaging:</i>                                                      | Transabdominal ultrasound, MRI or MRCP after clinical recovery             |

635 **Table 1: Standard diagnostic work-up** Standard diagnostic work-up according to the 2013 IAP/APA evidence-based guideline  
 636 on management of acute pancreatitis. A listing of the drugs considered to be associated with acute pancreatitis are listed in  
 637 additional file 1. ERCP = endoscopic retrograde cholangiopancreatography; ALT = alanine aminotransferase; MRI = magnetic  
 638 resonance imaging; MRCP = magnetic resonance cholangiopancreatography.

639

640

641

642

643

644



645 Table 2

| Etiology             | Definition                                                                                                                                                                                                                                                                                                                                                                                                                                                                                                                       |
|----------------------|----------------------------------------------------------------------------------------------------------------------------------------------------------------------------------------------------------------------------------------------------------------------------------------------------------------------------------------------------------------------------------------------------------------------------------------------------------------------------------------------------------------------------------|
| Alcohol              | > 4 units of alcohol in the 24 hours prior to start of abdominal complaints (51-53)                                                                                                                                                                                                                                                                                                                                                                                                                                              |
| Biliary disease      | <ol style="list-style-type: none"> <li data-bbox="485 501 1394 674">1. A transient elevated ALT level of &gt;2 times the upper limit of normal at diagnosis of acute pancreatitis, in the absence of other ALT elevating comorbidity (34), OR</li> <li data-bbox="485 730 1394 763">2. Gallstones, microlithiasis and/or biliary sludge, OR</li> <li data-bbox="485 819 1394 931">3. A dilated CBD of &gt;8 mm in patients &lt;76 years or &gt;10 mm in patients &gt;75 years at diagnosis of acute pancreatitis (36)</li> </ol> |
| Cystic fibrosis      | history of cystic fibrosis in the absence of another origin (54)                                                                                                                                                                                                                                                                                                                                                                                                                                                                 |
| Familial             | two or more direct blood-related family members (parents, children or siblings) who have had an episode of acute pancreatitis (55-57)                                                                                                                                                                                                                                                                                                                                                                                            |
| Hereditary           | mutation in the PRSS1, SPINK1, CFTR, CTSC, CLDN2 or CPA1 gene, or direct family member (parents, children, siblings) with one or more of the above mentioned mutations and at least one direct family member who has (had) acute or chronic pancreatitis (57, 58)                                                                                                                                                                                                                                                                |
| Hypercalcemia        | blood serum calcium level $\geq 12$ mg/dl (3 mmol/l), corrected for serum albumin level, as first measured during admission (59)                                                                                                                                                                                                                                                                                                                                                                                                 |
| Hypertriglyceridemia | blood serum triglyceride level of $\geq 1000$ mg/dl (11.2 mmol/l) under fasting conditions, as first measured during admission (60)                                                                                                                                                                                                                                                                                                                                                                                              |
| Medication           | use of drug(s) listed in additional file 1, which has or have been started or increased in dosage within a reasonable temporal sequence, in principle 1                                                                                                                                                                                                                                                                                                                                                                          |

|          |                                                                                                                                              |
|----------|----------------------------------------------------------------------------------------------------------------------------------------------|
|          | month before onset of pancreatitis, and has or have a positive dechallenge (a drug reaction that is confirmed by stopping the drug) (61, 62) |
| Neoplasm | Known hepatopancreatobiliary malignancy or known malignancy with metastases causing obstruction of the pancreatic duct (63)                  |
| ERCP     | ERCP within 24 hours before diagnosis of pancreatitis (64)                                                                                   |
| Surgical | abdominal surgery within 24 hours prior to diagnosis of pancreatitis (65)                                                                    |
| Trauma   | typical blunt trauma to the upper abdomen and pancreatic trauma visible on imaging (66)                                                      |

646 **Table 2: potential etiologies and their definitions** Potential etiologies and their definitions. Side branch or mixed type  
647 *intraductal papillary mucinous neoplasms without dilatation of the pancreatic duct and pancreas divisum will not be*  
648 *considered to be a causative factor for the pancreatitis episode. If imaging is not able to discriminate between gall bladder*  
649 *polyps or concrements, lesions smaller than 10 mm will not be considered an exclusion criterion. Lesions above 10 mm,*  
650 *irrespective of whether they are a polyp or a concrement, are an immediate indication for cholecystectomy, and these patients*  
651 *will be excluded from PICUS. ALT = alanine transaminase. CBD = common bile duct. ERCP = endoscopic retrograde*  
652 *cholangiopancreatography.*

653

654

655

656

657

658

659

660 Table 3

|                                 |                                                                                                                                                                                                                                                                                                                                                                                                                                                                                                                                                                                   |
|---------------------------------|-----------------------------------------------------------------------------------------------------------------------------------------------------------------------------------------------------------------------------------------------------------------------------------------------------------------------------------------------------------------------------------------------------------------------------------------------------------------------------------------------------------------------------------------------------------------------------------|
| <i>Biliary<br/>pancreatitis</i> | Presence of biliary stones, microlithiasis, or sludge                                                                                                                                                                                                                                                                                                                                                                                                                                                                                                                             |
|                                 | Widened CBD, >8 mm in patients <76 years, or >10 mm in patients >75 years, in the absence of other CBD dilating factors (e.g. opioid use, distal stenosis, obstruction of external compression of CBD or papilla (67))                                                                                                                                                                                                                                                                                                                                                            |
| <i>Chronic<br/>pancreatitis</i> | Pancreatic calcifications                                                                                                                                                                                                                                                                                                                                                                                                                                                                                                                                                         |
|                                 | > 4 of the following abnormal features of the pancreas: <ol style="list-style-type: none"> <li>1. Enlarged gland size</li> <li>2. Cysts</li> <li>3. Echo-poor lesions (focal areas of reduced echogenicity)</li> <li>4. Echo-rich lesions (&gt; 3 mm in diameter)</li> <li>5. Accentuation of lobular pattern</li> <li>6. Increased duct wall echogenicity</li> <li>7. Irregularity of the main pancreatic duct</li> <li>8. Dilation of the main pancreatic duct &gt; 3.5 mm (68)</li> <li>9. Visible side branches</li> <li>10. Calcifications of the pancreatic duct</li> </ol> |
| <i>Neoplasms</i>                | Definitive diagnosis of pathological tissue after histological or cytological evaluation of specimen of an anomaly observed during EUS, e.g. hyperplastic or malignant tissue, or auto-immune inflammatory disease                                                                                                                                                                                                                                                                                                                                                                |
|                                 | Main duct IPMN or mixed type IPMN causing dilatation of the pancreatic duct                                                                                                                                                                                                                                                                                                                                                                                                                                                                                                       |

661 **Table 3: positive imaging** Definition of positive imaging. For each diagnosis, presence of one of the separately mentioned  
662 abnormalities is required to be considered as positive imaging. Specimen is not required to be obtained during EUS. Anatomical  
663 anomalies (e.g. divisum) are not considered a certain etiology in first episode IAP and therefore not considered as positive  
664 imaging. CBD = common bile duct. EUS = endoscopic ultrasonography. IPMN = intraductal papillary mucinous neoplasm.

665

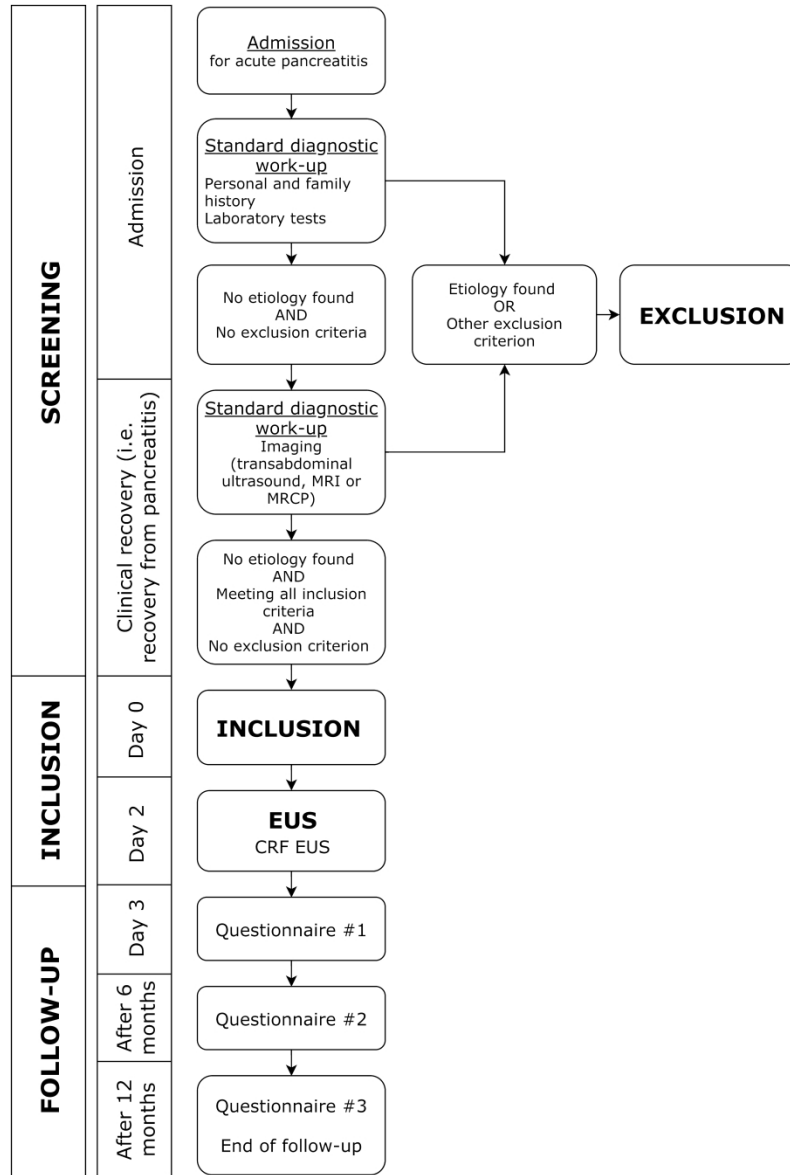

Overview of screening and study procedures. MRI = magnetic resonance imaging. MRCP = magnetic resonance cholangiopancreatography. CRF = Case Report Form. EUS = endoscopic ultrasonography.

105x154mm (1200 x 1200 DPI)

## Additional file 1: Table S1 Drugs associated with acute pancreatitis

| Drugs associated with acute pancreatitis |              |                     |                 |                                |
|------------------------------------------|--------------|---------------------|-----------------|--------------------------------|
| Acetaminophen                            | Cisplatin    | Hydrochlorothiazide | Methyldopa      | Pentavalent antimony compounds |
| Asparaginase                             | Cytarabine   | Interferon alpha    | Metronidazole   |                                |
| Azathioprine                             | Didanosine   | Itraconazole        | Octreotide      | Phenformin                     |
| Bortezomib                               | Enalapril    | Lamivudine          | Olanzapine      | Simvastatin                    |
| Capecitabine                             | Erythromycin | Mercaptopurine      | Opiates         | Steroids                       |
| Carbamazepine                            | Estrogens    | Mesalazine          | Oxyphenbutazone | Sulfasalazine                  |
| Cimetidine                               | Furosemide   | Olsalazine          | Pentamidine     | co-trimoxazole                 |

*Drugs with a definite association with acute pancreatitis (1, 2)*

## References

1. Nitsche C, Maertin S, Scheiber J, Ritter CA, Lerch MM, Mayerle J. Drug-induced pancreatitis. *Curr Gastroenterol Rep.* 2012;14(2):131-8.
2. Lankisch PG, Apte M, Banks PA. Acute pancreatitis. *The Lancet.* 2015;386(9988):85-96.

## 1 Additional file 2: Relevant definitions

2 Acute pancreatitis: an acute inflammation of the pancreatic parenchyma, diagnosed when at least two  
3 of the three following characteristics are present (1):

- 4 1. Clinical features of acute pancreatitis, such as upper abdominal pain
- 5 2. Elevated serum amylase or lipase levels of at least three times the upper limit of normal (ULN)
- 6 3. Signs of acute pancreatitis on imaging

7 Note: no value of the required serum amylase or lipase level is provided as every participating center  
8 has a local laboratory, which is why each center may use different normal range values.

9  
10 Idiopathic acute pancreatitis is considered to be present if no etiology is found in standard work-up,  
11 according to the IAP/APA evidence-based guidelines on management of acute pancreatitis (2), which  
12 comprises at least the following tests:

- 13 1. A detailed personal and family history, including questions on:
  - 14 a. Alcohol use
  - 15 b. Recent endoscopic retrograde cholangiopancreatography (ERCP)
  - 16 c. Recent start of or changes in use of drugs associated with acute pancreatitis
  - 17 d. Recent major abdominal trauma
  - 18 e. Recent abdominal surgery
  - 19 f. Familial pancreatitis
  - 20 g. Hereditary pancreatitis

- 1  
2  
3 21 h. Cystic fibrosis related pancreatitis  
4  
5  
6 22 2. Laboratory tests, including:  
7  
8  
9 23 a. Blood serum triglycerides level on admission  
10  
11  
12 24 b. Blood serum calcium level, corrected for the serum albumin level, on admission  
13  
14  
15 25 c. Blood serum alanine transaminase (ALT) level on admission  
16  
17  
18 26 3. Imaging via transabdominal ultrasound, magnetic resonance imaging (MRI) or magnetic  
19  
20 27 resonance cholangiopancreatography (MRCP) after clinical recovery  
21  
22

23 28 Note: side branch or mixed type intraductal papillary mucinous neoplasms (IPMN) without dilatation  
24  
25 29 of the pancreatic duct will not be considered to be a causative factor for the pancreatitis episode.  
26  
27

28 30 Note: if the imaging is not able to discriminate between gall bladder polyps or concrements, lesions  
29  
30 31 smaller than 10 mm will not be considered an exclusion criterion. Lesions above 10 mm, irrespective  
31  
32 32 of whether they are a polyp or a concrement, are an immediate indication for cholecystectomy, and  
33  
34 33 will be excluded from PICUS.  
35  
36  
37 34

38  
39  
40 35 Alcoholic pancreatitis: pancreatitis caused by an excess intake of alcohol, diagnosed when biliary  
41  
42 36 etiology is not demonstrated by standard work-up and the patient has indicated (either by direct or  
43  
44 37 indirect personal history or by findings during physical examination) to have drunk at least five units of  
45  
46 38 alcohol in the 24 hours prior to start of abdominal complaints (or in asymptomatic acute pancreatitis:  
47  
48 39 prior to diagnosis) (3-5)  
49  
50  
51  
52 40  
53  
54  
55 41  
56  
57  
58  
59  
60

1  
2  
3 42 Biliary pancreatitis: pancreatitis caused by biliary stones, microlithiasis or sludge, diagnosed when one  
4  
5 43 of the following features is present:

- 6  
7  
8 44 1. A transient elevated ALT level of more than two times the ULN at diagnosis of acute  
9  
10 45 pancreatitis, in the absence of ALT elevating comorbidity (6)
- 11  
12  
13 46 2. Signs of presence of gallstones, microlithiasis or sludge on imaging, defined as follows:
- 14  
15  
16 47 a. Gallstones, microlithiasis and/or biliary sludge, either in the gall bladder, ductus  
17  
18 48 cysticus, intrahepatic bile ducts or in the common bile duct (CBD), and/or
- 19  
20  
21 49 b. A CBD of more than eight mm in patients 75 years old or younger or more than ten  
22  
23 50 mm in patients older than 75 years at diagnosis of acute pancreatitis (7)

24  
25  
26 51 Note: no value of the required serum ALT level is provided as the normal range values depend on the  
27  
28 52 sex of the patient and as every participating center has a local laboratory, which is why each center  
29  
30 53 may use different normal range values.

31  
32  
33  
34 54  
35  
36  
37 55 Chronic pancreatitis: a chronic inflammation of the pancreatic parenchyma, defined as typical clinical  
38  
39 56 history of chronic pancreatitis (such as recurrent pancreatitis or abdominal pain, except for primary  
40  
41 57 painless pancreatitis) and one or more of the following (8):

- 42  
43  
44 58 1. Pancreatic calcifications
- 45  
46  
47 59 2. Moderate or marked ductal lesions, defined as two or more of the following abnormal features  
48  
49 60 on transabdominal ultrasound, computed tomography (CT) or MRI/MRCP, according to the  
50  
51 61 Cambridge classification (9):
- 52  
53  
54 62 a. Main pancreatic duct abnormalities, either enlargement or increased echogenicity of  
55  
56 63 the duct wall (mandatory)
- 57  
58  
59 64 b. Pancreatic enlargement
- 60



1  
2  
3  
4  
5  
6  
7  
8  
9  
10  
11  
12  
13  
14  
15  
16  
17  
18  
19  
20  
21  
22  
23  
24  
25  
26  
27  
28  
29  
30  
31  
32  
33  
34  
35  
36  
37  
38  
39  
40  
41  
42  
43  
44  
45  
46  
47  
48  
49  
50  
51  
52  
53  
54  
55  
56  
57  
58  
59  
60

- 65 c. Cavities
  - 66 d. Duct irregularities including intraductal fillings defects, calculi or duct obstruction
  - 67 e. Focal acute pancreatitis
  - 68 f. Parenchymal heterogeneity
  - 69 g. Irregularities of pancreatic head or body contour
- 70 3. Moderate or marked ductal lesions, defined as five or more of the following abnormal features
- 71 on endoscopic ultrasonography (EUS):
- 72 a. Enlarged gland size
  - 73 b. Cysts
  - 74 c. Echo-poor lesions (focal areas of reduced echogenicity)
  - 75 d. Echo-rich lesions (more than three mm in diameter)
  - 76 e. Accentuation of lobular pattern (e.g., echo-poor normal parenchyma surrounded by
  - 77 hyperechoic strands)
  - 78 f. Increased duct wall echogenicity
  - 79 g. Irregularity of the main pancreatic duct (e.g., with narrowing of the duct)
  - 80 h. Dilation of the main pancreatic duct
  - 81 i. Visible side branches (e.g., with dilation)
  - 82 j. Calcification (of the pancreatic duct)
- 83 4. Marked and persistent exocrine insufficiency defined as pancreatic steatorrhea markedly
- 84 reduced by enzyme supplementation
- 85 5. Typical histology of an adequate histological specimen

1  
2  
3 86 Note: during initial diagnostic work-up during admission 'marked and persistent exocrine insufficiency'  
4  
5 87 cannot be evaluated properly. Therefore this part of the definition of chronic pancreatitis will not be  
6  
7 88 applicable during standard work-up. However, if the patient does show marked and persistent  
8  
9 89 exocrine insufficiency during follow-up (either during the outpatient clinic visit after repeat  
10  
11 90 transabdominal ultrasound or after the EUS), this will be considered to be diagnostic for chronic  
12  
13 91 pancreatitis. The same is applicable for histology of an adequate histological specimen: this is not part  
14  
15 92 of standard work-up, however, if a typical histological specimen is obtained during follow-up, this will  
16  
17 93 be considered to be diagnostic for chronic pancreatitis.  
18  
19  
20  
21  
22 94

23  
24 95 Clinical recovery from acute pancreatitis: resolution of pancreatic inflammation, present when one of  
25  
26 96 the following criteria is met:

- 27  
28  
29 97 1. Discharge from the hospital  
30  
31  
32 98 2. Normal inflammation parameters in laboratory tests  
33  
34  
35 99 3. No signs of pancreatic inflammation on imaging  
36  
37

38 100  
39  
40  
41 101 Cystic fibrosis: an autosomal recessive disorder caused by a mutation in the CFTR gene, resulting in  
42  
43 102 defective chloride channels in epithelial cells, diagnosed by either a concentration in sweat of chloride  
44  
45 103 greater than 60 mmol/L on repeated analysis, confirmation of a CFTR gene mutation, or both (10).  
46  
47

48 104  
49  
50  
51 105 Cystic fibrosis related pancreatitis: pancreatitis caused by defective ductular and acinar pancreatic  
52  
53 106 secretion, diagnosed when a patient with a history of cystic fibrosis presents with an acute pancreatitis  
54  
55 107 in the absence of another origin (10).  
56  
57

58  
59 108  
60

1  
2  
3 109 Familial pancreatitis: acute pancreatitis from any cause that occurs in a family with an incidence that  
4  
5 110 is greater than would be expected by chance alone, given the size of the family and the standardized  
6  
7 111 incidence of pancreatitis within the Dutch population, defined as acute pancreatitis in patients who  
8  
9 112 have two or more direct blood-related family members (parents, children or siblings) who have had an  
10  
11 113 episode of acute pancreatitis (11-13).

14  
15 114

16  
17  
18 115 Fever: a body temperature of 38.5°C or higher.

19  
20  
21 116

22  
23  
24 117 Hereditary pancreatitis: otherwise unexplained pancreatitis in an individual from a family in which the  
25  
26 118 pancreatitis phenotype appears to be inherited through a disease-causing gene mutation expressed in  
27  
28 119 an autosomal dominant pattern, defined as pancreatitis in patients with a known mutation in the  
29  
30 120 PRSS1 gene, the SPINK1 gene, the CFTR gene, the CTSC gene, the CLDN2 gene or the CPA1 gene, or if  
31  
32 121 the patient has a direct family member (parents, children, siblings) with one or more of the above  
33  
34 122 mentioned mutations and has at least one direct family member who has had an episode of acute  
35  
36 123 pancreatitis or has chronic pancreatitis (13, 14).

37  
38  
39  
40 124

41  
42  
43 125 Hypercalcemic pancreatitis: acute pancreatitis caused by hypercalcemia and diagnosed when no signs  
44  
45 126 of a biliary pancreatitis are found in standard work-up and the patient has a blood serum calcium level  
46  
47 127 of at least 12 mg/dl or 3 mmol/l, corrected for the serum albumin level, as first measured during  
48  
49 128 admission (15).

50  
51  
52 129

53  
54  
55 130

1  
2  
3 131 Hypertriglyceridemic pancreatitis: acute pancreatitis based on hypertriglyceridemia and diagnosed if  
4  
5 132 a biliary etiology is not demonstrated by standard work-up and the patient has a blood serum  
6  
7 133 triglyceride level of at least 1000 mg/dl (or 11.2 mmol/l) under fasting conditions, as first measured  
8  
9 134 during admission (16).  
10  
11  
12

13 135

14  
15 136 Hypothermia: a body temperature of 35.9°C or lower.  
16  
17  
18

19 137

20  
21 138 Infected (extra)pancreatic necrosis: presence of microorganisms in (extra-)pancreatic necrosis,  
22  
23 139 confirmed by a positive culture obtained by means of fine needle aspiration or from the first drainage  
24  
25 140 procedure or necrosectomy, the presence of gas in the (extra-)pancreatic collection on CT, or the  
26  
27 141 presence of clinical signs of persistent sepsis or progressive clinical deterioration despite maximal  
28  
29 142 support on the intensive care unit (ICU) without other causes for infection (ruled out should be:  
30  
31 143 pneumonia, urinary tract infection, wound infection, endocarditis, abdominal sepsis or any other  
32  
33 144 infection which could be suspected based on the individual patient's clinical presentation) (17).  
34  
35  
36

37 145

38  
39 146 Medication associated pancreatitis: acute pancreatitis is considered to be caused by drugs when a  
40  
41 147 biliary cause is not demonstrated by standard work-up, the patient uses one or multiple drug(s) listed  
42  
43 148 in table S1 in additional file 1, the drug has been started or increased in dosage within a reasonable  
44  
45 149 temporal sequence, in principle 1 month before the onset of the pancreatitis, and has a positive  
46  
47 150 dechallenge (a drug reaction that is confirmed by stopping the drug) (18, 19).  
48  
49  
50

51 151

52  
53  
54 152 Microlithiasis: stones or concrements, smaller than four mm, in the gall bladder or the bile ducts (20).  
55  
56  
57

58 153

1  
2  
3 154 Murphy's sign: the phenomenon where compression of the right upper quadrant causes the patient  
4  
5 155 to catch their breath due to pain when taking a deep breath (21).  
6  
7

8 156  
9  
10  
11 157 Pancreas divisum: a congenital malformation of the main pancreatic duct (Wirsung's duct) with two  
12  
13 158 separate ducts (a separate ventral duct of Wirsung and a dorsal duct of Santorini) as opposed to one  
14  
15 159 main duct (of Wirsung) (22).  
16  
17

18 160  
19  
20  
21 161 Positive imaging: positive imaging is defined as imaging during which a definitive cause for the acute  
22  
23 162 pancreatitis episode can be found; or during which abnormalities are visualized constituting a  
24  
25 163 definitive cause, after obtaining tissue and pathological examination. So, if during EUS ductal  
26  
27 164 abnormalities are found, yet not enough to make a certain diagnosis of chronic pancreatitis according  
28  
29 165 to the M-ANNHEIM classification (8), this imaging is considered to be negative, even though it did show  
30  
31 166 abnormalities. This approach is chosen because the aim of this study is to determine the rate of which  
32  
33 167 EUS can find a causative factor for a previous acute pancreatitis episode. For the same reason, finding  
34  
35 168 of an anatomical abnormality after a first episode of acute pancreatitis is not scored as positive  
36  
37 169 imaging. An overview of the exact findings scored as positive imaging is provided in table 3 of the main  
38  
39 170 manuscript.  
40  
41  
42  
43  
44

45 171  
46  
47 172 Post-ERCP pancreatitis: pancreatitis caused by mechanical injury from instrumentation and hydrostatic  
48  
49 173 injury from contrast injection during ERCP, diagnosed if a patient develops a pancreatitis within 24  
50  
51 174 hours of an ERCP without indications of another origin (23).  
52  
53  
54

55 175  
56  
57  
58  
59  
60

1  
2  
3 176 Postoperative pancreatitis: pancreatitis caused by perioperative hypoperfusion of the pancreas,  
4  
5 177 diagnosed if a patient develops a pancreatitis within 24 hours of abdominal surgery in the absence of  
6  
7 178 indications for another origin (24).  
8  
9

10 179  
11  
12

13 180 Posttraumatic pancreatitis: pancreatitis caused by pancreatic injury due to trauma to the abdomen,  
14  
15 181 diagnosed when the patient describes a typical blunt trauma to the upper abdomen and pancreatic  
16  
17 182 trauma is visible on imaging (25).  
18  
19

20 183  
21  
22

23 184 Recurrence rate: the risk of a recurrent episode of acute pancreatitis.  
24  
25

26 185  
27  
28

29 186 Sludge: solid material which results from the slow settling of particles dispersed in bile (20).  
30  
31

32 187  
33  
34

35 188  
36  
37

38 189  
39  
40

41 190  
42  
43

44 191  
45  
46

47 192  
48  
49

50 193  
51  
52

53 194  
54  
55

56 195  
57  
58

59 196  
60

1  
2  
3 197 Standard work-up:  
4  
5

6 198 1. A detailed personal and family history, including questions on:  
7

8  
9 199 a. Alcohol use  
10

11  
12 200 b. Recent ERCP  
13

14  
15 201 c. Recent start of or changes in use of drugs associated with acute pancreatitis  
16

17  
18 202 d. Recent major abdominal trauma  
19

20  
21 203 e. Recent abdominal surgery  
22

23  
24 204 f. Familial pancreatitis  
25

26  
27 205 g. Hereditary pancreatitis  
28

29  
30 206 h. Cystic fibrosis related pancreatitis  
31

32 207 2. Laboratory tests, including:  
33

34  
35 208 a. Blood serum triglycerides level, first measured during admission  
36

37  
38 209 b. Blood serum calcium level, corrected for the serum albumin level, first measured  
39 during admission  
40 210

41  
42  
43 211 c. Blood serum ALT level on admission  
44

45  
46 212 3. Imaging via transabdominal ultrasound, MRI or MRCP after clinical recovery  
47

48  
49 213  
50

51  
52 214 Biliary events: acute cholecystitis; biliary colic's requiring readmission; biliary pancreatitis; cholangitis;  
53  
54 215 or obstructive choledocholithiasis needing ERCP.  
55

56  
57 216  
58  
59  
60

1  
2  
3 217 Acute cholecystitis: an acute inflammation of the gall bladder, diagnosed when one item in A, B and C

4  
5 218 is present:

6  
7  
8 219 A) Local signs of inflammation

9  
10  
11 220 1. Murphy's' sign, or

12  
13  
14 221 2. Right upper abdominal quadrant mass, pain or tenderness

15  
16  
17 222 B) Systemic signs of inflammation

18  
19  
20 223 1. Fever or hypothermia, or

21  
22  
23 224 2. Elevated C-reactive protein (CRP), or

24  
25  
26 225 3. Elevated white blood cell count

27  
28  
29 226 C) Imaging findings characteristic of acute cholecystitis (26, 27)

30  
31 227 Note: acute cholecystitis and cholangitis (see definition below) are defined according to the Tokyo  
32  
33 228 classification which defines fever as a body temperature of 38°C or higher; however, fever will be  
34  
35 229 defined in this study as hyperthermia of 38.5°C or higher and hypothermia will be added as a systemic  
36  
37 230 sign of inflammation, as this more accurately reflects clinical practice in the Netherlands.

38  
39  
40  
41 231

42  
43  
44 232 Biliary colic: upper abdominal pain (either right upper quadrant or epigastric pain) lasting at least 30

45  
46 233 minutes, often associated with restlessness (28).

47  
48  
49 234

50  
51 235

52  
53 236

54  
55  
56 237

57

58

59

60



1  
2  
3 238 Cholangitis: an inflammation of the bile duct(s), diagnosed when one item in each of the following  
4  
5 239 categories is present:

6  
7  
8 240 1. Systemic inflammation

9  
10  
11 241 a. Fever, hypothermia and/or shaking chills

12  
13  
14 242 b. Laboratory data: evidence of inflammatory response (abnormal white blood cell  
15  
16 243 counts (defined as smaller than 4,000/ $\mu$ l or larger than 10,000/ $\mu$ l), increase of serum  
17  
18 244 CRP levels (defined as 1 mg/dl or higher), and other changes indicating inflammation)

19  
20  
21 245 2. Cholestasis

22  
23  
24 246 a. Jaundice (defined as a total bilirubin of 2 mg/dl or higher)

25  
26  
27 247 b. Laboratory data: abnormal liver function tests (increased serum alkaline phosphatase,  
28  
29 248 gamma-glutamyltransferase (gamma-GT), aspartate transaminase (AST) and ALT  
30  
31 249 levels (defined as more than 1.5 times the ULN))

32  
33  
34 250 3. Imaging

35  
36  
37 251 a. Biliary dilatation

38  
39  
40 252 b. Evidence of the etiology on imaging (stricture, stone, stent etc.) (26)

41  
42  
43 253  
44  
45  
46 254 Obstructive choledocholithiasis: presence of gallstones, microlithiasis or biliary sludge in the CBD on  
47  
48 255 imaging, requiring an ERCP, according to the treating physician.

49  
50  
51 256  
52  
53  
54  
55  
56  
57  
58  
59  
60

## 257 References

- 258 1. Banks PA, Bollen TL, Dervenis C, Gooszen HG, Johnson CD, Sarr MG, et al. Classification of acute  
259 pancreatitis--2012: revision of the Atlanta classification and definitions by international consensus. *Gut*.  
260 2013;62(1):102-11.
- 261 2. Working Group IAP/APA Acute Pancreatitis Guidelines. IAP/APA evidence-based guidelines for the  
262 management of acute pancreatitis. *Pancreatology*. 2013;13(4 Suppl 2):e1-15.
- 263 3. Stolle M, Sack PM, Thomasius R. Binge drinking in childhood and adolescence: epidemiology,  
264 consequences, and interventions. *Dtsch Arztebl Int*. 2009;106(19):323-8.
- 265 4. Sadr Azodi O, Orsini N, Andren-Sandberg A, Wolk A. Effect of type of alcoholic beverage in causing  
266 acute pancreatitis. *Br J Surg*. 2011;98(11):1609-16.
- 267 5. Midanik LT. Drunkenness, feeling the effects and 5+ measures. *Addiction*. 1999;94(6):887- 97.
- 268 6. Ammori BJ, Boreham B, Lewis P, Roberts SA. The Biochemical Detection of Biliary Etiology of Acute  
269 Pancreatitis on Admission: A Revisit in the Modern Era of Biliary Imaging. *Pancreas*. 2003;26:e32-5.
- 270 7. Schepers NJ, Bakker OJ, Besselink MG, Bollen TL, Dijkgraaf MG, van Eijck CH, et al. Early biliary  
271 decompression versus conservative treatment in acute biliary pancreatitis (APEC trial): study protocol for a  
272 randomized controlled trial. *Trials*. 2016;17:5.
- 273 8. Schneider A, Lohr JM, Singer MV. The M-ANNHEIM classification of chronic pancreatitis: introduction  
274 of a unifying classification system based on a review of previous classifications of the disease. *J Gastroenterol*.  
275 2007;42(2):101-19.
- 276 9. Sarner M, Cotton PB. Classification of pancreatitis. *Gut*. 1984;25:756-9.
- 277 10. Ratjen F, Döring G. Cystic fibrosis. *The Lancet*. 2003;361(9358):681-9.
- 278 11. Spanier B, Bruno MJ, Dijkgraaf MG. Incidence and mortality of acute and chronic pancreatitis in the  
279 Netherlands: a nationwide record-linked cohort study for the years 1995-2005. *World J Gastroenterol*.  
280 2013;19(20):3018-26.
- 281 12. CBS StatLine. Households; size, position in household, January 1st 1995-2013 StatLine: Central Bureau  
282 for Statistics 2015 [Available from:  
283 [http://statline.cbs.nl/Statweb/publication/?VW=T&DM=SLNL&PA=37312&D1=a&D2=0,5,10,\(1-2\)-](http://statline.cbs.nl/Statweb/publication/?VW=T&DM=SLNL&PA=37312&D1=a&D2=0,5,10,(1-2)-&HD=180221-1109&HDR=G1&STB=T)  
284 [I&HD=180221-1109&HDR=G1&STB=T](http://statline.cbs.nl/Statweb/publication/?VW=T&DM=SLNL&PA=37312&D1=a&D2=0,5,10,(1-2)-&HD=180221-1109&HDR=G1&STB=T).

- 1  
2  
3 285 13. Whitcomb DC. Genetic aspects of pancreatitis. *Annu Rev Med.* 2010;61:413-24.  
4  
5 286 14. Whitcomb DC. Hereditary diseases of the pancreas. In: Yamada T AD, Kaplowitz N, Laine L, Owyang C,  
6  
7 287 Powell DW, editors, editor. *Textbook of Gastroenterology.* 4th ed. Philadelphia: Lippincott Williams & Wilkins;  
8  
9 288 2003. p. 2147–65.  
10  
11 289 15. Shane E, Dinaz I. Hypercalcemia: Pathogenesis, clinical manifestations, differential diagnosis and  
12  
13 290 management. In: Favus M, editor. *Primer on the metabolic bone diseases and disorders of mineral metabolism.*  
14  
15 291 6th ed. Philadelphia: Lippincott, Williams, and Wilkins; 2006. p. 26-176.  
16  
17 292 16. Berglund L, Brunzell JD, Goldberg AC, Goldberg IJ, Sacks F, Murad MH, et al. Evaluation and treatment  
18  
19 293 of hypertriglyceridemia: an Endocrine Society clinical practice guideline. *J Clin Endocrinol Metab.*  
20  
21 294 2012;97(9):2969-89.  
22  
23 295 17. van Brunschot S, van Grinsven J, van Santvoort HC, Bakker OJ, Besselink MG, Boermeester MA, et al.  
24  
25 296 Endoscopic or surgical step-up approach for infected necrotising pancreatitis: a multicentre randomised trial.  
26  
27 297 *The Lancet.* 2018;391(10115):51-8.  
28  
29 298 18. Nitsche C, Maertin S, Scheiber J, Ritter CA, Lerch MM, Mayerle J. Drug-induced pancreatitis. *Curr*  
30  
31 299 *Gastroenterol Rep.* 2012;14(2):131-8.  
32  
33 300 19. Lankisch PG, Apte M, Banks PA. Acute pancreatitis. *The Lancet.* 2015;386(9988):85-96.  
34  
35 301 20. Jungst C, Kullak-Ublick GA, Jungst D. Gallstone disease: Microlithiasis and sludge. *Best Pract Res Clin*  
36  
37 302 *Gastroenterol.* 2006;20(6):1053-62.  
38  
39 303 21. Murphy JB. The diagnosis of gall-stones. *Am Med News.* 1903;82:825.33.  
40  
41 304 22. Cotton P. Congenital anomaly of pancreas divisum as cause of obstructive pain and pancreatitis. *Gut.*  
42  
43 305 1980;21:105-14.  
44  
45 306 23. Cotton PB, Lehman G, Vennes J, Geenen JE, Russell RCG, Meyers WC, et al. Endoscopic sphincterotomy  
46  
47 307 complications and their management: an attempt at consensus. *Gastrointest Endosc.* 1991;37:383-93.  
48  
49 308 24. Connor S. Defining post-operative pancreatitis as a new pancreatic specific complication following  
50  
51 309 pancreatic resection. *HPB (Oxford).* 2016;18(8):642-51.  
52  
53 310 25. Booth F, Flint L. Pancreatoduodenal trauma. In: ed BJ, editor. *Blunt multiple trauma.* New York: Marcel  
54  
55 311 Dekker; 1990. p. 497-509.  
56  
57  
58  
59  
60

- 1  
2  
3 312 26. Miura F, Okamoto K, Takada T, Strasberg SM, Asbun HJ, Pitt HA, et al. Tokyo Guidelines 2018: initial  
4  
5 313 management of acute biliary infection and flowchart for acute cholangitis. J Hepatobiliary Pancreat Sci.  
6  
7 314 2018;25(1):31-40.  
8  
9 315 27. Yokoe M, Takada T, Strasberg SM, Solomkin JS, Mayumi T, Gomi H, et al. TG13 diagnostic criteria and  
10  
11 316 severity grading of acute cholecystitis (with videos). Journal of Hepato-Biliary-Pancreatic Sciences.  
12  
13 317 2013;20(1):35-46.  
14  
15 318 28. French E, Robb W. Biliary and renal colic. Br Med J. 1963:135-8.  
16

17 319  
18  
19  
20  
21  
22  
23  
24  
25  
26  
27  
28  
29  
30  
31  
32  
33  
34  
35  
36  
37  
38  
39  
40  
41  
42  
43  
44  
45  
46  
47  
48  
49  
50  
51  
52  
53  
54  
55  
56  
57  
58  
59  
60

## Additional file 3: Short Form 36 Questionnaire

### English version

1. In general, would you say your health is:
- excellent
  - very good
  - good
  - fair
  - poor
2. **Compared to one year ago**, how would you rate your health in general **now**?
- much better now than one year ago
  - somewhat better now than one year ago
  - about the same
  - somewhat worse now than one year ago
  - much worse now than one year ago

- 1  
2  
3  
4  
5  
6  
7  
8  
9  
10  
11  
12  
13  
14  
15  
16  
17  
18  
19  
20  
21  
22  
23  
24  
25  
26  
27  
28  
29  
30  
31  
32  
33  
34  
35  
36  
37  
38  
39  
40  
41  
42  
43  
44  
45  
46  
47  
48  
49  
50  
51  
52  
53  
54  
55  
56  
57  
58  
59  
60
3. The following items are about activities you might do during a typical day.  
Does **your health now limit you** in these activities? If so, how much?

|                                                                                                            | Yes, limited<br>a lot    | Yes, limited<br>a little | No, not<br>limited at all |
|------------------------------------------------------------------------------------------------------------|--------------------------|--------------------------|---------------------------|
| a. <b>Vigorous activities</b> , such as running, lifting heavy objects, participating in strenuous sports  | <input type="checkbox"/> | <input type="checkbox"/> | <input type="checkbox"/>  |
| b. <b>Moderate activities</b> , such as moving a table, pushing a vacuum cleaner, bowling, or playing golf | <input type="checkbox"/> | <input type="checkbox"/> | <input type="checkbox"/>  |
| c. Lifting or carrying groceries                                                                           | <input type="checkbox"/> | <input type="checkbox"/> | <input type="checkbox"/>  |
| d. Climbing <b>several</b> flights of stairs                                                               | <input type="checkbox"/> | <input type="checkbox"/> | <input type="checkbox"/>  |
| e. Climbing <b>one</b> flight of stairs                                                                    | <input type="checkbox"/> | <input type="checkbox"/> | <input type="checkbox"/>  |
| f. Bending, kneeling, or stooping                                                                          | <input type="checkbox"/> | <input type="checkbox"/> | <input type="checkbox"/>  |
| g. Walking <b>more than a mile</b>                                                                         | <input type="checkbox"/> | <input type="checkbox"/> | <input type="checkbox"/>  |
| h. Walking <b>several blocks</b>                                                                           | <input type="checkbox"/> | <input type="checkbox"/> | <input type="checkbox"/>  |
| i. Walking <b>one block</b>                                                                                | <input type="checkbox"/> | <input type="checkbox"/> | <input type="checkbox"/>  |
| j. Bathing or dressing yourself                                                                            | <input type="checkbox"/> | <input type="checkbox"/> | <input type="checkbox"/>  |

1  
2  
3  
4 4. During the **past 4 weeks**, have you had any of the following problems with  
5 your work or other regular daily activities **as a result of your physical**  
6 **health**?

- |                                               | Yes                      | No                       |
|-----------------------------------------------|--------------------------|--------------------------|
| 7                                             |                          |                          |
| 8                                             |                          |                          |
| 9                                             |                          |                          |
| 10                                            |                          |                          |
| 11                                            |                          |                          |
| 12 a. Cut down the <b>amount of time</b> you  | <input type="checkbox"/> | <input type="checkbox"/> |
| 13 spent on work or other activities          |                          |                          |
| 14                                            |                          |                          |
| 15 b. <b>Accomplished less</b> than you       | <input type="checkbox"/> | <input type="checkbox"/> |
| 16 would like                                 |                          |                          |
| 17                                            |                          |                          |
| 18                                            |                          |                          |
| 19 c. Were limited in the <b>kind</b> of work | <input type="checkbox"/> | <input type="checkbox"/> |
| 20 or other activities                        |                          |                          |
| 21                                            |                          |                          |
| 22                                            |                          |                          |
| 23 d. Had <b>difficulty</b> performing the    | <input type="checkbox"/> | <input type="checkbox"/> |
| 24 work or other activities (for              |                          |                          |
| 25 example, it took extra effort)             |                          |                          |
| 26                                            |                          |                          |
| 27                                            |                          |                          |
| 28                                            |                          |                          |
| 29                                            |                          |                          |
| 30                                            |                          |                          |
| 31                                            |                          |                          |

32 5. During the **past 4 weeks**, have you had any of the following problems with  
33 your work or other regular daily activities **as a result of any emotional**  
34 **problems** (such as feeling depressed or anxious)?

- |                                              | Yes                      | No                       |
|----------------------------------------------|--------------------------|--------------------------|
| 35                                           |                          |                          |
| 36                                           |                          |                          |
| 37                                           |                          |                          |
| 38                                           |                          |                          |
| 39                                           |                          |                          |
| 40 a. Cut down the <b>amount of time</b> you | <input type="checkbox"/> | <input type="checkbox"/> |
| 41 spent on work or other activities         |                          |                          |
| 42                                           |                          |                          |
| 43                                           |                          |                          |
| 44 b. <b>Accomplished less</b> than you      | <input type="checkbox"/> | <input type="checkbox"/> |
| 45 would like                                |                          |                          |
| 46                                           |                          |                          |
| 47                                           |                          |                          |
| 48 c. Didn't do work or other activities     | <input type="checkbox"/> | <input type="checkbox"/> |
| 49 as <b>carefully</b> as usual              |                          |                          |
| 50                                           |                          |                          |
| 51                                           |                          |                          |
| 52                                           |                          |                          |
| 53                                           |                          |                          |
| 54                                           |                          |                          |
| 55                                           |                          |                          |
| 56                                           |                          |                          |
| 57                                           |                          |                          |
| 58                                           |                          |                          |
| 59                                           |                          |                          |
| 60                                           |                          |                          |

- 1  
2  
3  
4  
5  
6  
7  
8  
9  
10  
11  
12  
13  
14  
15  
16  
17  
18  
19  
20  
21  
22  
23  
24  
25  
26  
27  
28  
29  
30  
31  
32  
33  
34  
35
6. During the **past 4 weeks**, to what extent has your physical health or emotional problems interfered with your normal social activities with family, friends, neighbors, or groups?
- not at all  
 slightly  
 moderately  
 quite a bit  
 extremely

- 36  
37  
38  
39  
40  
41  
42  
43  
44  
45  
46  
47  
48  
49  
50  
51  
52  
53  
54  
55  
56  
57  
58  
59  
60
7. How much **bodily** pain have you had during the **past 4 weeks**?
- none  
 very mild  
 mild  
 moderate  
 severe  
 very severe

8. During the **past 4 weeks**, how much did **pain** interfere with your normal work (including both work outside the home and housework)?
- not at all  
 a little bit  
 moderately  
 quite a bit  
 extremely



9. These questions are about how you feel and how things have been with you **during the past 4 weeks**. For each question, please give the one answer that comes closest to the way you have been feeling.

| How much of the time during the <b>past 4 weeks</b> ...                | <b>All of the time</b>   | <b>Most of the time</b>  | <b>A good bit of the time</b> | <b>Some of the time</b>  | <b>A little of the time</b> | <b>None of the time</b>  |
|------------------------------------------------------------------------|--------------------------|--------------------------|-------------------------------|--------------------------|-----------------------------|--------------------------|
| a. Did you feel full of pep?                                           | <input type="checkbox"/> | <input type="checkbox"/> | <input type="checkbox"/>      | <input type="checkbox"/> | <input type="checkbox"/>    | <input type="checkbox"/> |
| b. Have you been a very nervous person?                                | <input type="checkbox"/> | <input type="checkbox"/> | <input type="checkbox"/>      | <input type="checkbox"/> | <input type="checkbox"/>    | <input type="checkbox"/> |
| c. Have you felt so down in the dumps that nothing could cheer you up? | <input type="checkbox"/> | <input type="checkbox"/> | <input type="checkbox"/>      | <input type="checkbox"/> | <input type="checkbox"/>    | <input type="checkbox"/> |
| d. Have you felt calm and peaceful?                                    | <input type="checkbox"/> | <input type="checkbox"/> | <input type="checkbox"/>      | <input type="checkbox"/> | <input type="checkbox"/>    | <input type="checkbox"/> |
| e. Did you have a lot of energy?                                       | <input type="checkbox"/> | <input type="checkbox"/> | <input type="checkbox"/>      | <input type="checkbox"/> | <input type="checkbox"/>    | <input type="checkbox"/> |
| f. Have you felt downhearted and blue?                                 | <input type="checkbox"/> | <input type="checkbox"/> | <input type="checkbox"/>      | <input type="checkbox"/> | <input type="checkbox"/>    | <input type="checkbox"/> |
| g. Did you feel worn out?                                              | <input type="checkbox"/> | <input type="checkbox"/> | <input type="checkbox"/>      | <input type="checkbox"/> | <input type="checkbox"/>    | <input type="checkbox"/> |
| h. Have you been a happy person?                                       | <input type="checkbox"/> | <input type="checkbox"/> | <input type="checkbox"/>      | <input type="checkbox"/> | <input type="checkbox"/>    | <input type="checkbox"/> |
| i. Did you feel tired?                                                 | <input type="checkbox"/> | <input type="checkbox"/> | <input type="checkbox"/>      | <input type="checkbox"/> | <input type="checkbox"/>    | <input type="checkbox"/> |

- 1  
2  
3  
4  
5  
6  
7  
8  
9  
10  
11  
12  
13  
14  
15  
16  
17  
18
10. During the **past 4 weeks**, how much of the time has **your physical health or emotional problems** interfered with your social activities (like visiting with friends, relatives, etc.)?
- all of the time  
 most of the time  
 some of the time  
 a little of the time  
 none of the time

19  
20  
21  
22  
23  
24  
25  
26  
27  
28  
29  
30  
31  
32  
33  
34  
35  
36  
37  
38  
39  
40  
41  
42  
43  
44  
45  
46  
47  
48  
49  
50

11. How TRUE or FALSE is **each** of the following statements for you?

- |                                                          | <b>Definitely true</b>   | <b>Mostly true</b>       | <b>Don't know</b>                   | <b>Mostly false</b>      | <b>Definitely false</b>  |
|----------------------------------------------------------|--------------------------|--------------------------|-------------------------------------|--------------------------|--------------------------|
| a. I seem to get sick a little easier than other people. | <input type="checkbox"/> | <input type="checkbox"/> | <input type="checkbox"/>            | <input type="checkbox"/> | <input type="checkbox"/> |
| b. I am as healthy as anybody I know.                    | <input type="checkbox"/> | <input type="checkbox"/> | <input type="checkbox"/>            | <input type="checkbox"/> | <input type="checkbox"/> |
| c. I expect my health to get worse.                      | <input type="checkbox"/> | <input type="checkbox"/> | <input checked="" type="checkbox"/> | <input type="checkbox"/> | <input type="checkbox"/> |
| d. My health is excellent.                               | <input type="checkbox"/> | <input type="checkbox"/> | <input type="checkbox"/>            | <input type="checkbox"/> | <input type="checkbox"/> |

51  
52  
53  
54  
55  
56  
57  
58  
59  
60

**Space for additional remarks with the questionnaire:**

## Dutch version

- 1  
2  
3  
4  
5  
6  
7  
8  
9  
10  
11  
12  
13  
14  
15  
16  
17  
18  
19  
20  
21  
22  
23  
24  
25  
26  
27  
28  
29  
30  
31  
32  
33  
34  
35  
36  
37  
38  
39  
40  
41  
42  
43  
44  
45  
46  
47  
48  
49  
50  
51  
52  
53  
54  
55  
56  
57  
58  
59  
60
1. Wat vindt u, over het algemeen genomen, van uw gezondheid?
- uitstekend
  - zeer goed
  - goed
  - matig
  - slecht
2. In vergelijking met 1 jaar geleden, hoe zou u nu uw gezondheid in het algemeen beoordelen?
- veel beter dan een jaar geleden
  - iets beter dan een jaar geleden
  - ongeveer hetzelfde als een jaar geleden
  - iets slechter dan een jaar geleden
  - veel slechter dan een jaar geleden

1  
2  
3  
4  
5  
6  
7  
8  
9  
10  
11  
12  
13  
14  
15  
16  
17  
18  
19  
20  
21  
22  
23  
24  
25  
26  
27  
28  
29  
30  
31  
32  
33  
34  
35  
36  
37  
38  
39  
40  
41  
42  
43  
44  
45  
46  
47  
48  
49  
50  
51  
52  
53  
54  
55  
56  
57  
58  
59  
60

3. De volgende vragen gaan over dagelijkse bezigheden. Wordt u door uw **gezondheid op dit moment** beperkt bij deze bezigheden? Zo ja, in welke mate?

|                                                                                           | Ja, ernstig              | Ja, een beetje beperkt   | Nee, helemaal niet beperkt |
|-------------------------------------------------------------------------------------------|--------------------------|--------------------------|----------------------------|
| a. <i>Forse inspanning</i> (zoals hardlopen, zware voorwerpen tillen, inspannend sporten) | <input type="checkbox"/> | <input type="checkbox"/> | <input type="checkbox"/>   |
| b. <i>Matige inspanning</i> (zoals het verplaatsen van een tafel, stofzuigen, fietsen)    | <input type="checkbox"/> | <input type="checkbox"/> | <input type="checkbox"/>   |
| c. Tillen of boodschappen dragen                                                          | <input type="checkbox"/> | <input type="checkbox"/> | <input type="checkbox"/>   |
| d. <i>Een paar</i> trappen oplopen                                                        | <input type="checkbox"/> | <input type="checkbox"/> | <input type="checkbox"/>   |
| e. <i>Eén</i> trap oplopen                                                                | <input type="checkbox"/> | <input type="checkbox"/> | <input type="checkbox"/>   |
| f. Buigen, knielen of bukken                                                              | <input type="checkbox"/> | <input type="checkbox"/> | <input type="checkbox"/>   |
| g. <i>Meer dan een kilometer</i> lopen                                                    | <input type="checkbox"/> | <input type="checkbox"/> | <input type="checkbox"/>   |
| h. Een halve kilometer lopen                                                              | <input type="checkbox"/> | <input type="checkbox"/> | <input type="checkbox"/>   |
| i. <i>Honderd meter</i> lopen                                                             | <input type="checkbox"/> | <input type="checkbox"/> | <input type="checkbox"/>   |
| j. Uzelf wassen of aankleden                                                              | <input type="checkbox"/> | <input type="checkbox"/> | <input type="checkbox"/>   |

1  
2  
3  
4 4. Had u, ten gevolge van uw **lichamelijke gezondheid**, *de afgelopen 4 weken*  
5 één van de volgende problemen bij uw werk of andere bezigheden?  
6

7  
8 **Ja**

**Nee**

9  
10 a. U heeft *minder tijd* kunnen  
11 besteden aan werk of andere  
12 bezigheden.

13  
14  
15 b. U heeft *minder bereikt* dan u zou  
16 willen.

17  
18  
19 c. U was beperkt in het *soort* werk  
20 of soort bezigheden.

21  
22  
23 d. U had moeite met het werk of  
24 andere bezigheden (het kostte u  
25 bijvoorbeeld extra inspanning).  
26  
27  
28  
29  
30  
31

32 5. Had u, ten gevolge van een **emotioneel probleem** (bijvoorbeeld doordat u  
33 zich depressief of angstig voelde), *de afgelopen 4 weken* één van de  
34 volgende problemen bij uw werk of andere bezigheden?  
35  
36

37  
38 **Ja**

**Nee**

39  
40 a. U heeft *minder tijd* kunnen  
41 besteden aan werk of andere  
42 bezigheden.

43  
44  
45 b. U heeft *minder bereikt* dan u zou  
46 willen.

47  
48  
49 c. U heeft het werk of andere  
50 bezigheden niet zo zorgvuldig  
51 gedaan als u gewend bent.  
52  
53  
54  
55  
56  
57  
58  
59  
60

- 1  
2  
3  
4  
5  
6  
7  
8  
9  
10  
11  
12  
13  
14  
15  
16  
17  
18  
19  
20  
21  
22  
23  
24  
25  
26  
27  
28  
29  
30  
31  
32  
33  
34  
35  
36  
37  
38  
39  
40  
41  
42  
43  
44  
45  
46  
47  
48  
49  
50  
51  
52  
53  
54  
55  
56  
57  
58  
59  
60
6. In hoeverre heeft uw **lichamelijke gezondheid** of hebben uw **emotionele problemen** u *de afgelopen 4 weken* belemmerd in uw normale sociale bezigheden met gezin, vrienden, buren of anderen?
- helemaal niet  
 enigszins  
 nogal  
 veel  
 heel erg veel
7. Hoeveel **pijn** had u *de afgelopen 4 weken*?
- geen  
 heel licht  
 licht  
 nogal  
 ernstig  
 heel ernstig
8. In welke mate heeft **pijn** u *de afgelopen 4 weken* belemmerd bij uw normale werkzaamheden (zowel werk buitenshuis als huishoudelijk werk)?
- helemaal niet  
 enigszins  
 nogal  
 veel  
 heel erg veel

- 1  
2  
3  
4  
5  
6  
7  
8
12. De volgende vragen gaan over hoe u zich *de afgelopen 4 weken* heeft **gevoeld**. Wilt u bij elke vraag het antwoord aankruisen dat het beste aansluit bij hoe u zich heeft gevoeld?

9  
10  
11  
12  
13  
14  
15

Hoe vaak  
gedurende *de*  
*afgelopen 4*  
*weken*:

**Voortdurend**   **Meestal**   **Vaak**   **Soms**   **Zelden**   **Nooit**

- 16  
17  
18  
19  
20  
21  
22  
23  
24  
25  
26  
27  
28  
29  
30  
31  
32  
33  
34  
35  
36  
37  
38  
39  
40  
41  
42  
43  
44  
45  
46  
47  
48  
49  
50  
51  
52  
53  
54  
55  
56  
57  
58  
59  
60
- |    |                                                     |                          |                          |                          |                          |                          |                          |
|----|-----------------------------------------------------|--------------------------|--------------------------|--------------------------|--------------------------|--------------------------|--------------------------|
| a. | voelde u zich levenslustig?                         | <input type="checkbox"/> | <input type="checkbox"/> | <input type="checkbox"/> | <input type="checkbox"/> | <input type="checkbox"/> | <input type="checkbox"/> |
| b. | voelde u zich erg zenuwachtig?                      | <input type="checkbox"/> | <input type="checkbox"/> | <input type="checkbox"/> | <input type="checkbox"/> | <input type="checkbox"/> | <input type="checkbox"/> |
| c. | zat u zo erg in de put dat niets u kon opvrolijken? | <input type="checkbox"/> | <input type="checkbox"/> | <input type="checkbox"/> | <input type="checkbox"/> | <input type="checkbox"/> | <input type="checkbox"/> |
| d. | voelde u zich kalm en rustig?                       | <input type="checkbox"/> | <input type="checkbox"/> | <input type="checkbox"/> | <input type="checkbox"/> | <input type="checkbox"/> | <input type="checkbox"/> |
| e. | voelde u zich erg energiek?                         | <input type="checkbox"/> | <input type="checkbox"/> | <input type="checkbox"/> | <input type="checkbox"/> | <input type="checkbox"/> | <input type="checkbox"/> |
| f. | voelde u zich neerslachtig en somber?               | <input type="checkbox"/> | <input type="checkbox"/> | <input type="checkbox"/> | <input type="checkbox"/> | <input type="checkbox"/> | <input type="checkbox"/> |
| g. | voelde u zich uitgeblust?                           | <input type="checkbox"/> | <input type="checkbox"/> | <input type="checkbox"/> | <input type="checkbox"/> | <input type="checkbox"/> | <input type="checkbox"/> |
| h. | voelde u zich gelukkig?                             | <input type="checkbox"/> | <input type="checkbox"/> | <input type="checkbox"/> | <input type="checkbox"/> | <input type="checkbox"/> | <input type="checkbox"/> |
| i. | voelde u zich moe?                                  | <input type="checkbox"/> | <input type="checkbox"/> | <input type="checkbox"/> | <input type="checkbox"/> | <input type="checkbox"/> | <input type="checkbox"/> |

- 1  
2  
3  
4  
5  
6  
7  
8  
9  
10  
11  
12  
13  
14  
15  
16  
17
10. *Hoe vaak* hebben uw **lichamelijke gezondheid of emotionele problemen** gedurende *de afgelopen 4 weken* uw sociale activiteiten (zoals bezoek aan vrienden of naaste familieleden) belemmerd?
- voortdurend  
 meestal  
 soms  
 zelden  
 nooit

18  
19  
20  
21  
22

11. Wilt u het antwoord kiezen dat het beste weergeeft hoe juist of onjuist u elk van de volgende uitspraken voor uzelf vindt?

23  
24  
25  
26  
27  
28  
29  
30  
31  
32  
33  
34  
35  
36  
37  
38  
39  
40  
41  
42  
43  
44  
45  
46  
47  
48  
49  
50  
51  
52

|                                                            | Volkomen juist           | Grotendeels juist        | Weet ik niet             | Grotendeels onjuist      | Volkomen onjuist         |
|------------------------------------------------------------|--------------------------|--------------------------|--------------------------|--------------------------|--------------------------|
| a. Ik lijk gemakkelijker ziek te worden dan andere mensen. | <input type="checkbox"/> | <input type="checkbox"/> | <input type="checkbox"/> | <input type="checkbox"/> | <input type="checkbox"/> |
| b. Ik ben net zo gezond als andere mensen die ik ken.      | <input type="checkbox"/> | <input type="checkbox"/> | <input type="checkbox"/> | <input type="checkbox"/> | <input type="checkbox"/> |
| c. Ik verwacht dat mijn gezondheid achteruit zal gaan.     | <input type="checkbox"/> | <input type="checkbox"/> | <input type="checkbox"/> | <input type="checkbox"/> | <input type="checkbox"/> |
| d. Mijn gezondheid is uitstekend.                          | <input type="checkbox"/> | <input type="checkbox"/> | <input type="checkbox"/> | <input type="checkbox"/> | <input type="checkbox"/> |

53  
54  
55  
56  
57  
58  
59  
60

Ruimte voor aanvullende opmerkingen bij de vragenlijst:



# BMJ Open

## The role of endoscopic ultrasonography in the diagnostic work-up of idiopathic acute pancreatitis (PICUS): study protocol for a nationwide prospective cohort study

|                               |                                                                                                                                                                                                                                                                                                                                                                                                                                                                                                                                                                                                                                                                                                                                                                                                                                                                                                                                                                                                                                                                                                                                                                                                                                                                                                                                                                                                                                                                                                                                                                                                                                                                                                                                                                                                                                                                                                      |
|-------------------------------|------------------------------------------------------------------------------------------------------------------------------------------------------------------------------------------------------------------------------------------------------------------------------------------------------------------------------------------------------------------------------------------------------------------------------------------------------------------------------------------------------------------------------------------------------------------------------------------------------------------------------------------------------------------------------------------------------------------------------------------------------------------------------------------------------------------------------------------------------------------------------------------------------------------------------------------------------------------------------------------------------------------------------------------------------------------------------------------------------------------------------------------------------------------------------------------------------------------------------------------------------------------------------------------------------------------------------------------------------------------------------------------------------------------------------------------------------------------------------------------------------------------------------------------------------------------------------------------------------------------------------------------------------------------------------------------------------------------------------------------------------------------------------------------------------------------------------------------------------------------------------------------------------|
| Journal:                      | <i>BMJ Open</i>                                                                                                                                                                                                                                                                                                                                                                                                                                                                                                                                                                                                                                                                                                                                                                                                                                                                                                                                                                                                                                                                                                                                                                                                                                                                                                                                                                                                                                                                                                                                                                                                                                                                                                                                                                                                                                                                                      |
| Manuscript ID                 | bmjopen-2019-035504.R2                                                                                                                                                                                                                                                                                                                                                                                                                                                                                                                                                                                                                                                                                                                                                                                                                                                                                                                                                                                                                                                                                                                                                                                                                                                                                                                                                                                                                                                                                                                                                                                                                                                                                                                                                                                                                                                                               |
| Article Type:                 | Protocol                                                                                                                                                                                                                                                                                                                                                                                                                                                                                                                                                                                                                                                                                                                                                                                                                                                                                                                                                                                                                                                                                                                                                                                                                                                                                                                                                                                                                                                                                                                                                                                                                                                                                                                                                                                                                                                                                             |
| Date Submitted by the Author: | 10-Jun-2020                                                                                                                                                                                                                                                                                                                                                                                                                                                                                                                                                                                                                                                                                                                                                                                                                                                                                                                                                                                                                                                                                                                                                                                                                                                                                                                                                                                                                                                                                                                                                                                                                                                                                                                                                                                                                                                                                          |
| Complete List of Authors:     | <p>Umans, Devica; Amsterdam University Medical Centres, Department of Gastroenterology and Hepatology; Saint Antonius Hospital, Research and Development<br/> Timmerhuis, Hester; Saint Antonius Hospital, Department of Surgery; Saint Antonius Hospital, Research and Development<br/> Hallensleben, Nora ; Erasmus Medical Center, Department of Gastroenterology and Hepatology; Saint Antonius Hospital, Research and Development<br/> Bouwense, Stefan; Maastricht UMC+, Department of Surgery<br/> Anten, Marie-Paule; Franciscus Gasthuis en Vlietland, Department of Gastroenterology and Hepatology<br/> Bhalla, Abha; HagaZiekenhuis, Department of Gastroenterology and Hepatology<br/> Bijlsma, Rina; Martini Ziekenhuis, Department of Gastroenterology and Hepatology<br/> Boermeester, Marja; Amsterdam University Medical Centres, Department of Surgery<br/> Brink, Menno; Meander MC, Department of Gastroenterology and Hepatology<br/> Hol, Lieke; Maasstad Hospital, Department of Gastroenterology and Hepatology<br/> Bruno, Marco; Erasmus Medical Center, Department of Gastroenterology and Hepatology<br/> Curvers, Wouter; Catharina Hospital, Department of Gastroenterology and Hepatology<br/> van Dullemen, Hendrik; UMCG, Department of Gastroenterology and Hepatology<br/> van Eijck, Brechje; Spaarne Gasthuis, Department of Gastroenterology and Hepatology<br/> Erkelens, G; Gelre Ziekenhuizen, Department of Gastroenterology and Hepatology<br/> Fockens, Paul; Amsterdam University Medical Centres, Department of Gastroenterology and Hepatology<br/> van Geenen, Erwin; Radboudumc<br/> Hazen, Wouter; Elisabeth-TweeSteden Ziekenhuis, Department of Gastroenterology and Hepatology<br/> Hoge, Chantal; Maastricht UMC+, Department of Gastroenterology and Hepatology<br/> Inderson, Akin; LUMC, Department of Gastroenterology and Hepatology</p> |

|                                 |                                                                                                                                                                                                                                                                                                                                                                                                                                                                                                                                                                                                                                                                                                                                                                                                                                                                                                                                                                                                                                                                                                                                                                                                                                                                                                                                                                                                                                                                                                                                |
|---------------------------------|--------------------------------------------------------------------------------------------------------------------------------------------------------------------------------------------------------------------------------------------------------------------------------------------------------------------------------------------------------------------------------------------------------------------------------------------------------------------------------------------------------------------------------------------------------------------------------------------------------------------------------------------------------------------------------------------------------------------------------------------------------------------------------------------------------------------------------------------------------------------------------------------------------------------------------------------------------------------------------------------------------------------------------------------------------------------------------------------------------------------------------------------------------------------------------------------------------------------------------------------------------------------------------------------------------------------------------------------------------------------------------------------------------------------------------------------------------------------------------------------------------------------------------|
|                                 | <p>Kager, Liesbeth; Noordwest Ziekenhuisgroep, Department of Gastroenterology and Hepatology</p> <p>Kuiken, Sjoerd; OLVG, Department of Gastroenterology and Hepatology</p> <p>Perk, Lars; Medisch Centrum Haaglanden, Department of Gastroenterology and Hepatology</p> <p>Poley, Jan-Werner</p> <p>Quispel, Rutger; Reinier de Graaf Groep, Department of Gastroenterology and Hepatology</p> <p>Römkens, Tessa; Jeroen Bosch Hospital, Department of Gastroenterology and Hepatology</p> <p>van Santvoort, Hjalmar ; University Medical Center Utrecht; Saint Antonius Hospital, Department of Surgery</p> <p>Tan, Adriaan; Canisius Wilhelmina Hospital, Department of Gastroenterology and Hepatology</p> <p>Thijssen, Annemieke; Albert Schweitzer Ziekenhuis, Department of Gastroenterology and Hepatology</p> <p>Venneman, Niels ; Medisch Spectrum Twente, Department of Gastroenterology and Hepatology</p> <p>Vleggaar, Frank; Universitair Medisch Centrum Utrecht</p> <p>Voorburg, Annet ; Diaconessenhuis Utrecht Zeist Doorn, Department of Gastroenterology and Hepatology</p> <p>van Wanrooij, Roy; Amsterdam University Medical Centres, Department of Gastroenterology and Hepatology</p> <p>Witteman, Ben; Ziekenhuis Gelderse Vallei, Department of Gastroenterology and Hepatology</p> <p>Verdonk, Robert; Saint Antonius Hospital, Department of Gastroenterology and Hepatology</p> <p>Besselink, Marc; Amsterdam University Medical Centres, Department of Surgery</p> <p>van Hooft, Jeanin; AMC</p> |
| <b>Primary Subject Heading</b>: | Gastroenterology and hepatology                                                                                                                                                                                                                                                                                                                                                                                                                                                                                                                                                                                                                                                                                                                                                                                                                                                                                                                                                                                                                                                                                                                                                                                                                                                                                                                                                                                                                                                                                                |
| Secondary Subject Heading:      | Evidence based practice, Research methods                                                                                                                                                                                                                                                                                                                                                                                                                                                                                                                                                                                                                                                                                                                                                                                                                                                                                                                                                                                                                                                                                                                                                                                                                                                                                                                                                                                                                                                                                      |
| Keywords:                       | Endoscopy < GASTROENTEROLOGY, Hepatobiliary disease < GASTROENTEROLOGY, Pancreatic disease < GASTROENTEROLOGY                                                                                                                                                                                                                                                                                                                                                                                                                                                                                                                                                                                                                                                                                                                                                                                                                                                                                                                                                                                                                                                                                                                                                                                                                                                                                                                                                                                                                  |
|                                 |                                                                                                                                                                                                                                                                                                                                                                                                                                                                                                                                                                                                                                                                                                                                                                                                                                                                                                                                                                                                                                                                                                                                                                                                                                                                                                                                                                                                                                                                                                                                |

SCHOLARONE™  
Manuscripts



I, the Submitting Author has the right to grant and does grant on behalf of all authors of the Work (as defined in the below author licence), an exclusive licence and/or a non-exclusive licence for contributions from authors who are: i) UK Crown employees; ii) where BMJ has agreed a CC-BY licence shall apply, and/or iii) in accordance with the terms applicable for US Federal Government officers or employees acting as part of their official duties; on a worldwide, perpetual, irrevocable, royalty-free basis to BMJ Publishing Group Ltd ("BMJ") its licensees and where the relevant Journal is co-owned by BMJ to the co-owners of the Journal, to publish the Work in this journal and any other BMJ products and to exploit all rights, as set out in our [licence](#).

The Submitting Author accepts and understands that any supply made under these terms is made by BMJ to the Submitting Author unless you are acting as an employee on behalf of your employer or a postgraduate student of an affiliated institution which is paying any applicable article publishing charge ("APC") for Open Access articles. Where the Submitting Author wishes to make the Work available on an Open Access basis (and intends to pay the relevant APC), the terms of reuse of such Open Access shall be governed by a Creative Commons licence – details of these licences and which [Creative Commons](#) licence will apply to this Work are set out in our licence referred to above.

Other than as permitted in any relevant BMJ Author's Self Archiving Policies, I confirm this Work has not been accepted for publication elsewhere, is not being considered for publication elsewhere and does not duplicate material already published. I confirm all authors consent to publication of this Work and authorise the granting of this licence.

1  
2  
3  
4 1 The role of endoscopic ultrasonography in the diagnostic work-up of  
5  
6  
7 2 idiopathic acute pancreatitis (PICUS): study protocol for a nationwide  
8  
9  
10  
11 3 prospective cohort study  
12  
13  
14 4

15  
16 5 Devica S Umans<sup>1,2</sup>, Hester C Timmerhuis<sup>2,3</sup>, Nora DL Hallensleben<sup>2,4</sup>, Stefan A Bouwense<sup>5</sup>, Marie-Paule  
17  
18 6 GF Anten<sup>6</sup>, Abha Bhalla<sup>7</sup>, Rina A Bijlsma<sup>8</sup>, Marja A Boermeester<sup>9</sup>, Menno A Brink<sup>10</sup>, Lieke Hol<sup>11</sup>, Marco J  
19  
20 7 Bruno<sup>4</sup>, Wouter L Curvers<sup>12</sup>, Hendrik M van Dullemen<sup>13</sup>, Brechje C van Eijck<sup>14</sup>, G Willemien Erkelens<sup>15</sup>,  
21  
22 8 Paul Fockens<sup>1</sup>, Erwin JM van Geenen<sup>16</sup>, Wouter L Hazen<sup>17</sup>, Chantal V Hoge<sup>18</sup>, Akin Inderson<sup>19</sup>, Liesbeth  
23  
24 9 M Kager<sup>20</sup>, Sjoerd D Kuiken<sup>21</sup>, Lars E Perk<sup>22</sup>, Jan-Werner Poley<sup>4</sup>, Rutger Quispel<sup>23</sup>, Tessa EH Römken<sup>24</sup>,  
25  
26 10 Hjalmar C van Santvoort<sup>3,25</sup>, Adriaan CITL Tan<sup>26</sup>, Annemieke Y Thijssen<sup>27</sup>, Niels G Venneman<sup>28</sup>, Frank P  
27  
28 11 Vleggaar<sup>29</sup>, Annet MCJ Voorburg<sup>30</sup>, Roy LJ van Wanrooij<sup>31</sup>, Ben J Witteman<sup>32</sup>, Robert C Verdonk<sup>33</sup>, Marc  
29  
30 12 G Besselink<sup>8</sup>, Jeanin E van Hooft<sup>1</sup>, for the Dutch Pancreatitis Study Group  
31  
32  
33  
34  
35  
36  
37  
38  
39  
40  
41  
42  
43  
44  
45  
46  
47  
48  
49  
50  
51  
52  
53  
54  
55  
56  
57  
58  
59  
60

14 <sup>1</sup> Department of Gastroenterology and Hepatology, Amsterdam Gastroenterology and Metabolism, Amsterdam UMC,  
15 University of Amsterdam, Amsterdam, the Netherlands

16 <sup>2</sup> Department of Research and Development, St. Antonius Hospital, Nieuwegein, the Netherlands

17 <sup>3</sup> Department of Surgery, St. Antonius Hospital, Nieuwegein, the Netherlands

18 <sup>4</sup> Department of Gastroenterology and Hepatology, Erasmus Medical Center, Rotterdam, the Netherlands

19 <sup>5</sup> Department of Surgery, Maastricht UMC+, Maastricht, the Netherlands

20 <sup>6</sup> Department of Gastroenterology and Hepatology, Franciscus Gasthuis & Vlietland, Rotterdam, the Netherlands

21 <sup>7</sup> Department of Gastroenterology and Hepatology, Haga Hospital, Den Haag, the Netherlands

22 <sup>8</sup> Department of Gastroenterology and Hepatology, Martini Hospital, Groningen, the Netherlands

23 <sup>9</sup> Department of Surgery, Amsterdam UMC, University of Amsterdam, Amsterdam, the Netherlands

- 1  
2  
3 24 <sup>10</sup> Department of Gastroenterology and Hepatology, Meander Medical Center, Amersfoort, the Netherlands  
4  
5 25 <sup>11</sup> Department of Gastroenterology and Hepatology, Maasstad Hospital, Rotterdam, the Netherlands  
6  
7  
8 26 <sup>12</sup> Department of Gastroenterology and Hepatology, Catharina Hospital, Eindhoven, the Netherlands  
9  
10 27 <sup>13</sup> Department of Gastroenterology and Hepatology, University Medical Center Groningen, Groningen, the Netherlands  
11  
12  
13 28 <sup>14</sup> Department of Gastroenterology and Hepatology, Spaarne Gasthuis, Haarlem, the Netherlands  
14  
15 29 <sup>15</sup> Department of Gastroenterology and Hepatology, Gelre Hospital, Apeldoorn, the Netherlands  
16  
17  
18 30 <sup>16</sup> Department of Gastroenterology and Hepatology, Radboud university medical center, Nijmegen, the Netherlands  
19  
20 31 <sup>17</sup> Department of Gastroenterology and Hepatology, Elisabeth-Tweesteden Hospital, Tilburg, the Netherlands  
21  
22  
23 32 <sup>18</sup> Department of Gastroenterology and Hepatology, Maastricht University Medical Center, Maastricht, the Netherlands  
24  
25 33 <sup>19</sup> Department of Gastroenterology and Hepatology, Leiden University Medical Center, Leiden, the Netherlands  
26  
27  
28 34 <sup>20</sup> Department of Gastroenterology and Hepatology, Noordwest Ziekenhuisgroep, Alkmaar, the Netherlands  
29  
30 35 <sup>21</sup> Department of Gastroenterology and Hepatology, OLVG, Amsterdam, the Netherlands  
31  
32  
33 36 <sup>22</sup> Department of Gastroenterology and Hepatology, Medical Center Haaglanden, Den Haag, the Netherlands  
34  
35 37 <sup>23</sup> Department of Gastroenterology and Hepatology, Reinier de Graaf Gasthuis, Delft, the Netherlands  
36  
37  
38 38 <sup>24</sup> Department of Gastroenterology and Hepatology, Jeroen Bosch Hospital, Den Bosch, the Netherlands  
39  
40 39 <sup>25</sup> Department of Surgery, UMC Utrecht, Utrecht, the Netherlands  
41  
42  
43 40 <sup>26</sup> Department of Gastroenterology and Hepatology, Canisius-Wilhelmina Hospital, Nijmegen, the Netherlands  
44  
45 41 <sup>27</sup> Department of Gastroenterology and Hepatology, Albert Schweitzer Hospital, Dordrecht, the Netherlands  
46  
47  
48 42 <sup>28</sup> Department of Gastroenterology and Hepatology, Medisch Spectrum Twente, Enschede, the Netherlands  
49  
50 43 <sup>29</sup> Department of Gastroenterology and Hepatology, University Medical Center Utrecht, the Netherlands  
51  
52  
53 44 <sup>30</sup> Department of Gastroenterology and Hepatology, Diaconessenhuis, Utrecht, the Netherlands  
54  
55 45 <sup>31</sup> Department of Gastroenterology and Hepatology, Amsterdam Gastroenterology and Metabolism, Amsterdam UMC, Vrije  
56  
57 46 Universiteit van Amsterdam, Amsterdam, the Netherlands  
58  
59 47 <sup>32</sup> Department of Gastroenterology and Hepatology, Hospital Gelderse Vallei, Ede, the Netherlands  
60

1  
2  
3 48 <sup>33</sup> Department of Gastroenterology and Hepatology, St. Antonius Hospital, Nieuwegein, the Netherlands  
4  
5  
6 49  
7

8 50 **Correspondence**

9  
10 51 Dr. Jeanin E. van Hooft, MD, PhD, MBA

11  
12  
13 52 Amsterdam UMC, location AMC

14  
15  
16 53 Department of Gastroenterology and Hepatology, C2-115

17  
18  
19 54 PO Box 22660

20  
21  
22 55 1100 DD Amsterdam

23  
24  
25 56 The Netherlands

26  
27  
28 57 Telephone: +31 20 566 7918

29  
30  
31 58 E-mail: j.e.vanhooft@amsterdamumc.nl / j.e.van\_hooft@lumc.nl

32  
33  
34 59

35  
36 60 **Correspondence during review phase**

37  
38  
39 61 Devica S Umans

40  
41  
42 62 Telephone: +31 88 320 7051

43  
44  
45 63 E-mail: d.s.umans@amsterdamumc.nl

46  
47  
48 64

49  
50  
51 65

52  
53 66 **List of abbreviations**

54  
55  
56 67 ALT = alanine aminotransferase

57  
58  
59 68 BMI = body mass index

60

1  
2  
3 69 CI = confidence interval  
4  
5

6 70 CRF = case report form  
7  
8

9 71 CT = computed tomography  
10  
11

12 72 ERCP = endoscopic retrograde cholangiopancreatography  
13  
14

15 73 EUS = endoscopic ultrasonography  
16  
17

18 74 GRADE = Grading of Recommendations Assessment, Development and Evaluation  
19  
20

21 75 IAP = idiopathic acute pancreatitis  
22  
23

24 76 IAP/APA = International Association of Pancreatology/American Pancreatic Association  
25  
26

27 77 IPMN = intraductal papillary mucinous neoplasm  
28  
29

30 78 IQR = interquartile range  
31  
32

33 79 MRCP = magnetic resonance cholangiopancreatography  
34  
35

36 80 MRI = magnetic resonance imaging  
37  
38

39 81  
40  
41

42 82  
43  
44

45 83 **Word count**

46 84 Word count excluding title page, abstract, article summary (strengths and limitations), key words,  
47  
48

49 85 tables, figure legend, author statement and references: 3573  
50  
51

52 86  
53  
54

55 87  
56  
57  
58  
59  
60

1  
2  
3 88 Abstract

4  
5  
6 89 Introduction

7  
8 90 Idiopathic acute pancreatitis (IAP) remains a dilemma for physicians as it is uncertain whether patients  
9  
10 91 with IAP may actually have an occult etiology. It is unclear to what extent additional diagnostic  
11  
12 92 modalities such as endoscopic ultrasonography (EUS) are warranted after a first episode of IAP in order  
13  
14 93 to uncover this etiology. Failure to timely determine treatable etiologies delays appropriate treatment  
15  
16 94 and might subsequently cause recurrence of acute pancreatitis. Therefore, the aim of the “Pancreatitis  
17  
18 95 of Idiopathic origin: Clinical added value of endoscopic UltraSonography” (PICUS) study is to determine  
19  
20 96 the value of routine EUS in determining the etiology of pancreatitis in patients with a first episode of  
21  
22 97 IAP.  
23  
24  
25  
26  
27  
28  
29

30 99 Methods and analysis

31  
32 100 PICUS is designed as a multicenter prospective cohort study of 106 patients with a first episode of IAP  
33  
34 101 after complete standard diagnostic work-up, in whom a diagnostic EUS will be performed. Standard  
35  
36 102 diagnostic work-up will include a complete personal and family history, laboratory tests including  
37  
38 103 serum alanine aminotransferase, calcium and triglyceride levels, and imaging by transabdominal  
39  
40 104 ultrasound, magnetic resonance imaging or magnetic resonance cholangiopancreatography after  
41  
42 105 clinical recovery from the acute pancreatitis episode. The primary outcome measure is detection of  
43  
44 106 etiology by EUS. Secondary outcome measures include pancreatitis recurrence rate, severity of  
45  
46 107 recurrent pancreatitis, readmission, additional interventions, complications, length of hospital stay,  
47  
48 108 quality of life, mortality and costs, during a follow-up period of 12 months.  
49  
50  
51  
52  
53  
54  
55  
56  
57  
58  
59  
60



1  
2  
3 110 Ethics and dissemination  
4

5 111 PICUS is conducted according to the Declaration of Helsinki and Guideline for Good Clinical Practice.  
6

7  
8 112 Five Medical Ethics Review Committees assessed PICUS (Medical Ethics Review Committee of  
9

10 113 Academic Medical Center, University Medical Center Utrecht, Radboud university medical center,  
11

12 114 Erasmus Medical Center and Maastricht University Medical Center). The results will be submitted for  
13

14 115 publication in an international peer-reviewed journal.  
15  
16

17 116  
18  
19

20 117 Trial registration  
21

22  
23 118 Netherlands Trial Register: NL7066, June 9<sup>th</sup> 2018. Prospectively registered.  
24  
25

26 119  
27  
28

29 120  
30  
31

32 121 Article summary: strengths and limitations  
33

34 122 • This is the first prospective cohort study of only patients with a single episode of presumed  
35 123 IAP.

36 124 • This is the first prospective cohort study which only includes patients after complete  
37 125 standard diagnostic work-up (including exclusion based on blood serum ALT and imaging  
38 126 after clinical recovery).

39 127 • The multicenter nature of this study reduces the risk of patient selection bias.  
40  
41

42 128 • This study has a follow-up time of a year, and thus this study could elucidate the previously  
43 129 hypothesized association between EUS, detection of etiology and subsequent treatment of  
44 130 etiology, and pancreatitis recurrence.

45 131 • As the timing of the EUS is set to be after clinical recovery from pancreatitis in this trial, no  
46 132 conclusions on the diagnostic yield of EUS in a different time frame can be drawn from this  
47 133 study.  
48  
49  
50  
51  
52  
53  
54  
55  
56  
57  
58  
59  
60

134

## 135 Keywords

136 Idiopathic acute pancreatitis; endoscopic ultrasonography, etiology

137

138

## 139 Background

140 Acute pancreatitis can be induced by numerous causes. Gallstone disease (approximately 50%) and  
141 alcohol (approximately 20%) are the most frequent causes (1-6), although the prevalence of etiologies  
142 of acute pancreatitis is dependent on, among other things, age and geographical factors (7-10). There  
143 is, however, a considerable group of patients of approximately 25% in whom no etiology can be found  
144 after routine diagnostic work-up (i.e. medical history, laboratory investigations and transabdominal  
145 ultrasound). These patients are considered to have presumed idiopathic acute pancreatitis (IAP) (3).

146 When IAP is presumed, guidelines recommend repeat transabdominal ultrasound after  
147 discharge (11, 12). This repeat ultrasonography has an additional diagnostic yield of 20% for the  
148 detection of gallstones or sludge in these patients (13). Undetected microlithiasis and biliary sludge  
149 are generally considered to be the major cause of presumed IAP (14, 15). Undetected and subsequently  
150 untreated gallstone disease poses a risk for recurrent acute pancreatitis and other biliary events, e.g.  
151 cholecystitis, biliary colic's and cholangitis.

152 Therefore, when previous diagnostics failed to uncover an etiology, endoscopic  
153 ultrasonography (EUS) should be considered for the detection of biliary disease or other abnormalities  
154 causing pancreatitis, such as neoplasms and chronic pancreatitis (11, 12, 16, 17). EUS is advised as the  
155 first step in presumed IAP, followed by (secretin-enhanced) magnetic resonance  
156 cholangiopancreaticography (MRCP) to identify rare morphologic abnormalities (11), as EUS is  
157 considered to have a higher diagnostic yield than MRCP for clinically relevant causes (18).

1  
2  
3 158 Although guidelines do recommend performing EUS after a first or second attack of presumed  
4  
5 159 IAP, this recommendation is scored as a mere grade 2C, according to the Grading of Recommendations  
6  
7 160 Assessment, Development and Evaluation (GRADE) classification (19) (indicating a weak  
8  
9  
10 161 recommendation based on evidence of low quality, with weak agreement among experts in this field)  
11  
12 162 (11). Therefore, EUS is not routinely performed as the exact significance in this patient group is unclear  
13  
14 163 (11, 16).

15  
16  
17 164 The PICUS study was designed to determine whether routine EUS should be incorporated in  
18  
19 165 the standard diagnostic work-up of a first episode of presumed IAP.  
20  
21  
22  
23 166  
24  
25 167  
26  
27

## 28 168 Methods and analysis

### 29 30 31 169 Study aim

32  
33 170 The objective of this study is to determine the diagnostic yield of EUS for the detection of etiology in  
34  
35 171 patients with a first episode of presumed IAP.  
36  
37  
38

39 172 Depending on the diagnostic yield of EUS observed in the PICUS study, incorporation of EUS  
40  
41 173 in routine diagnostic work-up of patients with a first episode of presumed IAP will be considered. A  
42  
43 174 minimal diagnostic yield of 10% for any etiology will be regarded as reasonable to justify implementing  
44  
45 175 routine EUS in the standard diagnostic work-up of a first episode of presumed IAP.  
46  
47  
48  
49 176  
50  
51

### 52 177 Study design and setting

53  
54 178 PICUS is a multicenter prospective cohort study. A total of 106 patients will be included from 28  
55  
56 179 participating Dutch centers, including all 8 university centers and 20 large teaching hospitals. A listing  
57  
58  
59  
60

1  
2  
3 180 of the participating centers is included in the Authors' information. An overview of the study design,  
4  
5 181 including screening procedures and follow-up, is provided in figure 1.  
6  
7

8 182

### 11 183 Study population

13 184 The subjects of this study have had a first episode of acute pancreatitis, as defined by the 2012 Revised  
14  
15  
16 185 Atlanta criteria (20), with an unknown origin after standard diagnostic work-up, according to the 2013  
17  
18 186 International Association of Pancreatology/American Pancreatic Association (IAP/APA) evidence-  
19  
20 187 based guidelines on management of acute pancreatitis (11). The diagnostic modalities that constitute  
21  
22 188 standard diagnostic work-up are listed in table 1 and additional file 1. The diagnostic tests as laid out  
23  
24 189 in table 1 are to be performed in all subjects and these tests cannot show any signs of an etiology in  
25  
26 190 all subjects. Potential etiologies and their definitions are listed in table 2 and additional file 1.  
27  
28  
29

30 191

### 32 192 Eligibility criteria

34 193 The inclusion criteria are:

- 36  
37  
38 194 1. Patients of 18 years or older  
39  
40 195 2. First episode of presumed IAP after standard diagnostic work-up, as defined by the IAP/APA  
41  
42 196 evidence-based guidelines on management of acute pancreatitis (11)  
43  
44 197 3. Informed consent for participation  
45  
46

47 198

49 199 The exclusion criteria are:

- 51  
52  
53 200 1. Known etiology  
54  
55 201 2. Chronic pancreatitis, as defined by the M-ANNHEIM criteria (21)  
56  
57 202 3. Recurrent pancreatitis  
58  
59  
60

- 1  
2  
3 203 4. Altered anatomy which prohibits the endosonographer from visualizing the gall bladder, bile  
4  
5 204 ducts, pancreas or pancreatic duct via EUS (e.g. gastric bypass surgery)  
6  
7 205 5. Diagnostic EUS aimed to determine etiology before inclusion  
8  
9

10  
11 206

12  
13 207 Endoscopic ultrasonography

14  
15 208 EUS will be performed in routine clinical practice by an endosonographer. Use of linear or radial EUS  
16  
17 209 will be at the discretion of the endosonographer. All Dutch endosonographers are trained to perform  
18  
19 210 EUS according to the technique of Hawes and Fockens (22).  
20  
21  
22

23 211 The endosonographer will systematically report, using a standardized Case Report Form (CRF),  
24  
25 212 the experience of the endosonographer, visualization of anatomical structures (i.e. gall bladder,  
26  
27 213 common bile duct and pancreatic duct), presence of local complications of acute pancreatitis,  
28  
29 214 characteristics of biliary etiology (i.e. gallstones, microlithiasis and/or biliary sludge), characteristics of  
30  
31 215 chronic pancreatitis, presence of (a) pancreatic or peri-ampullary benign or malignant tumor(s),  
32  
33 216 characteristics of auto-immune pancreatitis, anatomic variations (e.g. pancreas divisum) or other  
34  
35 217 anomalies (e.g. cholecystitis, vascular, renal, splenic or hepatic anomalies or ascites), and performance  
36  
37 218 of fine needle aspiration or fine needle biopsy. Additionally, the type of endoscope, use of sedation,  
38  
39 219 procedure related complications and results of the fine needle aspiration or biopsy will be  
40  
41 220 systematically recorded by the study coordinator in a separate CRF.  
42  
43  
44  
45

46 221

47  
48  
49 222 Primary outcome measure

50  
51 223 The primary outcome measure is the number and ratio of patients with presumed IAP in whom EUS  
52  
53 224 detects a cause for the pancreatitis episode.  
54  
55

56 225 A positive EUS is defined as an EUS during which a definitive cause for the acute pancreatitis  
57  
58 226 episode has been found; or during which abnormalities are visualized constituting a definitive cause,  
59  
60

227 after obtaining tissue and pathological examination. An overview of the exact findings scored as  
228 positive imaging is provided in table 3.

229 If during EUS pancreatic abnormalities are found, yet not enough to make a certain diagnosis  
230 of chronic pancreatitis according to the M-ANNHEIM classification (21), this imaging is considered to  
231 be negative, even though it did show abnormalities. This approach is chosen because the aim of this  
232 study is to determine the rate of which EUS can find a cause for the presumed IAP episode. For the  
233 same reason, report of an anatomical abnormality during EUS after a first episode of acute pancreatitis  
234 is not scored as positive imaging as pancreatic morphological changes are very common in IAP and not  
235 necessarily clinically relevant, as is elaborated on in the discussion (23).

236

#### 237 Secondary outcome measures

238 The secondary outcome measures are recurrence rate of acute pancreatitis, severity of recurrent  
239 pancreatitis (20), readmission, performance of additional invasive procedures (e.g. cholecystectomy,  
240 endoscopic sphincterotomy), complications of EUS and of additional interventions, according to the  
241 Clavien-Dindo classification (24), length of hospital stay, quality of life, mortality and costs. Relevant  
242 definitions are reported in Additional File 2.

243

#### 244 Sample size calculation

245 The sample size calculation was based on the primary outcome measure, diagnostic yield of EUS. Based  
246 on two previous studies reporting yield in patients with a first episode of presumed IAP (25, 26),  
247 adjusted for the PICUS study criteria for inclusion (i.e. requiring negative imaging after clinical  
248 recovery) and for positive imaging (i.e. excluding pancreas divisum as etiology), diagnostic yield was  
249 assumed to be 30%. Using a two-sided significance level ( $\alpha$ ) of 0.05, a power ( $1 - \beta$ ) of 80%, 95 patients  
250 are needed to attain a 95% confidence interval (CI) with a range smaller than 10% above and below

1  
2  
3 251 the assumed yield of 30% (95% CI: 20.8, 39.2). Assuming a drop-out rate of 10%, a total of 106 patients  
4  
5 252 will be included (27). The sample size was calculated using the software programs RStudio (28) and  
6  
7 253 nQuery (29).  
8  
9

10  
11 254

### 12 13 255 Follow-up

14  
15  
16 256 Data from patient records on primary and secondary outcome measures will be collected until 1 year  
17  
18 257 after inclusion. Outpatient care and follow-up after the EUS is at the discretion of the treating  
19  
20 258 physician, but an outpatient clinic visit after EUS to discuss the results of the EUS and potential  
21  
22 259 subsequent appropriate treatment can be considered standard care.  
23  
24

25  
26 260 In case of biliary disease, the patient will be considered for endoscopic retrograde  
27  
28 261 cholangiopancreatography (ERCP) with sphincterotomy when choledocho(-micro-)lithiasis or sludge  
29  
30 262 in the common bile duct is present, and cholecystectomy, as is standard care for biliary pancreatitis. A  
31  
32 263 (secretin-enhanced) MRCP will be recommended, if not performed earlier, if a patient is readmitted  
33  
34 264 for a recurrent episode of acute pancreatitis after a negative EUS for etiology, in order to rule out  
35  
36 265 structural anomalies such as pancreas divisum. This is in accordance with current guidelines (11).  
37  
38

39  
40 266 Patients will be asked to fill out the Short Form-36 questionnaire in the validated Dutch  
41  
42 267 translation on day 3 after inclusion, after 6 months and after 1 year. This questionnaire in both English  
43  
44 268 and Dutch is included in additional file 3.  
45  
46

47 269

### 48 49 50 270 Statistical aspects

51  
52 271 All included subjects will be evaluated for primary and secondary endpoints until 1 year after inclusion.  
53  
54 272 The primary analysis will be based on intention-to-treat principles. For exploratory reasons a per-  
55  
56 273 protocol analysis will be performed too.  
57  
58  
59  
60

1  
2  
3 274 The intention-to-treat population comprises all patients included in the study, regardless of  
4  
5 275 adherence to study protocol. The per-protocol population is the subset of included patients who were  
6  
7 276 treated with the guidelines of the protocol (i.e. meeting all eligibility criteria including all of the  
8  
9  
10 277 diagnostic tests required for the diagnosis of IAP, undergoing EUS as described in the “Endoscopic  
11  
12 278 ultrasonography section”). A tabular listing of all patients excluded from the intention-to-treat  
13  
14 279 population will be provided together with the reasons for exclusion.

15  
16  
17 280 All analyses will be performed in SPSS for Microsoft Windows. All data handling and analysis  
18  
19 281 will be saved in a syntax-file. Results will be presented with all centers combined. A two-tailed p-value  
20  
21  
22 282 of  $< 0.05$  is considered statistically significant.

23  
24  
25 283

26  
27  
28 284 ***Baseline variables***

29  
30 285 The reported baseline characteristics consist of age, sex, body mass index (BMI), previous  
31  
32 286 cholecystectomy, nicotine and alcohol use, severity of pancreatitis, length of hospital stay, amylase,  
33  
34 287 lipase, C-reactive protein, alanine transaminase, calcium, albumin and triglycerides levels in blood  
35  
36  
37 288 serum on admission, imaging modalities before EUS and their findings. Baseline characteristics of EUS  
38  
39 289 will include timing of EUS, experience of endosonographer and type of sedation and type of endoscope  
40  
41 290 used. Data will be presented in percentages or as mean with standard deviation, or in case of a skewed  
42  
43 291 distribution as median with interquartile range (IQR).

44  
45  
46  
47 292

48  
49  
50 293 ***Primary outcome measure: etiology detection rate***

51  
52 294 Overall detection rate of an etiology for the episode of acute pancreatitis will be presented as  
53  
54 295 percentage with a 95% CI. Predefined subgroup analyses will be made for patients with and without  
55  
56 296 obesity (cut-off at a BMI of 30), a previous cholecystectomy, alcohol use and local complications from  
57  
58  
59 297 the IAP episode. A subgroup analysis will also be made for patients with a transabdominal ultrasound  
60



1  
2  
3 298 as imaging after clinical recovery and with magnetic resonance imaging (MRI) or MRCP as imaging after  
4  
5 299 clinical recovery. Finally, a subgroup analysis will be made for EUS performed by endosonographers  
6  
7 300 with and without extensive experience (cut-off at 400 endosonographies performed), use of linear or  
8  
9  
10 301 radial scope and type of sedation used. In subgroup analyses, the Chi-square test or the Fisher's exact  
11  
12 302 test will be used, as appropriate, to compare etiology detection rate between subgroups. In subgroup  
13  
14 303 analyses, comparability between groups regarding baseline variables will be checked. If the subgroups  
15  
16 304 differ statistically significantly in one or more baseline variables, this will be corrected in a logistic  
17  
18  
19 305 regression analysis.  
20  
21  
22 306

### 25 307 ***Secondary outcome measures***

26  
27 308 Secondary outcome measures will be described as percentages with 95% CI, as mean with standard  
28  
29 309 deviation or median with IQR, as appropriate.  
30  
31

32  
33 310 For recurrence rate, subgroup analyses will be made for patients with a positive and negative  
34  
35 311 EUS, and in patients with a positive EUS, for patients who were and were not treated adequately. The  
36  
37 312 same subgroup analyses as in the primary outcome measure, will also be applied on the recurrence  
38  
39 313 rate. The Chi-square test or the Fisher's exact test will be used for comparison between subgroups, as  
40  
41 314 appropriate.  
42  
43

44  
45 315 For quality of life, subgroup analyses will be made for baseline versus follow-up quality of life  
46  
47 316 and for patients with a positive and negative EUS, and with and without pancreatitis recurrence during  
48  
49 317 follow-up. The (un-)paired T-test, Wilcoxon signed rank test or the Mann-Whitney U test will be used  
50  
51 318 for comparisons between subgroups, as appropriate.  
52  
53

54 319  
55  
56  
57  
58  
59  
60

### 320 **Cost analysis**

321 The cost analysis will comprise direct medical costs, which are generated by healthcare utilization and  
322 include hospital admission periods and therapeutic and diagnostic procedures (30). Estimates of unit  
323 costs will be based on Dutch reference data from the cost guide of the Dutch Health Council (31). If  
324 this guide is an inappropriate determination of unit costs, the costs will be based on data provided by  
325 two hospital administrations (one university center and one general hospital) to account for the actual  
326 input of personnel, material and overhead over hospital resources used. Cost calculations will be used  
327 to determine cost of interventions (surgical, endoscopic or radiological) and diagnostic imaging. The  
328 cost analysis will be reported separately from the main study manuscript.

329

### 330 Patient and public involvement

331 The patient advocacy organization '*Alveeskliervereniging Nederland*' was involved in the design of the  
332 PICUS study. The experience of the patient advocacy organization with IAP and participation in  
333 scientific research has driven the research question and design of the study with regards to patient  
334 burden. The patient advocacy organization will also be involved in the dissemination and  
335 implementation of the study results.

336 All patients eligible for participation will be asked to give written informed consent.

337

338

### 339 Ethics and dissemination

340 The PICUS study is conducted according to the principles of the Declaration of Helsinki (October 2013)  
341 and to the Guideline for Good Clinical Practice by the International Council for Harmonization  
342 (November 9 2016).

1  
2  
3 343 The need for ethical approval was waived by the Medical Ethics Review Committee of the  
4  
5 344 Academic Medical Center on May 28, 2018 (W18\_161 # 18.199), by the Medical Research Ethics  
6  
7 345 Committee of the University Medical Center Utrecht on July 04, 2018 (18-469), by the Research Ethics  
8  
9 346 Committee of Radboud university medical center on July 23, 2018 (2018-4520), by the Medical Ethics  
10  
11 347 Review Committee of the Erasmus Medical Center on July 30, 2018 (MEC-2018-1293) and by the  
12  
13 348 Medical Ethics Review Committee of the Maastricht University Medical Center on September 7, 2018  
14  
15 349 (2018-0685). Before start of inclusion, local board approval will be obtained in all participating centers.  
16  
17  
18

19 350 The results of the PICUS study will be submitted for publication in an international peer-  
20  
21 351 reviewed scientific journal, regardless of study outcomes.  
22  
23  
24  
25 352  
26  
27  
28 353  
29

## 30 354 Discussion

31  
32  
33 355 Previous research has suggested that EUS might be beneficial in the detection of an etiology in  
34  
35 356 presumed IAP. However, data lacks on the efficacy of routine EUS in patients with a first episode of  
36  
37 357 presumed IAP, after repeat imaging after clinical recovery is negative for an etiology. The PICUS study  
38  
39 358 aims to determine whether routine EUS is warranted in a first episode of acute pancreatitis where no  
40  
41 359 cause could be uncovered after complete standard diagnostic work-up.  
42  
43  
44

45 360 Currently, guidelines do not clearly define criteria for biliary origin (11). However, it is generally  
46  
47 361 agreed upon that cholelithiasis, microlithiasis or biliary sludge constitute biliary etiology. Several  
48  
49 362 previous studies have shown an association between elevated ALT levels and acute biliary pancreatitis  
50  
51 363 (32-35), with a positive predictive value of 85% for an ALT > 150 U/L within 48 hours after onset of  
52  
53 364 symptoms (11, 32, 33, 35). Therefore, an elevated blood serum ALT level at admission is considered to  
54  
55 365 entail a high probability of biliary etiology, and pancreatitis with an elevated ALT is treated as being of  
56  
57 366 biliary origin (32-34, 36). However, the majority of current literature on EUS did not exclude patients  
58  
59  
60

1  
2  
3 367 based on ALT level at admission (15, 25, 26, 32, 37-46). As these patients have a higher a priori chance  
4  
5 368 of confirmation of biliary etiology on EUS, the etiology detection rate of EUS might be overestimated  
6  
7 369 in these studies. In PICUS, biliary etiology is defined as either the signs of cholelithiasis, microlithiasis  
8  
9  
10 370 or biliary sludge on transabdominal ultrasonography, or transient elevation of the blood serum ALT  
11  
12 371 level of more than twice the upper limit of normal at admission in the absence of ALT elevating  
13  
14 372 comorbidity. By only including patients with normal or slightly elevated ALT levels at admission, the  
15  
16 373 etiology detection rate as reported in PICUS will reflect the detection rate in patients who are truly  
17  
18 374 considered as having presumed IAP after standard diagnostic work-up.

21 375 Multiple definitions for IAP are maintained in literature (47). For PICUS, the definition provided  
22  
23 376 by the IAP/APA evidence-based guidelines on management of acute pancreatitis was used (11). These  
24  
25 377 guidelines advise a repeat transabdominal ultrasound after clinical recovery in the work-up of  
26  
27 378 presumed IAP because the index transabdominal ultrasound is less sensitive during the acute phase of  
28  
29 379 pancreatitis. The subpar visualization of gall bladder, bile ducts and pancreas is often due to excessive  
30  
31 380 amounts of air in the intestines caused by pancreatitis-induced ileus and/or suboptimal cooperation  
32  
33 381 of painful patients (48). After the first episode of acute pancreatitis, repeating a transabdominal  
34  
35 382 ultrasound may be able to detect biliary stones where it could not during index admission (49). Of the  
36  
37 383 current literature on EUS in IAP, however, only a minority of studies included repeat imaging in the  
38  
39 384 diagnostic work-up before EUS (15, 40, 41, 43). Previous research has shown that a repeat  
40  
41 385 transabdominal ultrasound has a diagnostic yield of 20% in patients with a first episode of IAP (13).  
42  
43 386 Omitting repeat imaging from diagnostic work-up before EUS may lead to an overestimation of the  
44  
45 387 diagnostic yield of EUS. In PICUS, all patients are required to undergo imaging after clinical recovery,  
46  
47 388 i.e. transabdominal ultrasound or MRI/MRCP. Computed tomography (CT) is not considered sufficient  
48  
49 389 imaging as biliary disease, the most common underlying etiology in presumed IAP, cannot always be  
50  
51 390 adequately detected using CT.  
52  
53  
54  
55  
56  
57  
58  
59  
60

1  
2  
3 391 It is well documented that the overall diagnostic yield of EUS in patients with recurrent  
4  
5 392 pancreatitis is superior to the diagnostic yield of both secretin-enhanced MRCP (s-MRCP) and non-  
6  
7 393 secretin-enhanced MRCP (18, 44, 46, 50). In the subgroup of patients with a pancreas divisum,  
8  
9 394 however, s-MRCP is considered to be superior in diagnostic yield to both EUS and MRCP (18). The role  
10  
11 395 of pancreas divisum in the etiology of pancreatitis is unclear. Epidemiological studies have shown that  
12  
13 396 the prevalence of pancreas divisum in the general population is equal to the prevalence in patients  
14  
15 397 with presumed IAP (23). In patients with a pancreas divisum and acute pancreatitis, potentially other  
16  
17 398 disease modifying factors add to the occurrence of pancreatitis, such as increased sensitivity to toxins  
18  
19 399 or genetic susceptibility. Because of this ambiguity, pancreas divisum in patients with a first episode  
20  
21 400 of acute pancreatitis is mostly left untreated in clinical practice. However, if patients with a pancreas  
22  
23 401 divisum present with multiple episodes of presumed IAP, the divisum is often considered to be related  
24  
25 402 to the pancreatitis and is subsequently treated, often with ERCP with endoscopic sphincterotomy,  
26  
27 403 although evidence supporting this practice is limited (23). Because of both the diagnostic superiority  
28  
29 404 of EUS in recurrent pancreatitis as well as the lack of clinical consequences of (s-)MRCP in patients with  
30  
31 405 a first episode of pancreatitis, EUS is preferred to (s-)MRCP as the first choice for additional diagnostic  
32  
33 406 testing for etiology in patients with presumed IAP (18, 44, 46, 50). Subsequently, current guidelines  
34  
35 407 advise performing MRCP in case of recurrent IAP after EUS fails to determine an etiology (11).  
36  
37 408 Therefore, in PICUS, we have chosen not to systematically include (s-)MRCP in the diagnostic work-up  
38  
39 409 before EUS of first episode IAP.

40  
41  
42  
43  
44  
45  
46 410 Current guidelines advise consideration of EUS after a first or second attack of IAP (11).  
47  
48 411 However, there is a paucity of evidence on the efficacy of EUS in first episode IAP. Three previous  
49  
50 412 studies prospectively reported on EUS in patients with first episode IAP (25, 26, 38). However, in these  
51  
52 413 studies, patients were not excluded based on liver enzymes abnormalities suggestive of biliary disease  
53  
54 414 and no repeat imaging after clinical recovery was performed. PICUS will be the first prospective cohort  
55  
56 415 study in which EUS will be performed in patients with a first episode of IAP after complete standard  
57  
58 416 diagnostic work-up before EUS according to current guidelines (11).  
59  
60

1  
2  
3 417 A diagnostic yield of 10% for any etiology will be considered reasonable to justify incorporating  
4  
5 418 routine EUS after a first episode of presumed IAP. This cut-off value was determined during a  
6  
7 419 multidisciplinary meeting of the Dutch Pancreatitis Study Group, which included the principal  
8  
9 420 investigators of several trials being executed by the Dutch Pancreatitis Study Group. Considering the  
10  
11 421 expectation that the majority of uncovered etiologies by EUS will be treatable (e.g. biliary disease) and  
12  
13 422 adequate treatment could prevent pancreatitis recurrence, while in a minority of uncovered etiologies  
14  
15 423 diagnosis before progression of disease might be crucial for prognosis (e.g. malignancy), a positive  
16  
17 424 result in 10% of patients was deemed sufficient to warrant routine EUS after a first episode of  
18  
19 425 presumed IAP.  
20  
21  
22  
23

24 426 In conclusion, the PICUS study is the first prospective cohort study of patients with a single  
25  
26 427 episode of presumed IAP after complete standard diagnostic work-up (including exclusion based on  
27  
28 428 blood serum ALT and imaging after clinical recovery). The results of the PICUS study will establish  
29  
30 429 whether routine EUS should be incorporated in the guidelines for standard diagnostic work-up after a  
31  
32 430 first episode of presumed IAP.  
33  
34  
35

36 431

37  
38  
39 432

## 40 41 42 433 Acknowledgements

43  
44 434 The authors would like to acknowledge:

- 45  
46  
47 435 1. all of the members of the Dutch Pancreatitis Study Group, for their continuous efforts in  
48  
49 436 recruitment of patients,  
50  
51 437 2. dr. S. van Dieren, for providing her expertise in the calculation of the sample size,  
52  
53 438 3. dr. M. van der Vlugt, MD, PhD, for her willingness to act as independent physician for the PICUS  
54  
55 439 study, and  
56  
57  
58  
59  
60

- 1  
2  
3 440 4. the pancreatic disease patient advocacy organization *Alvleeskliervereniging Nederland*, for  
4  
5 441 their effort in representing the perspective of (participating) patients during the study design.  
6  
7

8 442  
9

10  
11 443 **References**  
12

- 13  
14 444 1. Nesvaderani M, Eslick GD, Vagg D, Faraj S, Cox MR. Epidemiology, aetiology and outcomes of  
15 445 acute pancreatitis: A retrospective cohort study. *Int J Surg*. 2015;23(Pt A):68-74.  
16 446 2. van Brunschot S, van Grinsven J, van Santvoort HC, Bakker OJ, Besselink MG, Boermeester MA,  
17 447 et al. Endoscopic or surgical step-up approach for infected necrotising pancreatitis: a multicentre  
18 448 randomised trial. *The Lancet*. 2018;391(10115):51-8.  
19 449 3. Bakker OJ, van Brunschot S, van Santvoort HC, Besselink MG, Bollen TL, Boermeester MA, et  
20 450 al. Early versus on-demand nasoenteric tube feeding in acute pancreatitis. *N Engl J Med*.  
21 451 2014;371(21):1983-93.  
22 452 4. Besselink MGH, van Santvoort HC, Buskens E, Boermeester MA, van Goor H, Timmerman HM,  
23 453 et al. Probiotic prophylaxis in predicted severe acute pancreatitis: a randomised, double-blind,  
24 454 placebo-controlled trial. *The Lancet*. 2008;371(9613):651-9.  
25 455 5. Bakker OJ, van Santvoort HC, van Brunschot S, Geskus RB, Besselink MG, Bollen TL, et al.  
26 456 Endoscopic Transgastric vs Surgical Necrosectomy for Infected Necrotizing Pancreatitis A Randomized  
27 457 Trial. *JAMA*. 2012;307(10):1053-61.  
28 458 6. Van Santvoort HC, Besselink MG, Bakker OJ, Hofker HS, Boermeester MA, de Jong CH, et al. A  
29 459 Step-up Approach or Open Necrosectomy for Necrotizing Pancreatitis. *N Engl J Med*. 2010;362:1491-  
30 460 502.  
31 461 7. Sadr-Azodi O, Oskarsson V, Discacciati A, Videhult P, Askling J, Ekblom A. Pancreatic Cancer  
32 462 Following Acute Pancreatitis: A Population-based Matched Cohort Study. *Am J Gastroenterol*.  
33 463 2018;113(11):1711-9.  
34 464 8. Zheng Y, Zhou Z, Li H, Li J, Li A, Ma B, et al. A Multicenter Study on Etiology of Acute Pancreatitis  
35 465 in Beijing During 5 Years. *Pancreas*. 2015;44(3):409-14.  
36 466 9. Zhu Y, Pan X, Zeng H, He W, Xia L, Liu P, et al. A Study on the Etiology, Severity, and Mortality  
37 467 of 3260 Patients With Acute Pancreatitis According to the Revised Atlanta Classification in Jiangxi,  
38 468 China Over an 8-Year Period. *Pancreas*. 2017;46(4):504-9.  
39 469 10. Roberts SE, Morrison-Rees S, John A, Williams JG, Brown TH, Samuel DG. The incidence and  
40 470 aetiology of acute pancreatitis across Europe. *Pancreatol*. 2017;17(2):155-65.  
41 471 11. Working Group IAP/APA Acute Pancreatitis Guidelines. IAP/APA evidence-based guidelines for  
42 472 the management of acute pancreatitis. *Pancreatol*. 2013;13(4 Suppl 2):e1-15.  
43 473 12. UK Working Party on Acute Pancreatitis. UK guidelines for the management of acute  
44 474 pancreatitis. *Gut*. 2005;54 Suppl 3:iii1-9.  
45 475 13. Hallensleben ND, Umans DS, Bouwense SA, Verdonk RC, Romkens TE, Witteman BJ, et al. The  
46 476 diagnostic work-up and outcomes of 'presumed' idiopathic acute pancreatitis: A post-hoc analysis of a  
47 477 multicentre observational cohort. *United European Gastroenterol J*. 2020;8(3):340-50.  
48 478 14. Lee SP, Nicholls JF, Park HZ. Biliary Sludge as a Cause of Acute Pancreatitis. *N Engl J Med*.  
49 479 1992;326:589-93.  
50 480 15. Garg PK, Tandon RK, Madan K. Is biliary microlithiasis a significant cause of idiopathic recurrent  
51 481 acute pancreatitis? A long-term follow-up study. *Clin Gastroenterol Hepatol*. 2007;5(1):75-9.  
52 482 16. Tenner S, Baillie J, DeWitt J, Vege SS, American College of G. American College of  
53 483 Gastroenterology guideline: management of acute pancreatitis. *Am J Gastroenterol*.  
54 484 2013;108(9):1400-15; 16.  
55  
56  
57  
58  
59  
60



- 1  
2  
3 485 17. Banks PA, Freeman ML, Practice Parameters Committee of the American College of G. Practice  
4 486 guidelines in acute pancreatitis. *Am J Gastroenterol*. 2006;101(10):2379-400.
- 5 487 18. Wan J, Ouyang Y, Yu C, Yang X, Xia L, Lu N. Comparison of EUS with MRCP in idiopathic acute  
6 488 pancreatitis: a systematic review and meta-analysis. *Gastrointest Endosc*. 2018.
- 7 489 19. Schünemann H BJ, Guyatt G, Oxman A, editors. GRADE handbook for grading quality of  
8 490 evidence and strength of recommendations. Group TGW, editor 2013.
- 9 491 20. Banks PA, Bollen TL, Dervenis C, Gooszen HG, Johnson CD, Sarr MG, et al. Classification of acute  
10 492 pancreatitis--2012: revision of the Atlanta classification and definitions by international consensus.  
11 493 *Gut*. 2013;62(1):102-11.
- 12 494 21. Schneider A, Lohr JM, Singer MV. The M-ANNHEIM classification of chronic pancreatitis:  
13 495 introduction of a unifying classification system based on a review of previous classifications of the  
14 496 disease. *J Gastroenterol*. 2007;42(2):101-19.
- 15 497 22. Hawes RH, Fockens P. Endosonography. Second edition ed. Philadelphia: Elsevier Inc.; 2011.
- 16 498 23. DiMagno MJ, Wamsteker EJ. Pancreas divisum. *Curr Gastroenterol Rep*. 2011;13(2):150-6.
- 17 499 24. Dindo D, Demartines N, Clavien P-A. Classification of Surgical Complications. *Annals of Surgery*.  
20 500 2004;240(2):205-13.
- 21 501 25. Yusoff IF, Raymond G, Sahai AV. A prospective comparison of the yield of EUS in primary vs.  
22 502 recurrent idiopathic acute pancreatitis. *Gastrointest Endosc*. 2004;60(5):673-8.
- 23 503 26. Vila JJ, Vicuna M, Irisarri R, de la Higuera BG, Ruiz-Clavijo D, Rodriguez-Gutierrez C, et al.  
24 504 Diagnostic yield and reliability of endoscopic ultrasonography in patients with idiopathic acute  
25 505 pancreatitis. *Scand J Gastroenterol*. 2010;45(3):375-81.
- 26 506 27. Whitley E, Ball J. Statistics review 4: Sample size calculations. *Critical Care* 2002;6(4):335-41.
- 27 507 28. R-Core-Team. R: A Language and Environment for Statistical Computing. Vienna, Austria: The  
28 508 R Foundation for Statistical Computing; 2017.
- 29 509 29. Oliver MR, Yeghiazarian K, Zheng M, Jamshidian M, Koyfman I. nQuery Advisor. 1995-2007.
- 30 510 30. Gold MR, Siegel JE, Russel LB. Cost-effectiveness in Health and Medicine. New York: Oxford  
31 511 University Press; 1996.
- 32 512 31. Zorginstituut Nederland (Health Institute Netherlands). Kostenhandleiding: Methodologie van  
33 513 kostenonderzoek en referentieprijzen voor economische evaluaties in de gezondheidszorg (Cost  
34 514 Guide: Methodology of cost analysis and reference prices for economical evaluations in health care)  
35 515 2015.
- 36 516 32. Liu CL, Fan ST, Lo CM, Tso WK, Wong Y, Poon RT, et al. Clinico-biochemical prediction of biliary  
37 517 cause of acute pancreatitis in the era of endoscopic ultrasonography. *Aliment Pharmacol Ther*.  
38 518 2005;22(5):423-31.
- 39 519 33. Moolla Z, Anderson F, Thomson SR. Use of amylase and alanine transaminase to predict acute  
40 520 gallstone pancreatitis in a population with high HIV prevalence. *World J Surg*. 2013;37(1):156-61.
- 41 521 34. Ammori BJ, Boreham B, Lewis P, Roberts SA. The Biochemical Detection of Biliary Etiology of  
42 522 Acute Pancreatitis on Admission: A Revisit in the Modern Era of Biliary Imaging. *Pancreas*.  
43 523 2003;26:e32-5.
- 44 524 35. Tenner SD, H.; Steinberg, W. Predicting gallstone pancreatitis with laboratory parameters: a  
45 525 meta-analysis. *Am J Gastroenterol*. 1994;89:1863-6.
- 46 526 36. Schepers NJ, Bakker OJ, Besselink MG, Bollen TL, Dijkgraaf MG, van Eijck CH, et al. Early biliary  
47 527 decompression versus conservative treatment in acute biliary pancreatitis (APEC trial): study protocol  
48 528 for a randomized controlled trial. *Trials*. 2016;17:5.
- 49 529 37. Frossard JL, Sosa-Valencia L, Amouyal G, Marty O, Hadengue A, Amouyal P. Usefulness of  
50 530 Endoscopic Ultrasonography in Patients with "Idiopathic" Acute Pancreatitis. *Am J Med*. 2000;109:196-  
51 531 200.
- 52 532 38. Govil A, Agrawal MK, Agrawal D, Udawat H. Role of endoscopic ultrasonography in patients  
53 533 with first episode of idiopathic acute pancreatitis. *Indian J Gastroenterol*. 2014;33(3):241-8.
- 54 534 39. Mariani A, Arcidiacono PG, Curioni S, Giussani A, Testoni PA. Diagnostic yield of ERCP and  
55 535 secretin-enhanced MRCP and EUS in patients with acute recurrent pancreatitis of unknown aetiology.  
56 536 *Dig Liver Dis*. 2009;41(10):753-8.



- 1  
2  
3 537 40. Morris-Stiff G, Al-Allak A, Frost B, Lewis WG, Puntis MC, Roberts A. Does Endoscopic Ultrasound  
4 538 Have Anything to Offer in the Diagnosis of Idiopathic Acute Pancreatitis? JOP. 2009;10(2):143-6.
- 5 539 41. Norton SA, Alderson D. Endoscopic ultrasonography in the evaluation of idiopathic acute  
6 540 pancreatitis British Journal of Surgery. 2000;97:1650-5.
- 7 541 42. Queneau P-E, Zeeh S, Lapeyre V, Thibault P, Heyd B, Carayon P, et al. Feasibility of and Interest  
8 542 in Combined Endoscopic Ultrasonography and Biliary Drainage in Unexplained Acute Biliopancreatic  
9 543 Disorders. Dig Dis Sci. 2002;47(9):2020-4.
- 11 544 43. Rana SS, Bhasin DK, Rao C, Singh K. Role of endoscopic ultrasound in idiopathic acute  
12 545 pancreatitis with negative ultrasound, computed tomography, and magnetic resonance  
13 546 cholangiopancreatography. Ann Gastroenterol. 2012;25(2):133-7.
- 14 547 44. Repiso Ortega A, Gómez-Rodríguez R, Romero M, Fernández-Zapardiel S, del Mar Céspedes M,  
15 548 Carrobes J-M. Prospective Comparison of Endoscopic Ultrasonography and Magnetic Resonance  
16 549 Cholangiopancreatography in the Etiological Diagnosis of "Idiopathic" Acute Pancreatitis. Pancreas.  
17 550 2011;40:289-94.
- 19 551 45. Tandon M, Topazian M. Endoscopic Ultrasound in Idiopathic Acute Pancreatitis. Am J  
20 552 Gastroenterol. 2001;96(3):705-9.
- 21 553 46. Thevenot A, Bournet B, Otal P, Canevet G, Moreau J, Buscaïl L. Endoscopic ultrasound and  
22 554 magnetic resonance cholangiopancreatography in patients with idiopathic acute pancreatitis. Dig Dis  
23 555 Sci. 2013;58(8):2361-8.
- 24 556 47. Somani P, Sunkara T, Sharma M. Role of endoscopic ultrasound in idiopathic pancreatitis.  
25 557 World J Gastroenterol. 2017;23(38):6952-61.
- 27 558 48. Lara LF, Levy MJ. Idiopathic Recurrent Acute Pancreatitis. MedGenMed. 2004;6(4):10.
- 28 559 49. Signoretti M, Baccini F, Piciocchi M, Iannicelli E, Valente R, Zerboni G, et al. Repeated  
29 560 Transabdominal Ultrasonography Is a Simple and Accurate Strategy to Diagnose a Biliary Etiology of  
30 561 Acute Pancreatitis. Pancreas. 2014;43(7):1106-10.
- 31 562 50. Meeralam Y, Al-Shammari K, Yaghoobi M. Diagnostic accuracy of EUS compared with MRCP in  
32 563 detecting choledocholithiasis: a meta-analysis of diagnostic test accuracy in head-to-head studies.  
33 564 Gastrointest Endosc. 2017;86(6):986-93.
- 34 565 51. Stolle M, Sack PM, Thomasius R. Binge drinking in childhood and adolescence: epidemiology,  
35 566 consequences, and interventions. Dtsch Arztebl Int. 2009;106(19):323-8.
- 37 567 52. Sadr Azodi O, Orsini N, Andren-Sandberg A, Wolk A. Effect of type of alcoholic beverage in  
38 568 causing acute pancreatitis. Br J Surg. 2011;98(11):1609-16.
- 39 569 53. Midanik LT. Drunkenness, feeling the effects and 5+ measures. Addiction. 1999;94(6):887- 97.
- 40 570 54. Ratjen F, Döring G. Cystic fibrosis. The Lancet. 2003;361(9358):681-9.
- 41 571 55. Spanier B, Bruno MJ, Dijkgraaf MG. Incidence and mortality of acute and chronic pancreatitis  
42 572 in the Netherlands: a nationwide record-linked cohort study for the years 1995-2005. World J  
43 573 Gastroenterol. 2013;19(20):3018-26.
- 44 574 56. CBS StatLine. Households; size, position in household, January 1st 1995-2013 StatLine: Central  
45 575 Bureau for Statistics 2015 [Available from:  
46 576 [http://statline.cbs.nl/Statweb/publication/?VW=T&DM=SLNL&PA=37312&D1=a&D2=0,5,10,\(I-2\)-I&HD=180221-1109&HDR=G1&STB=T](http://statline.cbs.nl/Statweb/publication/?VW=T&DM=SLNL&PA=37312&D1=a&D2=0,5,10,(I-2)-I&HD=180221-1109&HDR=G1&STB=T).  
47 577
- 49 578 57. Whitcomb DC. Genetic aspects of pancreatitis. Annu Rev Med. 2010;61:413-24.
- 50 579 58. Whitcomb DC. Hereditary diseases of the pancreas. In: Yamada T AD, Kaplowitz N, Laine L,  
51 580 Owyang C, Powell DW, editors, editor. Textbook of Gastroenterology. 4th ed. Philadelphia: Lippincott  
52 581 Williams & Wilkins; 2003. p. 2147-65.
- 53 582 59. Shane E, Dinaz I. Hypercalcemia: Pathogenesis, clinical manifestations, differential diagnosis  
54 583 and management. In: Favus M, editor. Primer on the metabolic bone diseases and disorders of mineral  
55 584 metabolism. 6th ed. Philadelphia: Lippincott, Williams, and Wilkins; 2006. p. 26-176.
- 57 585 60. Berglund L, Brunzell JD, Goldberg AC, Goldberg IJ, Sacks F, Murad MH, et al. Evaluation and  
58 586 treatment of hypertriglyceridemia: an Endocrine Society clinical practice guideline. J Clin Endocrinol  
59 587 Metab. 2012;97(9):2969-89.

- 1  
2  
3 588 61. Nitsche C, Maertin S, Scheiber J, Ritter CA, Lerch MM, Mayerle J. Drug-induced pancreatitis.  
4 589 Curr Gastroenterol Rep. 2012;14(2):131-8.  
5 590 62. Lankisch PG, Apte M, Banks PA. Acute pancreatitis. The Lancet. 2015;386(9988):85-96.  
6 591 63. Tummala P, Tariq SH, Chibnall JT, Agarwal B. Clinical Predictors of Pancreatic Carcinoma  
7 592 Causing Acute Pancreatitis. Pancreas. 2013;42(1):108-13.  
8 593 64. Cotton PB, Lehman G, Vennes J, Geenen JE, Russell RCG, Meyers WC, et al. Endoscopic  
9 594 sphincterotomy complications and their management: an attempt at consensus. Gastrointest Endosc.  
10 595 1991;37:383-93.  
11 596 65. Connor S. Defining post-operative pancreatitis as a new pancreatic specific complication  
12 597 following pancreatic resection. HPB (Oxford). 2016;18(8):642-51.  
13 598 66. Booth F, Flint L. Pancreatoduodenal trauma. In: ed BJ, editor. Blunt multiple trauma. New York:  
14 599 Marcel Dekker; 1990. p. 497-509.  
15 600 67. Smith I, Monkemuller K, Wilcox CM. Incidentally Identified Common Bile Duct Dilatation. A  
16 601 Systematic Review of Evaluation, Causes, and Outcome. J Clin Gastroenterol. 2015;49:810-5.  
17 602 68. Mortelé KJ, Rocha TC, Streeter JL, Taylor AJ. Multimodality Imaging of Pancreatic and Biliary  
18 603 Congenital Anomalies. Radiographics. 2006;26(3):715-31.  
19  
20  
21  
22 604  
23  
24  
25 605  
26  
27  
28 606 Author Statement  
29  
30 607 Authors' contributions  
31  
32  
33 608 DSU drafted the manuscript. HCT, RCV, SAB, MGB and JEvH co-authored the writing of the manuscript.  
34  
35 609 DSU, RCV, SAB, MABo, MJB, PF, EJMvG, JWP, HCvS, FPV, MGB and JEvH were involved in the design of  
36  
37 610 the study during several meetings of the Dutch Pancreatitis Study Group. NDHL, MPGFA, AB, RAB,  
38  
39 611 MABr, LH, WLC, HMvD, BCvE, GWE, WLH, CVH, AI, LMK, SDK, LEP, RQ, TEHR, ACITLT, AYT, NGV, AMCJV,  
40  
41 612 RLJvW and BJW critically assessed the study design, during several meetings, and edited the  
42  
43 613 manuscript. All authors read and approved the final manuscript.  
44  
45  
46  
47 614  
48  
49  
50 615 Funding statement  
51  
52 616 This work was supported by the Dutch Digestive Disease Foundation (*Maag Lever Darm Stichting*, grant  
53  
54 617 number D17-25). The PICUS study is an investigator-initiated study. The sponsor had no influence on  
55  
56 618 design, implementation and conduct of the study, as well as on collection, analysis and interpretation  
57  
58 619 of data, construction of the manuscript and decision to publish.  
59  
60

1  
2  
3 620  
4  
5

6 621 Competing interests statement

7  
8 622 The authors declare that they have no competing interests.  
9

10  
11 623  
12

13  
14 624 Data Availability Statement

15  
16  
17 625 The datasets used and/or analyzed during the current study are available from the corresponding  
18  
19 626 author on reasonable request.  
20

21  
22 627  
23

24  
25 628  
26

27  
28 629 Figure legend

29  
30 630 Figure 1: Overview of screening and study procedures. MRI = magnetic resonance imaging. MRCP =  
31  
32 631 magnetic resonance cholangiopancreatography. CRF = Case Report Form. EUS = endoscopic  
33  
34 632 ultrasonography.  
35  
36

37  
38 633  
39

40  
41 634  
42

43  
44 635  
45

46  
47 636  
48

49  
50 637  
51

52  
53 638  
54

55  
56 639  
57  
58  
59  
60

640 Table 1

| <b>Standard diagnostic work-up</b>                                   |                                                                            |
|----------------------------------------------------------------------|----------------------------------------------------------------------------|
| <i>Detailed personal and family history, including questions on:</i> | Alcohol use                                                                |
|                                                                      | Recent ERCP                                                                |
|                                                                      | Recent start or changes in use of drugs associated with acute pancreatitis |
|                                                                      | Recent major abdominal trauma                                              |
|                                                                      | Recent abdominal surgery                                                   |
|                                                                      | Familial and hereditary pancreatitis                                       |
|                                                                      | Cystic fibrosis-related pancreatitis                                       |
| <i>Laboratory tests, including:</i>                                  | Blood serum triglycerides level                                            |
|                                                                      | Blood serum calcium level, corrected for the blood serum albumin level     |
|                                                                      | Blood serum ALT level on admission                                         |
| <i>Imaging:</i>                                                      | Transabdominal ultrasound, MRI or MRCP after clinical recovery             |

641 **Table 1: Standard diagnostic work-up** Standard diagnostic work-up according to the 2013 IAP/APA evidence-based guideline  
 642 on management of acute pancreatitis. A listing of the drugs considered to be associated with acute pancreatitis are listed in  
 643 additional file 1. ERCP = endoscopic retrograde cholangiopancreatography; ALT = alanine aminotransferase; MRI = magnetic  
 644 resonance imaging; MRCP = magnetic resonance cholangiopancreatography.

645

646

647

648

649

650

651 Table 2

| Etiology             | Definition                                                                                                                                                                                                                                                                                                                                                                                                                                |
|----------------------|-------------------------------------------------------------------------------------------------------------------------------------------------------------------------------------------------------------------------------------------------------------------------------------------------------------------------------------------------------------------------------------------------------------------------------------------|
| Alcohol              | > 4 units of alcohol in the 24 hours prior to start of abdominal complaints (51-53)                                                                                                                                                                                                                                                                                                                                                       |
| Biliary disease      | <ol style="list-style-type: none"> <li>1. A transient elevated ALT level of &gt;2 times the upper limit of normal at diagnosis of acute pancreatitis, in the absence of other ALT elevating comorbidity (34), OR</li> <li>2. Gallstones, microlithiasis and/or biliary sludge, OR</li> <li>3. A dilated CBD of &gt;8 mm in patients &lt;76 years or &gt;10 mm in patients &gt;75 years at diagnosis of acute pancreatitis (36)</li> </ol> |
| Cystic fibrosis      | history of cystic fibrosis in the absence of another origin (54)                                                                                                                                                                                                                                                                                                                                                                          |
| Familial             | two or more direct blood-related family members (parents, children or siblings) who have had an episode of acute pancreatitis (55-57)                                                                                                                                                                                                                                                                                                     |
| Hereditary           | mutation in the PRSS1, SPINK1, CFTR, CTSC, CLDN2 or CPA1 gene, or direct family member (parents, children, siblings) with one or more of the above mentioned mutations and at least one direct family member who has (had) acute or chronic pancreatitis (57, 58)                                                                                                                                                                         |
| Hypercalcemia        | blood serum calcium level $\geq 12$ mg/dl (3 mmol/l), corrected for serum albumin level, as first measured during admission (59)                                                                                                                                                                                                                                                                                                          |
| Hypertriglyceridemia | blood serum triglyceride level of $\geq 1000$ mg/dl (11.2 mmol/l) under fasting conditions, as first measured during admission (60)                                                                                                                                                                                                                                                                                                       |
| Medication           | use of drug(s) listed in additional file 1, which has or have been started or increased in dosage within a reasonable temporal sequence, in principle 1                                                                                                                                                                                                                                                                                   |

|          |                                                                                                                                              |
|----------|----------------------------------------------------------------------------------------------------------------------------------------------|
|          | month before onset of pancreatitis, and has or have a positive dechallenge (a drug reaction that is confirmed by stopping the drug) (61, 62) |
| Neoplasm | Known hepatopancreatobiliary malignancy or known malignancy with metastases causing obstruction of the pancreatic duct (63)                  |
| ERCP     | ERCP within 24 hours before diagnosis of pancreatitis (64)                                                                                   |
| Surgical | abdominal surgery within 24 hours prior to diagnosis of pancreatitis (65)                                                                    |
| Trauma   | typical blunt trauma to the upper abdomen and pancreatic trauma visible on imaging (66)                                                      |

652 **Table 2: potential etiologies and their definitions** Potential etiologies and their definitions. Side branch or mixed type  
653 *intraductal papillary mucinous neoplasms without dilatation of the pancreatic duct and pancreas divisum will not be*  
654 *considered to be a causative factor for the pancreatitis episode. If imaging is not able to discriminate between gall bladder*  
655 *polyps or concrements, lesions smaller than 10 mm will not be considered an exclusion criterion. Lesions above 10 mm,*  
656 *irrespective of whether they are a polyp or a concrement, are an immediate indication for cholecystectomy, and these patients*  
657 *will be excluded from PICUS. ALT = alanine transaminase. CBD = common bile duct. ERCP = endoscopic retrograde*  
658 *cholangiopancreatography.*

659

660

661

662

663

664

665

666 Table 3

|                             |                                                                                                                                                                                                                                                                                                                                                                                                                                                                                                                                                                                      |
|-----------------------------|--------------------------------------------------------------------------------------------------------------------------------------------------------------------------------------------------------------------------------------------------------------------------------------------------------------------------------------------------------------------------------------------------------------------------------------------------------------------------------------------------------------------------------------------------------------------------------------|
| <i>Biliary pancreatitis</i> | Presence of biliary stones, microlithiasis, or sludge                                                                                                                                                                                                                                                                                                                                                                                                                                                                                                                                |
|                             | Widened CBD, >8 mm in patients <76 years, or >10 mm in patients >75 years, in the absence of other CBD dilating factors (e.g. opioid use, distal stenosis, obstruction of external compression of CBD or papilla (67))                                                                                                                                                                                                                                                                                                                                                               |
| <i>Chronic pancreatitis</i> | Pancreatic calcifications                                                                                                                                                                                                                                                                                                                                                                                                                                                                                                                                                            |
|                             | > 4 of the following abnormal features of the pancreas:<br><ol style="list-style-type: none"> <li>1. Enlarged gland size</li> <li>2. Cysts</li> <li>3. Echo-poor lesions (focal areas of reduced echogenicity)</li> <li>4. Echo-rich lesions (&gt; 3 mm in diameter)</li> <li>5. Accentuation of lobular pattern</li> <li>6. Increased duct wall echogenicity</li> <li>7. Irregularity of the main pancreatic duct</li> <li>8. Dilation of the main pancreatic duct &gt; 3.5 mm (68)</li> <li>9. Visible side branches</li> <li>10. Calcifications of the pancreatic duct</li> </ol> |
| <i>Neoplasms</i>            | Definitive diagnosis of pathological tissue after histological or cytological evaluation of specimen of an anomaly observed during EUS, e.g. hyperplastic or malignant tissue, or auto-immune inflammatory disease                                                                                                                                                                                                                                                                                                                                                                   |
|                             | Main duct IPMN or mixed type IPMN causing dilatation of the pancreatic duct                                                                                                                                                                                                                                                                                                                                                                                                                                                                                                          |

667 **Table 3: positive imaging** Definition of positive imaging. For each diagnosis, presence of one of the separately mentioned  
 668 abnormalities is required to be considered as positive imaging. Specimen is not required to be obtained during EUS. Anatomical  
 669 anomalies (e.g. divisum) are not considered a certain etiology in first episode IAP and therefore not considered as positive  
 670 imaging. CBD = common bile duct. EUS = endoscopic ultrasonography. IPMN = intraductal papillary mucinous neoplasm.

671

1  
2  
3  
4  
5  
6  
7  
8  
9  
10  
11  
12  
13  
14  
15  
16  
17  
18  
19  
20  
21  
22  
23  
24  
25  
26  
27  
28  
29  
30  
31  
32  
33  
34  
35  
36  
37  
38  
39  
40  
41  
42  
43  
44  
45  
46  
47  
48  
49  
50  
51  
52  
53  
54  
55  
56  
57  
58  
59  
60

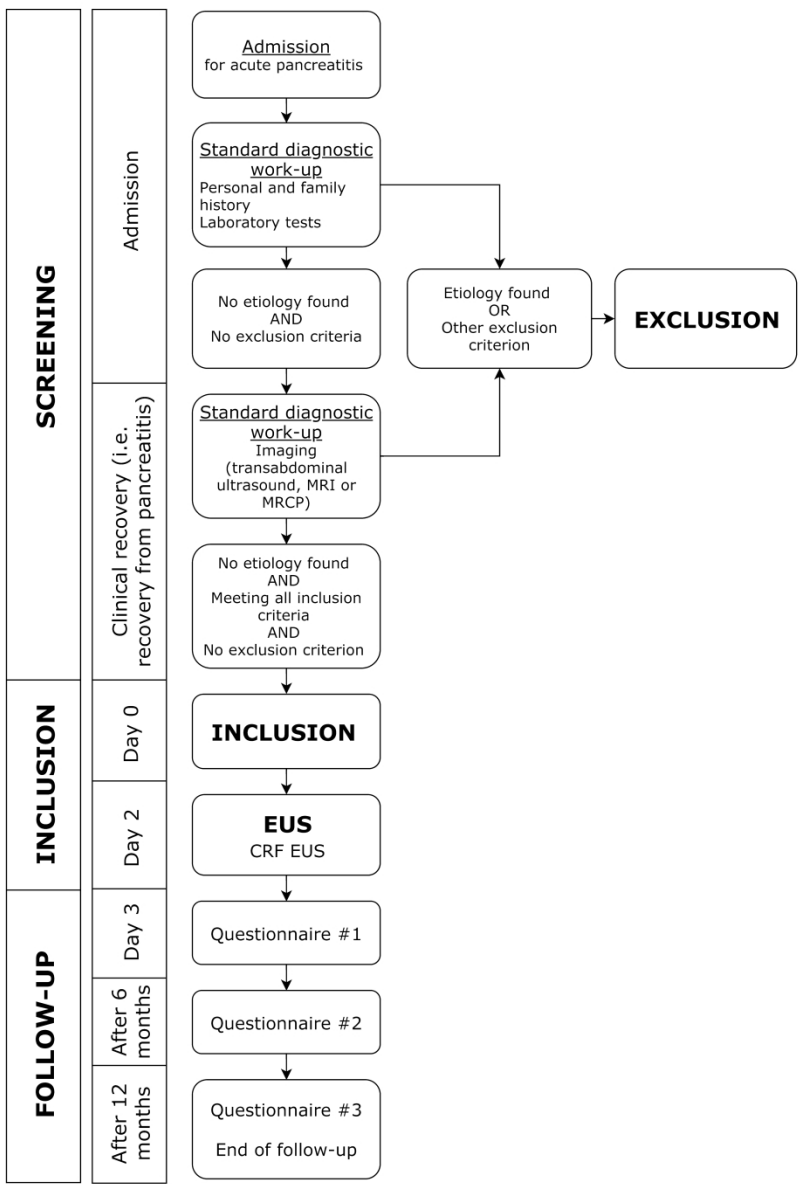

Overview of screening and study procedures. MRI = magnetic resonance imaging. MRCP = magnetic resonance cholangiopancreatography. CRF = Case Report Form. EUS = endoscopic ultrasonography.

105x154mm (1200 x 1200 DPI)



## Additional file 1: Table S1 Drugs associated with acute pancreatitis

| Drugs associated with acute pancreatitis |              |                     |                 |                                |
|------------------------------------------|--------------|---------------------|-----------------|--------------------------------|
| Acetaminophen                            | Cisplatin    | Hydrochlorothiazide | Methyldopa      | Pentavalent antimony compounds |
| Asparaginase                             | Cytarabine   | Interferon alpha    | Metronidazole   |                                |
| Azathioprine                             | Didanosine   | Itraconazole        | Octreotide      | Phenformin                     |
| Bortezomib                               | Enalapril    | Lamivudine          | Olanzapine      | Simvastatin                    |
| Capecitabine                             | Erythromycin | Mercaptopurine      | Opiates         | Steroids                       |
| Carbamazepine                            | Estrogens    | Mesalazine          | Oxyphenbutazone | Sulfasalazine                  |
| Cimetidine                               | Furosemide   | Olsalazine          | Pentamidine     | co-trimoxazole                 |

*Drugs with a definite association with acute pancreatitis (1, 2)*

### References

1. Nitsche C, Maertin S, Scheiber J, Ritter CA, Lerch MM, Mayerle J. Drug-induced pancreatitis. *Curr Gastroenterol Rep.* 2012;14(2):131-8.
2. Lankisch PG, Apte M, Banks PA. Acute pancreatitis. *The Lancet.* 2015;386(9988):85-96.

## 1 Additional file 2: Relevant definitions

2 Acute pancreatitis: an acute inflammation of the pancreatic parenchyma, diagnosed when at least two  
3 of the three following characteristics are present (1):

- 4 1. Clinical features of acute pancreatitis, such as upper abdominal pain
- 5 2. Elevated serum amylase or lipase levels of at least three times the upper limit of normal (ULN)
- 6 3. Signs of acute pancreatitis on imaging

7 Note: no value of the required serum amylase or lipase level is provided as every participating center  
8 has a local laboratory, which is why each center may use different normal range values.

9  
10 Idiopathic acute pancreatitis is considered to be present if no etiology is found in standard work-up,  
11 according to the IAP/APA evidence-based guidelines on management of acute pancreatitis (2), which  
12 comprises at least the following tests:

- 13 1. A detailed personal and family history, including questions on:
  - 14 a. Alcohol use
  - 15 b. Recent endoscopic retrograde cholangiopancreatography (ERCP)
  - 16 c. Recent start of or changes in use of drugs associated with acute pancreatitis
  - 17 d. Recent major abdominal trauma
  - 18 e. Recent abdominal surgery
  - 19 f. Familial pancreatitis
  - 20 g. Hereditary pancreatitis

1  
2  
3 21 h. Cystic fibrosis related pancreatitis  
4  
5

6 22 2. Laboratory tests, including:  
7  
8

9 23 a. Blood serum triglycerides level on admission  
10

11 24 b. Blood serum calcium level, corrected for the serum albumin level, on admission  
12  
13

14 25 c. Blood serum alanine transaminase (ALT) level on admission  
15  
16

17 26 3. Imaging via transabdominal ultrasound, magnetic resonance imaging (MRI) or magnetic  
18  
19  
20 27 resonance cholangiopancreatography (MRCP) after clinical recovery  
21  
22

23 28 Note: side branch or mixed type intraductal papillary mucinous neoplasms (IPMN) without dilatation  
24  
25 29 of the pancreatic duct will not be considered to be a causative factor for the pancreatitis episode.  
26  
27

28 30 Note: if the imaging is not able to discriminate between gall bladder polyps or concrements, lesions  
29  
30 31 smaller than 10 mm will not be considered an exclusion criterion. Lesions above 10 mm, irrespective  
31  
32 32 of whether they are a polyp or a concrement, are an immediate indication for cholecystectomy, and  
33  
34 33 will be excluded from PICUS.  
35  
36

37 34  
38  
39  
40 35 Alcoholic pancreatitis: pancreatitis caused by an excess intake of alcohol, diagnosed when biliary  
41  
42 36 etiology is not demonstrated by standard work-up and the patient has indicated (either by direct or  
43  
44 37 indirect personal history or by findings during physical examination) to have drunk at least five units of  
45  
46 38 alcohol in the 24 hours prior to start of abdominal complaints (or in asymptomatic acute pancreatitis:  
47  
48 39 prior to diagnosis) (3-5)  
49  
50

51  
52 40  
53  
54  
55 41  
56  
57  
58  
59  
60

1  
2  
3 42 Biliary pancreatitis: pancreatitis caused by biliary stones, microlithiasis or sludge, diagnosed when one  
4  
5 43 of the following features is present:

- 6  
7  
8 44 1. A transient elevated ALT level of more than two times the ULN at diagnosis of acute  
9  
10 45 pancreatitis, in the absence of ALT elevating comorbidity (6)  
11  
12  
13 46 2. Signs of presence of gallstones, microlithiasis or sludge on imaging, defined as follows:  
14  
15  
16 47 a. Gallstones, microlithiasis and/or biliary sludge, either in the gall bladder, ductus  
17  
18 48 cysticus, intrahepatic bile ducts or in the common bile duct (CBD), and/or  
19  
20  
21 49 b. A CBD of more than eight mm in patients 75 years old or younger or more than ten  
22  
23 50 mm in patients older than 75 years at diagnosis of acute pancreatitis (7)

24  
25  
26 51 Note: no value of the required serum ALT level is provided as the normal range values depend on the  
27  
28 52 sex of the patient and as every participating center has a local laboratory, which is why each center  
29  
30 53 may use different normal range values.  
31  
32  
33  
34 54

35  
36  
37 55 Chronic pancreatitis: a chronic inflammation of the pancreatic parenchyma, defined as typical clinical  
38  
39 56 history of chronic pancreatitis (such as recurrent pancreatitis or abdominal pain, except for primary  
40  
41 57 painless pancreatitis) and one or more of the following (8):

- 42  
43  
44 58 1. Pancreatic calcifications  
45  
46  
47 59 2. Moderate or marked ductal lesions, defined as two or more of the following abnormal features  
48  
49 60 on transabdominal ultrasound, computed tomography (CT) or MRI/MRCP, according to the  
50  
51 61 Cambridge classification (9):  
52  
53  
54 62 a. Main pancreatic duct abnormalities, either enlargement or increased echogenicity of  
55  
56 63 the duct wall (mandatory)  
57  
58  
59 64 b. Pancreatic enlargement  
60

- 1  
2  
3 65 c. Cavities  
4  
5
- 6 66 d. Duct irregularities including intraductal fillings defects, calculi or duct obstruction  
7  
8
- 9 67 e. Focal acute pancreatitis  
10  
11
- 12 68 f. Parenchymal heterogeneity  
13  
14
- 15 69 g. Irregularities of pancreatic head or body contour  
16  
17
- 18 70 3. Moderate or marked ductal lesions, defined as five or more of the following abnormal features  
19  
20 71 on endoscopic ultrasonography (EUS):  
21  
22
- 23 72 a. Enlarged gland size  
24  
25
- 26 73 b. Cysts  
27  
28
- 29 74 c. Echo-poor lesions (focal areas of reduced echogenicity)  
30  
31
- 32 75 d. Echo-rich lesions (more than three mm in diameter)  
33  
34
- 35 76 e. Accentuation of lobular pattern (e.g., echo-poor normal parenchyma surrounded by  
36  
37 77 hyperechoic strands)  
38  
39
- 40 78 f. Increased duct wall echogenicity  
41  
42
- 43 79 g. Irregularity of the main pancreatic duct (e.g., with narrowing of the duct)  
44  
45
- 46 80 h. Dilation of the main pancreatic duct  
47  
48
- 49 81 i. Visible side branches (e.g., with dilation)  
50  
51
- 52 82 j. Calcification (of the pancreatic duct)  
53  
54
- 55 83 4. Marked and persistent exocrine insufficiency defined as pancreatic steatorrhea markedly  
56  
57 84 reduced by enzyme supplementation  
58  
59
- 60 85 5. Typical histology of an adequate histological specimen

1  
2  
3 86 Note: during initial diagnostic work-up during admission 'marked and persistent exocrine insufficiency'  
4  
5 87 cannot be evaluated properly. Therefore this part of the definition of chronic pancreatitis will not be  
6  
7 88 applicable during standard work-up. However, if the patient does show marked and persistent  
8  
9 89 exocrine insufficiency during follow-up (either during the outpatient clinic visit after repeat  
10  
11 90 transabdominal ultrasound or after the EUS), this will be considered to be diagnostic for chronic  
12  
13 91 pancreatitis. The same is applicable for histology of an adequate histological specimen: this is not part  
14  
15 92 of standard work-up, however, if a typical histological specimen is obtained during follow-up, this will  
16  
17 93 be considered to be diagnostic for chronic pancreatitis.  
18  
19  
20  
21  
22 94

23  
24 95 Clinical recovery from acute pancreatitis: resolution of pancreatic inflammation, present when one of  
25  
26 96 the following criteria is met:

- 27  
28  
29 97 1. Discharge from the hospital  
30  
31  
32 98 2. Normal inflammation parameters in laboratory tests  
33  
34  
35 99 3. No signs of pancreatic inflammation on imaging  
36  
37

38 100  
39  
40  
41 101 Cystic fibrosis: an autosomal recessive disorder caused by a mutation in the CFTR gene, resulting in  
42  
43 102 defective chloride channels in epithelial cells, diagnosed by either a concentration in sweat of chloride  
44  
45 103 greater than 60 mmol/L on repeated analysis, confirmation of a CFTR gene mutation, or both (10).  
46  
47

48 104  
49  
50  
51 105 Cystic fibrosis related pancreatitis: pancreatitis caused by defective ductular and acinar pancreatic  
52  
53 106 secretion, diagnosed when a patient with a history of cystic fibrosis presents with an acute pancreatitis  
54  
55 107 in the absence of another origin (10).  
56  
57

58  
59 108  
60

1  
2  
3 109 Familial pancreatitis: acute pancreatitis from any cause that occurs in a family with an incidence that  
4  
5 110 is greater than would be expected by chance alone, given the size of the family and the standardized  
6  
7 111 incidence of pancreatitis within the Dutch population, defined as acute pancreatitis in patients who  
8  
9 112 have two or more direct blood-related family members (parents, children or siblings) who have had an  
10  
11 113 episode of acute pancreatitis (11-13).

14  
15 114

16  
17  
18 115 Fever: a body temperature of 38.5°C or higher.

19  
20  
21 116

22  
23  
24 117 Hereditary pancreatitis: otherwise unexplained pancreatitis in an individual from a family in which the  
25  
26 118 pancreatitis phenotype appears to be inherited through a disease-causing gene mutation expressed in  
27  
28 119 an autosomal dominant pattern, defined as pancreatitis in patients with a known mutation in the  
29  
30 120 PRSS1 gene, the SPINK1 gene, the CFTR gene, the CTSC gene, the CLDN2 gene or the CPA1 gene, or if  
31  
32 121 the patient has a direct family member (parents, children, siblings) with one or more of the above  
33  
34 122 mentioned mutations and has at least one direct family member who has had an episode of acute  
35  
36 123 pancreatitis or has chronic pancreatitis (13, 14).

37  
38  
39  
40 124

41  
42  
43 125 Hypercalcemic pancreatitis: acute pancreatitis caused by hypercalcemia and diagnosed when no signs  
44  
45 126 of a biliary pancreatitis are found in standard work-up and the patient has a blood serum calcium level  
46  
47 127 of at least 12 mg/dl or 3 mmol/l, corrected for the serum albumin level, as first measured during  
48  
49 128 admission (15).

50  
51  
52 129

53  
54  
55 130

1  
2  
3 131 Hypertriglyceridemic pancreatitis: acute pancreatitis based on hypertriglyceridemia and diagnosed if  
4  
5 132 a biliary etiology is not demonstrated by standard work-up and the patient has a blood serum  
6  
7 133 triglyceride level of at least 1000 mg/dl (or 11.2 mmol/l) under fasting conditions, as first measured  
8  
9 134 during admission (16).  
10  
11  
12

13 135  
14  
15 136 Hypothermia: a body temperature of 35.9°C or lower.  
16  
17

18 137  
19  
20  
21 138 Infected (extra)pancreatic necrosis: presence of microorganisms in (extra-)pancreatic necrosis,  
22  
23 139 confirmed by a positive culture obtained by means of fine needle aspiration or from the first drainage  
24  
25 140 procedure or necrosectomy, the presence of gas in the (extra-)pancreatic collection on CT, or the  
26  
27 141 presence of clinical signs of persistent sepsis or progressive clinical deterioration despite maximal  
28  
29 142 support on the intensive care unit (ICU) without other causes for infection (ruled out should be:  
30  
31 143 pneumonia, urinary tract infection, wound infection, endocarditis, abdominal sepsis or any other  
32  
33 144 infection which could be suspected based on the individual patient's clinical presentation) (17).  
34  
35  
36  
37

38 145  
39  
40 146 Medication associated pancreatitis: acute pancreatitis is considered to be caused by drugs when a  
41  
42 147 biliary cause is not demonstrated by standard work-up, the patient uses one or multiple drug(s) listed  
43  
44 148 in table S1 in additional file 1, the drug has been started or increased in dosage within a reasonable  
45  
46 149 temporal sequence, in principle 1 month before the onset of the pancreatitis, and has a positive  
47  
48 150 dechallenge (a drug reaction that is confirmed by stopping the drug) (18, 19).  
49  
50

51 151  
52  
53  
54 152 Microlithiasis: stones or concrements, smaller than four mm, in the gall bladder or the bile ducts (20).  
55  
56

57 153  
58  
59  
60



1  
2  
3 154 Murphy's sign: the phenomenon where compression of the right upper quadrant causes the patient  
4  
5 155 to catch their breath due to pain when taking a deep breath (21).  
6  
7

8 156  
9  
10  
11 157 Pancreas divisum: a congenital malformation of the main pancreatic duct (Wirsung's duct) with two  
12  
13 158 separate ducts (a separate ventral duct of Wirsung and a dorsal duct of Santorini) as opposed to one  
14  
15 159 main duct (of Wirsung) (22).  
16  
17

18 160  
19  
20  
21 161 Positive imaging: positive imaging is defined as imaging during which a definitive cause for the acute  
22  
23 162 pancreatitis episode can be found; or during which abnormalities are visualized constituting a  
24  
25 163 definitive cause, after obtaining tissue and pathological examination. So, if during EUS ductal  
26  
27 164 abnormalities are found, yet not enough to make a certain diagnosis of chronic pancreatitis according  
28  
29 165 to the M-ANNHEIM classification (8), this imaging is considered to be negative, even though it did show  
30  
31 166 abnormalities. This approach is chosen because the aim of this study is to determine the rate of which  
32  
33 167 EUS can find a causative factor for a previous acute pancreatitis episode. For the same reason, finding  
34  
35 168 of an anatomical abnormality after a first episode of acute pancreatitis is not scored as positive  
36  
37 169 imaging. An overview of the exact findings scored as positive imaging is provided in table 3 of the main  
38  
39 170 manuscript.  
40  
41  
42  
43  
44  
45  
46  
47  
48  
49  
50  
51  
52  
53  
54  
55  
56  
57  
58  
59  
60

171  
172 Post-ERCP pancreatitis: pancreatitis caused by mechanical injury from instrumentation and hydrostatic  
173 injury from contrast injection during ERCP, diagnosed if a patient develops a pancreatitis within 24  
174 hours of an ERCP without indications of another origin (23).  
175

1  
2  
3 176 Postoperative pancreatitis: pancreatitis caused by perioperative hypoperfusion of the pancreas,  
4  
5 177 diagnosed if a patient develops a pancreatitis within 24 hours of abdominal surgery in the absence of  
6  
7 178 indications for another origin (24).  
8  
9

10 179  
11  
12  
13 180 Posttraumatic pancreatitis: pancreatitis caused by pancreatic injury due to trauma to the abdomen,  
14  
15 181 diagnosed when the patient describes a typical blunt trauma to the upper abdomen and pancreatic  
16  
17 182 trauma is visible on imaging (25).  
18  
19

20 183  
21  
22  
23 184 Recurrence rate: the risk of a recurrent episode of acute pancreatitis.  
24  
25

26 185  
27  
28  
29 186 Sludge: solid material which results from the slow settling of particles dispersed in bile (20).  
30  
31

32 187  
33  
34

35 188  
36  
37

38 189  
39  
40

41 190  
42  
43

44 191  
45  
46

47 192  
48  
49

50 193  
51  
52

53 194  
54  
55

56 195  
57  
58

59 196  
60

1  
2  
3 197 Standard work-up:  
4  
5

6 198 1. A detailed personal and family history, including questions on:  
7

8  
9 199 a. Alcohol use  
10

11  
12 200 b. Recent ERCP  
13

14  
15 201 c. Recent start of or changes in use of drugs associated with acute pancreatitis  
16

17  
18 202 d. Recent major abdominal trauma  
19

20  
21 203 e. Recent abdominal surgery  
22

23  
24 204 f. Familial pancreatitis  
25

26  
27 205 g. Hereditary pancreatitis  
28

29  
30 206 h. Cystic fibrosis related pancreatitis  
31

32 207 2. Laboratory tests, including:  
33

34  
35 208 a. Blood serum triglycerides level, first measured during admission  
36

37  
38 209 b. Blood serum calcium level, corrected for the serum albumin level, first measured  
39 during admission  
40 210

41  
42  
43 211 c. Blood serum ALT level on admission  
44  
45

46 212 3. Imaging via transabdominal ultrasound, MRI or MRCP after clinical recovery  
47  
48

49 213  
50  
51

52 214 Biliary events: acute cholecystitis; biliary colic's requiring readmission; biliary pancreatitis; cholangitis;  
53  
54 215 or obstructive choledocholithiasis needing ERCP.  
55  
56

57 216  
58  
59  
60

1  
2  
3 217 Acute cholecystitis: an acute inflammation of the gall bladder, diagnosed when one item in A, B and C

4  
5 218 is present:

6  
7  
8 219 A) Local signs of inflammation

9  
10  
11 220 1. Murphy's' sign, or

12  
13  
14 221 2. Right upper abdominal quadrant mass, pain or tenderness

15  
16  
17 222 B) Systemic signs of inflammation

18  
19  
20 223 1. Fever or hypothermia, or

21  
22  
23 224 2. Elevated C-reactive protein (CRP), or

24  
25  
26 225 3. Elevated white blood cell count

27  
28  
29 226 C) Imaging findings characteristic of acute cholecystitis (26, 27)

30  
31 227 Note: acute cholecystitis and cholangitis (see definition below) are defined according to the Tokyo  
32  
33 228 classification which defines fever as a body temperature of 38°C or higher; however, fever will be  
34  
35 229 defined in this study as hyperthermia of 38.5°C or higher and hypothermia will be added as a systemic  
36  
37 230 sign of inflammation, as this more accurately reflects clinical practice in the Netherlands.

38  
39  
40  
41 231

42  
43  
44 232 Biliary colic: upper abdominal pain (either right upper quadrant or epigastric pain) lasting at least 30  
45  
46 233 minutes, often associated with restlessness (28).

47  
48  
49 234

50  
51 235

52  
53 236

54  
55  
56 237

1  
2  
3 238 Cholangitis: an inflammation of the bile duct(s), diagnosed when one item in each of the following  
4  
5 239 categories is present:

6  
7  
8 240 1. Systemic inflammation

9  
10  
11 241 a. Fever, hypothermia and/or shaking chills

12  
13  
14 242 b. Laboratory data: evidence of inflammatory response (abnormal white blood cell  
15  
16 243 counts (defined as smaller than 4,000/ $\mu$ l or larger than 10,000/ $\mu$ l), increase of serum  
17  
18 244 CRP levels (defined as 1 mg/dl or higher), and other changes indicating inflammation)

19  
20  
21 245 2. Cholestasis

22  
23  
24 246 a. Jaundice (defined as a total bilirubin of 2 mg/dl or higher)

25  
26  
27 247 b. Laboratory data: abnormal liver function tests (increased serum alkaline phosphatase,  
28  
29 248 gamma-glutamyltransferase (gamma-GT), aspartate transaminase (AST) and ALT  
30  
31 249 levels (defined as more than 1.5 times the ULN))

32  
33  
34 250 3. Imaging

35  
36  
37 251 a. Biliary dilatation

38  
39  
40 252 b. Evidence of the etiology on imaging (stricture, stone, stent etc.) (26)

41  
42  
43 253

44  
45  
46 254 Obstructive choledocholithiasis: presence of gallstones, microlithiasis or biliary sludge in the CBD on  
47  
48 255 imaging, requiring an ERCP, according to the treating physician.

49  
50  
51 256  
52  
53  
54  
55  
56  
57  
58  
59  
60

## 257 References

- 258 1. Banks PA, Bollen TL, Dervenis C, Gooszen HG, Johnson CD, Sarr MG, et al. Classification of acute  
259 pancreatitis--2012: revision of the Atlanta classification and definitions by international consensus. *Gut*.  
260 2013;62(1):102-11.
- 261 2. Working Group IAP/APA Acute Pancreatitis Guidelines. IAP/APA evidence-based guidelines for the  
262 management of acute pancreatitis. *Pancreatology*. 2013;13(4 Suppl 2):e1-15.
- 263 3. Stolle M, Sack PM, Thomasius R. Binge drinking in childhood and adolescence: epidemiology,  
264 consequences, and interventions. *Dtsch Arztebl Int*. 2009;106(19):323-8.
- 265 4. Sadr Azodi O, Orsini N, Andren-Sandberg A, Wolk A. Effect of type of alcoholic beverage in causing  
266 acute pancreatitis. *Br J Surg*. 2011;98(11):1609-16.
- 267 5. Midanik LT. Drunkenness, feeling the effects and 5+ measures. *Addiction*. 1999;94(6):887- 97.
- 268 6. Ammori BJ, Boreham B, Lewis P, Roberts SA. The Biochemical Detection of Biliary Etiology of Acute  
269 Pancreatitis on Admission: A Revisit in the Modern Era of Biliary Imaging. *Pancreas*. 2003;26:e32-5.
- 270 7. Schepers NJ, Bakker OJ, Besselink MG, Bollen TL, Dijkgraaf MG, van Eijck CH, et al. Early biliary  
271 decompression versus conservative treatment in acute biliary pancreatitis (APEC trial): study protocol for a  
272 randomized controlled trial. *Trials*. 2016;17:5.
- 273 8. Schneider A, Lohr JM, Singer MV. The M-ANNHEIM classification of chronic pancreatitis: introduction  
274 of a unifying classification system based on a review of previous classifications of the disease. *J Gastroenterol*.  
275 2007;42(2):101-19.
- 276 9. Sarner M, Cotton PB. Classification of pancreatitis. *Gut*. 1984;25:756-9.
- 277 10. Ratjen F, Döring G. Cystic fibrosis. *The Lancet*. 2003;361(9358):681-9.
- 278 11. Spanier B, Bruno MJ, Dijkgraaf MG. Incidence and mortality of acute and chronic pancreatitis in the  
279 Netherlands: a nationwide record-linked cohort study for the years 1995-2005. *World J Gastroenterol*.  
280 2013;19(20):3018-26.
- 281 12. CBS StatLine. Households; size, position in household, January 1st 1995-2013 StatLine: Central Bureau  
282 for Statistics 2015 [Available from:  
283 [http://statline.cbs.nl/Statweb/publication/?VW=T&DM=SLNL&PA=37312&D1=a&D2=0,5,10,\(1-2\)-](http://statline.cbs.nl/Statweb/publication/?VW=T&DM=SLNL&PA=37312&D1=a&D2=0,5,10,(1-2)-&HD=180221-1109&HDR=G1&STB=T)  
284 [I&HD=180221-1109&HDR=G1&STB=T](http://statline.cbs.nl/Statweb/publication/?VW=T&DM=SLNL&PA=37312&D1=a&D2=0,5,10,(1-2)-&HD=180221-1109&HDR=G1&STB=T).

- 1  
2  
3 285 13. Whitcomb DC. Genetic aspects of pancreatitis. *Annu Rev Med.* 2010;61:413-24.  
4  
5 286 14. Whitcomb DC. Hereditary diseases of the pancreas. In: Yamada T AD, Kaplowitz N, Laine L, Owyang C,  
6  
7 287 Powell DW, editors, editor. *Textbook of Gastroenterology.* 4th ed. Philadelphia: Lippincott Williams & Wilkins;  
8  
9 288 2003. p. 2147–65.  
10  
11 289 15. Shane E, Dinaz I. Hypercalcemia: Pathogenesis, clinical manifestations, differential diagnosis and  
12  
13 290 management. In: Favus M, editor. *Primer on the metabolic bone diseases and disorders of mineral metabolism.*  
14  
15 291 6th ed. Philadelphia: Lippincott, Williams, and Wilkins; 2006. p. 26-176.  
16  
17 292 16. Berglund L, Brunzell JD, Goldberg AC, Goldberg IJ, Sacks F, Murad MH, et al. Evaluation and treatment  
18  
19 293 of hypertriglyceridemia: an Endocrine Society clinical practice guideline. *J Clin Endocrinol Metab.*  
20  
21 294 2012;97(9):2969-89.  
22  
23 295 17. van Brunschot S, van Grinsven J, van Santvoort HC, Bakker OJ, Besselink MG, Boermeester MA, et al.  
24  
25 296 Endoscopic or surgical step-up approach for infected necrotising pancreatitis: a multicentre randomised trial.  
26  
27 297 *The Lancet.* 2018;391(10115):51-8.  
28  
29 298 18. Nitsche C, Maertin S, Scheiber J, Ritter CA, Lerch MM, Mayerle J. Drug-induced pancreatitis. *Curr*  
30  
31 299 *Gastroenterol Rep.* 2012;14(2):131-8.  
32  
33 300 19. Lankisch PG, Apte M, Banks PA. Acute pancreatitis. *The Lancet.* 2015;386(9988):85-96.  
34  
35 301 20. Jungst C, Kullak-Ublick GA, Jungst D. Gallstone disease: Microlithiasis and sludge. *Best Pract Res Clin*  
36  
37 302 *Gastroenterol.* 2006;20(6):1053-62.  
38  
39 303 21. Murphy JB. The diagnosis of gall-stones. *Am Med News.* 1903;82:825.33.  
40  
41 304 22. Cotton P. Congenital anomaly of pancreas divisum as cause of obstructive pain and pancreatitis. *Gut.*  
42  
43 305 1980;21:105-14.  
44  
45 306 23. Cotton PB, Lehman G, Vennes J, Geenen JE, Russell RCG, Meyers WC, et al. Endoscopic sphincterotomy  
46  
47 307 complications and their management: an attempt at consensus. *Gastrointest Endosc.* 1991;37:383-93.  
48  
49 308 24. Connor S. Defining post-operative pancreatitis as a new pancreatic specific complication following  
50  
51 309 pancreatic resection. *HPB (Oxford).* 2016;18(8):642-51.  
52  
53 310 25. Booth F, Flint L. Pancreatoduodenal trauma. In: ed BJ, editor. *Blunt multiple trauma.* New York: Marcel  
54  
55 311 Dekker; 1990. p. 497-509.  
56  
57  
58  
59  
60

- 1  
2  
3 312 26. Miura F, Okamoto K, Takada T, Strasberg SM, Asbun HJ, Pitt HA, et al. Tokyo Guidelines 2018: initial  
4  
5 313 management of acute biliary infection and flowchart for acute cholangitis. J Hepatobiliary Pancreat Sci.  
6  
7 314 2018;25(1):31-40.  
8  
9 315 27. Yokoe M, Takada T, Strasberg SM, Solomkin JS, Mayumi T, Gomi H, et al. TG13 diagnostic criteria and  
10  
11 316 severity grading of acute cholecystitis (with videos). Journal of Hepato-Biliary-Pancreatic Sciences.  
12  
13 317 2013;20(1):35-46.  
14  
15 318 28. French E, Robb W. Biliary and renal colic. Br Med J. 1963:135-8.  
16

17 319  
18  
19  
20  
21  
22  
23  
24  
25  
26  
27  
28  
29  
30  
31  
32  
33  
34  
35  
36  
37  
38  
39  
40  
41  
42  
43  
44  
45  
46  
47  
48  
49  
50  
51  
52  
53  
54  
55  
56  
57  
58  
59  
60



## Additional file 3: Short Form 36 Questionnaire

### English version

- 1  
2  
3  
4  
5  
6  
7  
8  
9  
10  
11  
12  
13  
14  
15  
16  
17  
18  
19  
20  
21  
22  
23  
24  
25  
26  
27  
28  
29  
30  
31  
32  
33  
34  
35  
36  
37  
38  
39  
40  
41  
42  
43  
44  
45  
46  
47  
48  
49  
50  
51  
52  
53  
54  
55  
56  
57  
58  
59  
60
1. In general, would you say your health is:
- excellent
  - very good
  - good
  - fair
  - poor
2. **Compared to one year ago**, how would you rate your health in general **now**?
- much better now than one year ago
  - somewhat better now than one year ago
  - about the same
  - somewhat worse now than one year ago
  - much worse now than one year ago

- 1  
2  
3 3. The following items are about activities you might do during a typical day.  
4  
5 Does **your health now limit you** in these activities? If so, how much?  
6  
7

|    | <b>Yes, limited<br/>a lot</b> | <b>Yes, limited<br/>a little</b> | <b>No, not<br/>limited at all</b> |
|----|-------------------------------|----------------------------------|-----------------------------------|
| 8  |                               |                                  |                                   |
| 9  |                               |                                  |                                   |
| 10 |                               |                                  |                                   |
| 11 |                               |                                  |                                   |
| 12 |                               |                                  |                                   |
| 13 |                               |                                  |                                   |
| 14 |                               |                                  |                                   |
| 15 |                               |                                  |                                   |
| 16 |                               |                                  |                                   |
| 17 |                               |                                  |                                   |
| 18 |                               |                                  |                                   |
| 19 |                               |                                  |                                   |
| 20 |                               |                                  |                                   |
| 21 |                               |                                  |                                   |
| 22 |                               |                                  |                                   |
| 23 |                               |                                  |                                   |
| 24 |                               |                                  |                                   |
| 25 |                               |                                  |                                   |
| 26 |                               |                                  |                                   |
| 27 |                               |                                  |                                   |
| 28 |                               |                                  |                                   |
| 29 |                               |                                  |                                   |
| 30 |                               |                                  |                                   |
| 31 |                               |                                  |                                   |
| 32 |                               |                                  |                                   |
| 33 |                               |                                  |                                   |
| 34 |                               |                                  |                                   |
| 35 |                               |                                  |                                   |
| 36 |                               |                                  |                                   |
| 37 |                               |                                  |                                   |
| 38 |                               |                                  |                                   |
| 39 |                               |                                  |                                   |
| 40 |                               |                                  |                                   |
| 41 |                               |                                  |                                   |
| 42 |                               |                                  |                                   |
| 43 |                               |                                  |                                   |
| 44 |                               |                                  |                                   |
| 45 |                               |                                  |                                   |
| 46 |                               |                                  |                                   |
| 47 |                               |                                  |                                   |
| 48 |                               |                                  |                                   |
| 49 |                               |                                  |                                   |
| 50 |                               |                                  |                                   |
| 51 |                               |                                  |                                   |
| 52 |                               |                                  |                                   |
| 53 |                               |                                  |                                   |
| 54 |                               |                                  |                                   |
| 55 |                               |                                  |                                   |
| 56 |                               |                                  |                                   |
| 57 |                               |                                  |                                   |
| 58 |                               |                                  |                                   |
| 59 |                               |                                  |                                   |
| 60 |                               |                                  |                                   |

1  
2  
3  
4  
5  
6  
7  
8  
9  
10  
11  
12  
13  
14  
15  
16  
17  
18  
19  
20  
21  
22  
23  
24  
25  
26  
27  
28  
29  
30  
31  
32  
33  
34  
35  
36  
37  
38  
39  
40  
41  
42  
43  
44  
45  
46  
47  
48  
49  
50  
51  
52  
53  
54  
55  
56  
57  
58  
59  
60

4. During the **past 4 weeks**, have you had any of the following problems with your work or other regular daily activities **as a result of your physical health?**

- |                                                                                                      | Yes                      | No                       |
|------------------------------------------------------------------------------------------------------|--------------------------|--------------------------|
| a. Cut down the <b>amount of time</b> you spent on work or other activities                          | <input type="checkbox"/> | <input type="checkbox"/> |
| b. <b>Accomplished less</b> than you would like                                                      | <input type="checkbox"/> | <input type="checkbox"/> |
| c. Were limited in the <b>kind</b> of work or other activities                                       | <input type="checkbox"/> | <input type="checkbox"/> |
| d. Had <b>difficulty</b> performing the work or other activities (for example, it took extra effort) | <input type="checkbox"/> | <input type="checkbox"/> |

5. During the **past 4 weeks**, have you had any of the following problems with your work or other regular daily activities **as a result of any emotional problems** (such as feeling depressed or anxious)?

- |                                                                             | Yes                      | No                       |
|-----------------------------------------------------------------------------|--------------------------|--------------------------|
| a. Cut down the <b>amount of time</b> you spent on work or other activities | <input type="checkbox"/> | <input type="checkbox"/> |
| b. <b>Accomplished less</b> than you would like                             | <input type="checkbox"/> | <input type="checkbox"/> |
| c. Didn't do work or other activities as <b>carefully</b> as usual          | <input type="checkbox"/> | <input type="checkbox"/> |

1  
2  
3  
4  
5  
6  
7  
8  
9  
10  
11  
12  
13  
14  
15  
16  
17  
18  
19  
20  
21  
22  
23  
24  
25  
26  
27  
28  
29  
30  
31  
32  
33  
34  
35  
36  
37  
38  
39  
40  
41  
42  
43  
44  
45  
46  
47  
48  
49  
50  
51  
52  
53  
54  
55  
56  
57  
58  
59  
60

6. During the **past 4 weeks**, to what extent has your physical health or emotional problems interfered with your normal social activities with family, friends, neighbors, or groups?

not at all  
 slightly  
 moderately  
 quite a bit  
 extremely

7. How much **bodily** pain have you had during the **past 4 weeks**?

none  
 very mild  
 mild  
 moderate  
 severe  
 very severe

8. During the **past 4 weeks**, how much did **pain** interfere with your normal work (including both work outside the home and housework)?

not at all  
 a little bit  
 moderately  
 quite a bit  
 extremely

9. These questions are about how you feel and how things have been with you **during the past 4 weeks**. For each question, please give the one answer that comes closest to the way you have been feeling.

| How much of the time during the <b>past 4 weeks</b> ...                | <b>All of the time</b>   | <b>Most of the time</b>  | <b>A good bit of the time</b> | <b>Some of the time</b>  | <b>A little of the time</b> | <b>None of the time</b>  |
|------------------------------------------------------------------------|--------------------------|--------------------------|-------------------------------|--------------------------|-----------------------------|--------------------------|
| a. Did you feel full of pep?                                           | <input type="checkbox"/> | <input type="checkbox"/> | <input type="checkbox"/>      | <input type="checkbox"/> | <input type="checkbox"/>    | <input type="checkbox"/> |
| b. Have you been a very nervous person?                                | <input type="checkbox"/> | <input type="checkbox"/> | <input type="checkbox"/>      | <input type="checkbox"/> | <input type="checkbox"/>    | <input type="checkbox"/> |
| c. Have you felt so down in the dumps that nothing could cheer you up? | <input type="checkbox"/> | <input type="checkbox"/> | <input type="checkbox"/>      | <input type="checkbox"/> | <input type="checkbox"/>    | <input type="checkbox"/> |
| d. Have you felt calm and peaceful?                                    | <input type="checkbox"/> | <input type="checkbox"/> | <input type="checkbox"/>      | <input type="checkbox"/> | <input type="checkbox"/>    | <input type="checkbox"/> |
| e. Did you have a lot of energy?                                       | <input type="checkbox"/> | <input type="checkbox"/> | <input type="checkbox"/>      | <input type="checkbox"/> | <input type="checkbox"/>    | <input type="checkbox"/> |
| f. Have you felt downhearted and blue?                                 | <input type="checkbox"/> | <input type="checkbox"/> | <input type="checkbox"/>      | <input type="checkbox"/> | <input type="checkbox"/>    | <input type="checkbox"/> |
| g. Did you feel worn out?                                              | <input type="checkbox"/> | <input type="checkbox"/> | <input type="checkbox"/>      | <input type="checkbox"/> | <input type="checkbox"/>    | <input type="checkbox"/> |
| h. Have you been a happy person?                                       | <input type="checkbox"/> | <input type="checkbox"/> | <input type="checkbox"/>      | <input type="checkbox"/> | <input type="checkbox"/>    | <input type="checkbox"/> |
| i. Did you feel tired?                                                 | <input type="checkbox"/> | <input type="checkbox"/> | <input type="checkbox"/>      | <input type="checkbox"/> | <input type="checkbox"/>    | <input type="checkbox"/> |

- 1  
2  
3  
4  
5  
6  
7  
8  
9  
10  
11  
12  
13  
14  
15  
16  
17  
18  
19  
20  
21  
22  
23  
24  
25  
26  
27  
28  
29  
30  
31  
32  
33  
34  
35  
36  
37  
38  
39  
40  
41  
42  
43  
44  
45  
46  
47  
48  
49  
50  
51  
52  
53  
54  
55  
56  
57  
58  
59  
60
10. During the **past 4 weeks**, how much of the time has **your physical health or emotional problems** interfered with your social activities (like visiting with friends, relatives, etc.)?
- all of the time
- most of the time
- some of the time
- a little of the time
- none of the time

11. How TRUE or FALSE is **each** of the following statements for you?

|                                                          | <b>Definitely true</b>   | <b>Mostly true</b>       | <b>Don't know</b>                   | <b>Mostly false</b>      | <b>Definitely false</b>  |
|----------------------------------------------------------|--------------------------|--------------------------|-------------------------------------|--------------------------|--------------------------|
| a. I seem to get sick a little easier than other people. | <input type="checkbox"/> | <input type="checkbox"/> | <input type="checkbox"/>            | <input type="checkbox"/> | <input type="checkbox"/> |
| b. I am as healthy as anybody I know.                    | <input type="checkbox"/> | <input type="checkbox"/> | <input type="checkbox"/>            | <input type="checkbox"/> | <input type="checkbox"/> |
| c. I expect my health to get worse.                      | <input type="checkbox"/> | <input type="checkbox"/> | <input checked="" type="checkbox"/> | <input type="checkbox"/> | <input type="checkbox"/> |
| d. My health is excellent.                               | <input type="checkbox"/> | <input type="checkbox"/> | <input type="checkbox"/>            | <input type="checkbox"/> | <input type="checkbox"/> |

**Space for additional remarks with the questionnaire:**

## Dutch version

- 1  
2  
3  
4  
5  
6  
7  
8  
9  
10  
11  
12  
13  
14  
15  
16  
17  
18  
19  
20  
21  
22  
23  
24  
25  
26  
27  
28  
29  
30  
31  
32  
33  
34  
35  
36  
37  
38  
39  
40  
41  
42  
43  
44  
45  
46  
47  
48  
49  
50  
51  
52  
53  
54  
55  
56  
57  
58  
59  
60
1. Wat vindt u, over het algemeen genomen, van uw gezondheid?
- uitstekend
  - zeer goed
  - goed
  - matig
  - slecht
2. In vergelijking met 1 jaar geleden, hoe zou u nu uw gezondheid in het algemeen beoordelen?
- veel beter dan een jaar geleden
  - iets beter dan een jaar geleden
  - ongeveer hetzelfde als een jaar geleden
  - iets slechter dan een jaar geleden
  - veel slechter dan een jaar geleden

1  
2  
3  
4  
5  
6  
7  
8  
9  
10  
11  
12  
13  
14  
15  
16  
17  
18  
19  
20  
21  
22  
23  
24  
25  
26  
27  
28  
29  
30  
31  
32  
33  
34  
35  
36  
37  
38  
39  
40  
41  
42  
43  
44  
45  
46  
47  
48  
49  
50  
51  
52  
53  
54  
55  
56  
57  
58  
59  
60

3. De volgende vragen gaan over dagelijkse bezigheden. Wordt u door uw **gezondheid op dit moment** beperkt bij deze bezigheden? Zo ja, in welke mate?

|                                                                                           | Ja, ernstig              | Ja, een beetje beperkt   | Nee, helemaal niet beperkt |
|-------------------------------------------------------------------------------------------|--------------------------|--------------------------|----------------------------|
| a. <i>Forse inspanning</i> (zoals hardlopen, zware voorwerpen tillen, inspannend sporten) | <input type="checkbox"/> | <input type="checkbox"/> | <input type="checkbox"/>   |
| b. <i>Matige inspanning</i> (zoals het verplaatsen van een tafel, stofzuigen, fietsen)    | <input type="checkbox"/> | <input type="checkbox"/> | <input type="checkbox"/>   |
| c. Tillen of boodschappen dragen                                                          | <input type="checkbox"/> | <input type="checkbox"/> | <input type="checkbox"/>   |
| d. <i>Een paar</i> trappen oplopen                                                        | <input type="checkbox"/> | <input type="checkbox"/> | <input type="checkbox"/>   |
| e. <i>Eén</i> trap oplopen                                                                | <input type="checkbox"/> | <input type="checkbox"/> | <input type="checkbox"/>   |
| f. Buigen, knielen of bukken                                                              | <input type="checkbox"/> | <input type="checkbox"/> | <input type="checkbox"/>   |
| g. <i>Meer dan een kilometer</i> lopen                                                    | <input type="checkbox"/> | <input type="checkbox"/> | <input type="checkbox"/>   |
| h. Een halve kilometer lopen                                                              | <input type="checkbox"/> | <input type="checkbox"/> | <input type="checkbox"/>   |
| i. <i>Honderd meter</i> lopen                                                             | <input type="checkbox"/> | <input type="checkbox"/> | <input type="checkbox"/>   |
| j. Uzelf wassen of aankleden                                                              | <input type="checkbox"/> | <input type="checkbox"/> | <input type="checkbox"/>   |



1  
2  
3  
4  
5  
6  
7  
8  
9  
10  
11  
12  
13  
14  
15  
16  
17  
18  
19  
20  
21  
22  
23  
24  
25  
26  
27  
28  
29  
30  
31  
32  
33  
34  
35  
36  
37  
38  
39  
40  
41  
42  
43  
44  
45  
46  
47  
48  
49  
50  
51  
52  
53  
54  
55  
56  
57  
58  
59  
60

4. Had u, ten gevolge van uw **lichamelijke gezondheid**, *de afgelopen 4 weken* één van de volgende problemen bij uw werk of andere bezigheden?

**Ja**

**Nee**

a. U heeft *minder tijd* kunnen besteden aan werk of andere bezigheden.

b. U heeft *minder bereikt* dan u zou willen.

c. U was beperkt in het *soort* werk of soort bezigheden.

d. U had moeite met het werk of andere bezigheden (het kostte u bijvoorbeeld extra inspanning).

5. Had u, ten gevolge van een **emotioneel probleem** (bijvoorbeeld doordat u zich depressief of angstig voelde), *de afgelopen 4 weken* één van de volgende problemen bij uw werk of andere bezigheden?

**Ja**

**Nee**

a. U heeft *minder tijd* kunnen besteden aan werk of andere bezigheden.

b. U heeft *minder bereikt* dan u zou willen.

c. U heeft het werk of andere bezigheden niet zo zorgvuldig gedaan als u gewend bent.

- 1  
2  
3  
4  
5  
6  
7  
8  
9  
10  
11  
12  
13  
14  
15  
16  
17  
18  
19  
20  
21  
22  
23  
24  
25  
26  
27  
28  
29  
30  
31  
32  
33  
34  
35  
36  
37  
38  
39  
40  
41  
42  
43  
44  
45  
46  
47  
48  
49  
50  
51  
52  
53  
54  
55  
56  
57  
58  
59  
60
6. In hoeverre heeft uw **lichamelijke gezondheid** of hebben uw **emotionele problemen** u *de afgelopen 4 weken* belemmerd in uw normale sociale bezigheden met gezin, vrienden, buren of anderen?
- helemaal niet  
 enigszins  
 nogal  
 veel  
 heel erg veel
7. Hoeveel **pijn** had u *de afgelopen 4 weken*?
- geen  
 heel licht  
 licht  
 nogal  
 ernstig  
 heel ernstig
8. In welke mate heeft **pijn** u *de afgelopen 4 weken* belemmerd bij uw normale werkzaamheden (zowel werk buitenshuis als huishoudelijk werk)?
- helemaal niet  
 enigszins  
 nogal  
 veel  
 heel erg veel

- 1  
2  
3  
4  
5  
6  
7  
8  
9  
10  
11  
12  
13  
14  
15  
16  
17  
18  
19  
20  
21  
22  
23  
24  
25  
26  
27  
28  
29  
30  
31  
32  
33  
34  
35  
36  
37  
38  
39  
40  
41  
42  
43  
44  
45  
46  
47  
48  
49  
50  
51  
52  
53  
54  
55  
56  
57  
58  
59  
60
12. De volgende vragen gaan over hoe u zich *de afgelopen 4 weken* heeft **gevoeld**. Wilt u bij elke vraag het antwoord aankruisen dat het beste aansluit bij hoe u zich heeft gevoeld?

Hoe vaak  
gedurende *de*  
*afgelopen 4*  
*weken*:

**Voortdurend**   **Meestal**   **Vaak**   **Soms**   **Zelden**   **Nooit**

- |    |                                                     |                          |                          |                          |                          |                          |                          |
|----|-----------------------------------------------------|--------------------------|--------------------------|--------------------------|--------------------------|--------------------------|--------------------------|
| a. | voelde u zich levenslustig?                         | <input type="checkbox"/> | <input type="checkbox"/> | <input type="checkbox"/> | <input type="checkbox"/> | <input type="checkbox"/> | <input type="checkbox"/> |
| b. | voelde u zich erg zenuwachtig?                      | <input type="checkbox"/> | <input type="checkbox"/> | <input type="checkbox"/> | <input type="checkbox"/> | <input type="checkbox"/> | <input type="checkbox"/> |
| c. | zat u zo erg in de put dat niets u kon opvrolijken? | <input type="checkbox"/> | <input type="checkbox"/> | <input type="checkbox"/> | <input type="checkbox"/> | <input type="checkbox"/> | <input type="checkbox"/> |
| d. | voelde u zich kalm en rustig?                       | <input type="checkbox"/> | <input type="checkbox"/> | <input type="checkbox"/> | <input type="checkbox"/> | <input type="checkbox"/> | <input type="checkbox"/> |
| e. | voelde u zich erg energiek?                         | <input type="checkbox"/> | <input type="checkbox"/> | <input type="checkbox"/> | <input type="checkbox"/> | <input type="checkbox"/> | <input type="checkbox"/> |
| f. | voelde u zich neerslachtig en somber?               | <input type="checkbox"/> | <input type="checkbox"/> | <input type="checkbox"/> | <input type="checkbox"/> | <input type="checkbox"/> | <input type="checkbox"/> |
| g. | voelde u zich uitgeblust?                           | <input type="checkbox"/> | <input type="checkbox"/> | <input type="checkbox"/> | <input type="checkbox"/> | <input type="checkbox"/> | <input type="checkbox"/> |
| h. | voelde u zich gelukkig?                             | <input type="checkbox"/> | <input type="checkbox"/> | <input type="checkbox"/> | <input type="checkbox"/> | <input type="checkbox"/> | <input type="checkbox"/> |
| i. | voelde u zich moe?                                  | <input type="checkbox"/> | <input type="checkbox"/> | <input type="checkbox"/> | <input type="checkbox"/> | <input type="checkbox"/> | <input type="checkbox"/> |

- 1  
2  
3  
4  
5  
6  
7  
8  
9  
10  
11  
12  
13  
14  
15  
16  
17
10. *Hoe vaak* hebben uw **lichamelijke gezondheid of emotionele problemen** gedurende *de afgelopen 4 weken* uw sociale activiteiten (zoals bezoek aan vrienden of naaste familieleden) belemmerd?
- voortdurend  
 meestal  
 soms  
 zelden  
 nooit

18  
19  
20  
21  
22

11. Wilt u het antwoord kiezen dat het beste weergeeft hoe juist of onjuist u elk van de volgende uitspraken voor uzelf vindt?

23  
24  
25  
26  
27  
28  
29  
30  
31  
32  
33  
34  
35  
36  
37  
38  
39  
40  
41  
42  
43  
44  
45  
46  
47  
48  
49  
50  
51  
52

|                                                            | Volkomen juist           | Grotendeels juist        | Weet ik niet             | Grotendeels onjuist      | Volkomen onjuist         |
|------------------------------------------------------------|--------------------------|--------------------------|--------------------------|--------------------------|--------------------------|
| a. Ik lijk gemakkelijker ziek te worden dan andere mensen. | <input type="checkbox"/> | <input type="checkbox"/> | <input type="checkbox"/> | <input type="checkbox"/> | <input type="checkbox"/> |
| b. Ik ben net zo gezond als andere mensen die ik ken.      | <input type="checkbox"/> | <input type="checkbox"/> | <input type="checkbox"/> | <input type="checkbox"/> | <input type="checkbox"/> |
| c. Ik verwacht dat mijn gezondheid achteruit zal gaan.     | <input type="checkbox"/> | <input type="checkbox"/> | <input type="checkbox"/> | <input type="checkbox"/> | <input type="checkbox"/> |
| d. Mijn gezondheid is uitstekend.                          | <input type="checkbox"/> | <input type="checkbox"/> | <input type="checkbox"/> | <input type="checkbox"/> | <input type="checkbox"/> |

53  
54  
55  
56  
57  
58  
59  
60

**Ruimte voor aanvullende opmerkingen bij de vragenlijst:**
