# Supplementary material for: Role of endoscopic ultrasonography in the diagnostic work-up of idiopathic acute pancreatitis (PICUS): study protocol for a nationwide prospective cohort study
Source: PubMed Central journal article supplement (PMC7440829; doi:10.1136/bmjopen-2019-035504), 2020-08-20
Supplement: bmjopen-2019-035504supp001.pdf [file bmjopen-2019-035504supp001.pdf]

## Additional file 1: Table S1 Drugs associated with acute pancreatitis

| Drugs associated with acute pancreatitis |              |                     |                 |                                |
|------------------------------------------|--------------|---------------------|-----------------|--------------------------------|
| Acetaminophen                            | Cisplatin    | Hydrochlorothiazide | Methyldopa      | Pentavalent antimony compounds |
| Asparaginase                             | Cytarabine   | Interferon alpha    | Metronidazole   |                                |
| Azathioprine                             | Didanosine   | Itraconazole        | Octreotide      | Phenformin                     |
| Bortezomib                               | Enalapril    | Lamivudine          | Olanzapine      | Simvastatin                    |
| Capecitabine                             | Erythromycin | Mercaptopurine      | Opiates         | Steroids                       |
| Carbamazepine                            | Estrogens    | Mesalazine          | Oxyphenbutazone | Sulfasalazine                  |
| Cimetidine                               | Furosemide   | Olsalazine          | Pentamidine     | co-trimoxazole                 |

*Drugs with a definite association with acute pancreatitis (1, 2)*

## References

1. Nitsche C, Maertin S, Scheiber J, Ritter CA, Lerch MM, Mayerle J. Drug-induced pancreatitis. *Curr Gastroenterol Rep.* 2012;14(2):131-8.
2. Lankisch PG, Apte M, Banks PA. Acute pancreatitis. *The Lancet.* 2015;386(9988):85-96.
