# Supplementary material for: Role of endoscopic ultrasonography in the diagnostic work-up of idiopathic acute pancreatitis (PICUS): study protocol for a nationwide prospective cohort study
Source: PubMed Central journal article supplement (PMC7440829; doi:10.1136/bmjopen-2019-035504), 2020-08-20
Supplement: bmjopen-2019-035504supp002.pdf [file bmjopen-2019-035504supp002.pdf]

## 1 Additional file 2: Relevant definitions

2 Acute pancreatitis: an acute inflammation of the pancreatic parenchyma, diagnosed when at least two  
3 of the three following characteristics are present (1):

- 4 1. Clinical features of acute pancreatitis, such as upper abdominal pain
- 5 2. Elevated serum amylase or lipase levels of at least three times the upper limit of normal (ULN)
- 6 3. Signs of acute pancreatitis on imaging

7 Note: no value of the required serum amylase or lipase level is provided as every participating center  
8 has a local laboratory, which is why each center may use different normal range values.

9

10 Idiopathic acute pancreatitis is considered to be present if no etiology is found in standard work-up,  
11 according to the IAP/APA evidence-based guidelines on management of acute pancreatitis (2), which  
12 comprises at least the following tests:

- 13 1. A detailed personal and family history, including questions on:
  - 14 a. Alcohol use
  - 15 b. Recent endoscopic retrograde cholangiopancreatography (ERCP)
  - 16 c. Recent start of or changes in use of drugs associated with acute pancreatitis
  - 17 d. Recent major abdominal trauma
  - 18 e. Recent abdominal surgery
  - 19 f. Familial pancreatitis
  - 20 g. Hereditary pancreatitis

- 21                   h. Cystic fibrosis related pancreatitis
- 22           2. Laboratory tests, including:
- 23                   a. Blood serum triglycerides level on admission
- 24                   b. Blood serum calcium level, corrected for the serum albumin level, on admission
- 25                   c. Blood serum alanine transaminase (ALT) level on admission
- 26           3. Imaging via transabdominal ultrasound, magnetic resonance imaging (MRI) or magnetic  
27           resonance cholangiopancreatography (MRCP) after clinical recovery

28   Note: side branch or mixed type intraductal papillary mucinous neoplasms (IPMN) without dilatation  
29   of the pancreatic duct will not be considered to be a causative factor for the pancreatitis episode.

30   Note: if the imaging is not able to discriminate between gall bladder polyps or concrements, lesions  
31   smaller than 10 mm will not be considered an exclusion criterion. Lesions above 10 mm, irrespective  
32   of whether they are a polyp or a concrement, are an immediate indication for cholecystectomy, and  
33   will be excluded from PICUS.

34

35   Alcoholic pancreatitis: pancreatitis caused by an excess intake of alcohol, diagnosed when biliary  
36   etiology is not demonstrated by standard work-up and the patient has indicated (either by direct or  
37   indirect personal history or by findings during physical examination) to have drunk at least five units of  
38   alcohol in the 24 hours prior to start of abdominal complaints (or in asymptomatic acute pancreatitis:  
39   prior to diagnosis) (3-5)

40

41

42 Biliary pancreatitis: pancreatitis caused by biliary stones, microlithiasis or sludge, diagnosed when one  
43 of the following features is present:

44 1. A transient elevated ALT level of more than two times the ULN at diagnosis of acute  
45 pancreatitis, in the absence of ALT elevating comorbidity (6)

46 2. Signs of presence of gallstones, microlithiasis or sludge on imaging, defined as follows:

47 a. Gallstones, microlithiasis and/or biliary sludge, either in the gall bladder, ductus  
48 cysticus, intrahepatic bile ducts or in the common bile duct (CBD), and/or

49 b. A CBD of more than eight mm in patients 75 years old or younger or more than ten  
50 mm in patients older than 75 years at diagnosis of acute pancreatitis (7)

51 Note: no value of the required serum ALT level is provided as the normal range values depend on the  
52 sex of the patient and as every participating center has a local laboratory, which is why each center  
53 may use different normal range values.

54

55 Chronic pancreatitis: a chronic inflammation of the pancreatic parenchyma, defined as typical clinical  
56 history of chronic pancreatitis (such as recurrent pancreatitis or abdominal pain, except for primary  
57 painless pancreatitis) and one or more of the following (8):

58 1. Pancreatic calcifications

59 2. Moderate or marked ductal lesions, defined as two or more of the following abnormal features  
60 on transabdominal ultrasound, computed tomography (CT) or MRI/MRCP, according to the  
61 Cambridge classification (9):

62 a. Main pancreatic duct abnormalities, either enlargement or increased echogenicity of  
63 the duct wall (mandatory)

64 b. Pancreatic enlargement

- 65 c. Cavities
- 66 d. Duct irregularities including intraductal fillings defects, calculi or duct obstruction
- 67 e. Focal acute pancreatitis
- 68 f. Parenchymal heterogeneity
- 69 g. Irregularities of pancreatic head or body contour
- 70 3. Moderate or marked ductal lesions, defined as five or more of the following abnormal features
- 71 on endoscopic ultrasonography (EUS):
- 72 a. Enlarged gland size
- 73 b. Cysts
- 74 c. Echo-poor lesions (focal areas of reduced echogenicity)
- 75 d. Echo-rich lesions (more than three mm in diameter)
- 76 e. Accentuation of lobular pattern (e.g., echo-poor normal parenchyma surrounded by
- 77 hyperechoic strands)
- 78 f. Increased duct wall echogenicity
- 79 g. Irregularity of the main pancreatic duct (e.g., with narrowing of the duct)
- 80 h. Dilation of the main pancreatic duct
- 81 i. Visible side branches (e.g., with dilation)
- 82 j. Calcification (of the pancreatic duct)
- 83 4. Marked and persistent exocrine insufficiency defined as pancreatic steatorrhea markedly
- 84 reduced by enzyme supplementation
- 85 5. Typical histology of an adequate histological specimen

86 Note: during initial diagnostic work-up during admission 'marked and persistent exocrine insufficiency'  
87 cannot be evaluated properly. Therefore this part of the definition of chronic pancreatitis will not be  
88 applicable during standard work-up. However, if the patient does show marked and persistent  
89 exocrine insufficiency during follow-up (either during the outpatient clinic visit after repeat  
90 transabdominal ultrasound or after the EUS), this will be considered to be diagnostic for chronic  
91 pancreatitis. The same is applicable for histology of an adequate histological specimen: this is not part  
92 of standard work-up, however, if a typical histological specimen is obtained during follow-up, this will  
93 be considered to be diagnostic for chronic pancreatitis.

94

95 Clinical recovery from acute pancreatitis: resolution of pancreatic inflammation, present when one of  
96 the following criteria is met:

- 97 1. Discharge from the hospital
- 98 2. Normal inflammation parameters in laboratory tests
- 99 3. No signs of pancreatic inflammation on imaging

100

101 Cystic fibrosis: an autosomal recessive disorder caused by a mutation in the CFTR gene, resulting in  
102 defective chloride channels in epithelial cells, diagnosed by either a concentration in sweat of chloride  
103 greater than 60 mmol/L on repeated analysis, confirmation of a CFTR gene mutation, or both (10).

104

105 Cystic fibrosis related pancreatitis: pancreatitis caused by defective ductular and acinar pancreatic  
106 secretion, diagnosed when a patient with a history of cystic fibrosis presents with an acute pancreatitis  
107 in the absence of another origin (10).

108

109 Familial pancreatitis: acute pancreatitis from any cause that occurs in a family with an incidence that  
110 is greater than would be expected by chance alone, given the size of the family and the standardized  
111 incidence of pancreatitis within the Dutch population, defined as acute pancreatitis in patients who  
112 have two or more direct blood-related family members (parents, children or siblings) who have had an  
113 episode of acute pancreatitis (11-13).

114

115 Fever: a body temperature of 38.5°C or higher.

116

117 Hereditary pancreatitis: otherwise unexplained pancreatitis in an individual from a family in which the  
118 pancreatitis phenotype appears to be inherited through a disease-causing gene mutation expressed in  
119 an autosomal dominant pattern, defined as pancreatitis in patients with a known mutation in the  
120 PRSS1 gene, the SPINK1 gene, the CFTR gene, the CTSC gene, the CLDN2 gene or the CPA1 gene, or if  
121 the patient has a direct family member (parents, children, siblings) with one or more of the above  
122 mentioned mutations and has at least one direct family member who has had an episode of acute  
123 pancreatitis or has chronic pancreatitis (13, 14).

124

125 Hypercalcemic pancreatitis: acute pancreatitis caused by hypercalcemia and diagnosed when no signs  
126 of a biliary pancreatitis are found in standard work-up and the patient has a blood serum calcium level  
127 of at least 12 mg/dl or 3 mmol/l, corrected for the serum albumin level, as first measured during  
128 admission (15).

129

130

131 Hypertriglyceridemic pancreatitis: acute pancreatitis based on hypertriglyceridemia and diagnosed if  
132 a biliary etiology is not demonstrated by standard work-up and the patient has a blood serum  
133 triglyceride level of at least 1000 mg/dl (or 11.2 mmol/l) under fasting conditions, as first measured  
134 during admission (16).

135

136 Hypothermia: a body temperature of 35.9°C or lower.

137

138 Infected (extra)pancreatic necrosis: presence of microorganisms in (extra-)pancreatic necrosis,  
139 confirmed by a positive culture obtained by means of fine needle aspiration or from the first drainage  
140 procedure or necrosectomy, the presence of gas in the (extra-)pancreatic collection on CT, or the  
141 presence of clinical signs of persistent sepsis or progressive clinical deterioration despite maximal  
142 support on the intensive care unit (ICU) without other causes for infection (ruled out should be:  
143 pneumonia, urinary tract infection, wound infection, endocarditis, abdominal sepsis or any other  
144 infection which could be suspected based on the individual patient's clinical presentation) (17).

145

146 Medication associated pancreatitis: acute pancreatitis is considered to be caused by drugs when a  
147 biliary cause is not demonstrated by standard work-up, the patient uses one or multiple drug(s) listed  
148 in table S1 in additional file 1, the drug has been started or increased in dosage within a reasonable  
149 temporal sequence, in principle 1 month before the onset of the pancreatitis, and has a positive  
150 dechallenge (a drug reaction that is confirmed by stopping the drug) (18, 19).

151

152 Microlithiasis: stones or concrements, smaller than four mm, in the gall bladder or the bile ducts (20).

153

154 Murphy's sign: the phenomenon where compression of the right upper quadrant causes the patient  
155 to catch their breath due to pain when taking a deep breath (21).

156

157 Pancreas divisum: a congenital malformation of the main pancreatic duct (Wirsung's duct) with two  
158 separate ducts (a separate ventral duct of Wirsung and a dorsal duct of Santorini) as opposed to one  
159 main duct (of Wirsung) (22).

160

161 Positive imaging: positive imaging is defined as imaging during which a definitive cause for the acute  
162 pancreatitis episode can be found; or during which abnormalities are visualized constituting a  
163 definitive cause, after obtaining tissue and pathological examination. So, if during EUS ductal  
164 abnormalities are found, yet not enough to make a certain diagnosis of chronic pancreatitis according  
165 to the M-ANNHEIM classification (8), this imaging is considered to be negative, even though it did show  
166 abnormalities. This approach is chosen because the aim of this study is to determine the rate of which  
167 EUS can find a causative factor for a previous acute pancreatitis episode. For the same reason, finding  
168 of an anatomical abnormality after a first episode of acute pancreatitis is not scored as positive  
169 imaging. An overview of the exact findings scored as positive imaging is provided in table 3 of the main  
170 manuscript.

171

172 Post-ERCP pancreatitis: pancreatitis caused by mechanical injury from instrumentation and hydrostatic  
173 injury from contrast injection during ERCP, diagnosed if a patient develops a pancreatitis within 24  
174 hours of an ERCP without indications of another origin (23).

175



176 Postoperative pancreatitis: pancreatitis caused by perioperative hypoperfusion of the pancreas,  
177 diagnosed if a patient develops a pancreatitis within 24 hours of abdominal surgery in the absence of  
178 indications for another origin (24).

179

180 Posttraumatic pancreatitis: pancreatitis caused by pancreatic injury due to trauma to the abdomen,  
181 diagnosed when the patient describes a typical blunt trauma to the upper abdomen and pancreatic  
182 trauma is visible on imaging (25).

183

184 Recurrence rate: the risk of a recurrent episode of acute pancreatitis.

185

186 Sludge: solid material which results from the slow settling of particles dispersed in bile (20).

187

188

189

190

191

192

193

194

195

196

197 Standard work-up:

## 198 1. A detailed personal and family history, including questions on:

199 a. Alcohol use

200 b. Recent ERCP

201 c. Recent start of or changes in use of drugs associated with acute pancreatitis

202 d. Recent major abdominal trauma

203 e. Recent abdominal surgery

204 f. Familial pancreatitis

205 g. Hereditary pancreatitis

206 h. Cystic fibrosis related pancreatitis

## 207 2. Laboratory tests, including:

208 a. Blood serum triglycerides level, first measured during admission

209 b. Blood serum calcium level, corrected for the serum albumin level, first measured  
210 during admission

211 c. Blood serum ALT level on admission

## 212 3. Imaging via transabdominal ultrasound, MRI or MRCP after clinical recovery

213

214 Biliary events: acute cholecystitis; biliary colic's requiring readmission; biliary pancreatitis; cholangitis;

215 or obstructive choledocholithiasis needing ERCP.

216

217 Acute cholecystitis: an acute inflammation of the gall bladder, diagnosed when one item in A, B and C

218 is present:

219 A) Local signs of inflammation

220 1. Murphy's sign, or

221 2. Right upper abdominal quadrant mass, pain or tenderness

222 B) Systemic signs of inflammation

223 1. Fever or hypothermia, or

224 2. Elevated C-reactive protein (CRP), or

225 3. Elevated white blood cell count

226 C) Imaging findings characteristic of acute cholecystitis (26, 27)

227 Note: acute cholecystitis and cholangitis (see definition below) are defined according to the Tokyo  
228 classification which defines fever as a body temperature of 38°C or higher; however, fever will be  
229 defined in this study as hyperthermia of 38.5°C or higher and hypothermia will be added as a systemic  
230 sign of inflammation, as this more accurately reflects clinical practice in the Netherlands.

231

232 Biliary colic: upper abdominal pain (either right upper quadrant or epigastric pain) lasting at least 30

233 minutes, often associated with restlessness (28).

234

235

236

237

238 Cholangitis: an inflammation of the bile duct(s), diagnosed when one item in each of the following  
239 categories is present:

240 1. Systemic inflammation

241 a. Fever, hypothermia and/or shaking chills

242 b. Laboratory data: evidence of inflammatory response (abnormal white blood cell  
243 counts (defined as smaller than 4,000/ $\mu$ l or larger than 10,000/ $\mu$ l), increase of serum  
244 CRP levels (defined as 1 mg/dl or higher), and other changes indicating inflammation)

245 2. Cholestasis

246 a. Jaundice (defined as a total bilirubin of 2 mg/dl or higher)

247 b. Laboratory data: abnormal liver function tests (increased serum alkaline phosphatase,  
248 gamma-glutamyltransferase (gamma-GT), aspartate transaminase (AST) and ALT  
249 levels (defined as more than 1.5 times the ULN))

250 3. Imaging

251 a. Biliary dilatation

252 b. Evidence of the etiology on imaging (stricture, stone, stent etc.) (26)

253

254 Obstructive choledocholithiasis: presence of gallstones, microlithiasis or biliary sludge in the CBD on  
255 imaging, requiring an ERCP, according to the treating physician.

256

## 257 References

- 258 1. Banks PA, Bollen TL, Dervenis C, Gooszen HG, Johnson CD, Sarr MG, et al. Classification of acute  
259 pancreatitis--2012: revision of the Atlanta classification and definitions by international consensus. *Gut*.  
260 2013;62(1):102-11.
- 261 2. Working Group IAP/APA Acute Pancreatitis Guidelines. IAP/APA evidence-based guidelines for the  
262 management of acute pancreatitis. *Pancreatology*. 2013;13(4 Suppl 2):e1-15.
- 263 3. Stolle M, Sack PM, Thomasius R. Binge drinking in childhood and adolescence: epidemiology,  
264 consequences, and interventions. *Dtsch Arztebl Int*. 2009;106(19):323-8.
- 265 4. Sadr Azodi O, Orsini N, Andren-Sandberg A, Wolk A. Effect of type of alcoholic beverage in causing  
266 acute pancreatitis. *Br J Surg*. 2011;98(11):1609-16.
- 267 5. Midanik LT. Drunkenness, feeling the effects and 5+ measures. *Addiction*. 1999;94(6):887- 97.
- 268 6. Ammori BJ, Boreham B, Lewis P, Roberts SA. The Biochemical Detection of Biliary Etiology of Acute  
269 Pancreatitis on Admission: A Revisit in the Modern Era of Biliary Imaging. *Pancreas*. 2003;26:e32-5.
- 270 7. Schepers NJ, Bakker OJ, Besselink MG, Bollen TL, Dijkgraaf MG, van Eijck CH, et al. Early biliary  
271 decompression versus conservative treatment in acute biliary pancreatitis (APEC trial): study protocol for a  
272 randomized controlled trial. *Trials*. 2016;17:5.
- 273 8. Schneider A, Lohr JM, Singer MV. The M-ANNHEIM classification of chronic pancreatitis: introduction  
274 of a unifying classification system based on a review of previous classifications of the disease. *J Gastroenterol*.  
275 2007;42(2):101-19.
- 276 9. Sarner M, Cotton PB. Classification of pancreatitis. *Gut*. 1984;25:756-9.
- 277 10. Ratjen F, Döring G. Cystic fibrosis. *The Lancet*. 2003;361(9358):681-9.
- 278 11. Spanier B, Bruno MJ, Dijkgraaf MG. Incidence and mortality of acute and chronic pancreatitis in the  
279 Netherlands: a nationwide record-linked cohort study for the years 1995-2005. *World J Gastroenterol*.  
280 2013;19(20):3018-26.
- 281 12. CBS StatLine. Households; size, position in household, January 1st 1995-2013 StatLine: Central Bureau  
282 for Statistics 2015 [Available from:  
283 [http://statline.cbs.nl/Statweb/publication/?VW=T&DM=SLNL&PA=37312&D1=a&D2=0,5,10,\(I-2\)-](http://statline.cbs.nl/Statweb/publication/?VW=T&DM=SLNL&PA=37312&D1=a&D2=0,5,10,(I-2)-&HD=180221-1109&HDR=G1&STB=T)  
284 [I&HD=180221-1109&HDR=G1&STB=T](http://statline.cbs.nl/Statweb/publication/?VW=T&DM=SLNL&PA=37312&D1=a&D2=0,5,10,(I-2)-&HD=180221-1109&HDR=G1&STB=T).

- 285 13. Whitcomb DC. Genetic aspects of pancreatitis. *Annu Rev Med.* 2010;61:413-24.
- 286 14. Whitcomb DC. Hereditary diseases of the pancreas. In: Yamada T AD, Kaplowitz N, Laine L, Owyang C,  
287 Powell DW, editors, editor. *Textbook of Gastroenterology.* 4th ed. Philadelphia: Lippincott Williams & Wilkins;  
288 2003. p. 2147–65.
- 289 15. Shane E, Dinaz I. Hypercalcemia: Pathogenesis, clinical manifestations, differential diagnosis and  
290 management. In: Favus M, editor. *Primer on the metabolic bone diseases and disorders of mineral metabolism.*  
291 6th ed. Philadelphia: Kippincott, Williams, and Wilkins; 2006. p. 26-176.
- 292 16. Berglund L, Brunzell JD, Goldberg AC, Goldberg IJ, Sacks F, Murad MH, et al. Evaluation and treatment  
293 of hypertriglyceridemia: an Endocrine Society clinical practice guideline. *J Clin Endocrinol Metab.*  
294 2012;97(9):2969-89.
- 295 17. van Brunschot S, van Grinsven J, van Santvoort HC, Bakker OJ, Besselink MG, Boermeester MA, et al.  
296 Endoscopic or surgical step-up approach for infected necrotising pancreatitis: a multicentre randomised trial.  
297 *The Lancet.* 2018;391(10115):51-8.
- 298 18. Nitsche C, Maertin S, Scheiber J, Ritter CA, Lerch MM, Mayerle J. Drug-induced pancreatitis. *Curr*  
299 *Gastroenterol Rep.* 2012;14(2):131-8.
- 300 19. Lankisch PG, Apte M, Banks PA. Acute pancreatitis. *The Lancet.* 2015;386(9988):85-96.
- 301 20. Jungst C, Kullak-Ublick GA, Jungst D. Gallstone disease: Microlithiasis and sludge. *Best Pract Res Clin*  
302 *Gastroenterol.* 2006;20(6):1053-62.
- 303 21. Murphy JB. The diagnosis of gall-stones. *Am Med News.* 1903;82:825.33.
- 304 22. Cotton P. Congenital anomaly of pancreas divisum as cause of obstructive pain and pancreatitis. *Gut.*  
305 1980;21:105-14.
- 306 23. Cotton PB, Lehman G, Vennes J, Geenen JE, Russell RCG, Meyers WC, et al. Endoscopic sphincterotomy  
307 complications and their management: an attempt at consensus. *Gastrointest Endosc.* 1991;37:383-93.
- 308 24. Connor S. Defining post-operative pancreatitis as a new pancreatic specific complication following  
309 pancreatic resection. *HPB (Oxford).* 2016;18(8):642-51.
- 310 25. Booth F, Flint L. Pancreatoduodenal trauma. In: ed BJ, editor. *Blunt multiple trauma.* New York: Marcel  
311 Dekker; 1990. p. 497-509.

- 312 26. Miura F, Okamoto K, Takada T, Strasberg SM, Asbun HJ, Pitt HA, et al. Tokyo Guidelines 2018: initial  
313 management of acute biliary infection and flowchart for acute cholangitis. *J Hepatobiliary Pancreat Sci.*  
314 2018;25(1):31-40.
- 315 27. Yokoe M, Takada T, Strasberg SM, Solomkin JS, Mayumi T, Gomi H, et al. TG13 diagnostic criteria and  
316 severity grading of acute cholecystitis (with videos). *Journal of Hepato-Biliary-Pancreatic Sciences.*  
317 2013;20(1):35-46.
- 318 28. French E, Robb W. Biliary and renal colic. *Br Med J.* 1963:135-8.
- 319
