# Supplementary material for: Role of endoscopic ultrasonography in the diagnostic work-up of idiopathic acute pancreatitis (PICUS): study protocol for a nationwide prospective cohort study
Source: PubMed Central journal article supplement (PMC7440829; doi:10.1136/bmjopen-2019-035504), 2020-08-20
Supplement: bmjopen-2019-035504supp003.pdf [file bmjopen-2019-035504supp003.pdf]

## Additional file 3: Short Form 36 Questionnaire

### English version

1. In general, would you say your health is:
  - excellent
  - very good
  - good
  - fair
  - poor
  
2. **Compared to one ear ago**, how would you rate your health in general **now**?
  - much better now than one year ago
  - somewhat better now than one year ago
  - about the same
  - somewhat worse now than one year ago
  - much worse now than one year ago

3. The following items are about activities you might do during a typical day.  
Does **your health now limit you** in these activities? If so, how much?

|                                                                                                            | <b>Yes, limited<br/>a lot</b> | <b>Yes, limited<br/>a little</b> | <b>No, not<br/>limited at all</b> |
|------------------------------------------------------------------------------------------------------------|-------------------------------|----------------------------------|-----------------------------------|
| a. <b>Vigorous activities</b> , such as running, lifting heavy objects, participating in strenuous sports  | <input type="checkbox"/>      | <input type="checkbox"/>         | <input type="checkbox"/>          |
| b. <b>Moderate activities</b> , such as moving a table, pushing a vacuum cleaner, bowling, or playing golf | <input type="checkbox"/>      | <input type="checkbox"/>         | <input type="checkbox"/>          |
| c. Lifting or carrying groceries                                                                           | <input type="checkbox"/>      | <input type="checkbox"/>         | <input type="checkbox"/>          |
| d. Climbing <b>several</b> flights of stairs                                                               | <input type="checkbox"/>      | <input type="checkbox"/>         | <input type="checkbox"/>          |
| e. Climbing <b>one</b> flight of stairs                                                                    | <input type="checkbox"/>      | <input type="checkbox"/>         | <input type="checkbox"/>          |
| f. Bending, kneeling, or stooping                                                                          | <input type="checkbox"/>      | <input type="checkbox"/>         | <input type="checkbox"/>          |
| g. Walking <b>more than a mile</b>                                                                         | <input type="checkbox"/>      | <input type="checkbox"/>         | <input type="checkbox"/>          |
| h. Walking <b>several blocks</b>                                                                           | <input type="checkbox"/>      | <input type="checkbox"/>         | <input type="checkbox"/>          |
| i. Walking <b>one block</b>                                                                                | <input type="checkbox"/>      | <input type="checkbox"/>         | <input type="checkbox"/>          |
| j. Bathing or dressing yourself                                                                            | <input type="checkbox"/>      | <input type="checkbox"/>         | <input type="checkbox"/>          |

4. During the **past 4 weeks**, have you had any of the following problems with your work or other regular daily activities **as a result of your physical health?**

|                                                                                                      | Yes                      | No                       |
|------------------------------------------------------------------------------------------------------|--------------------------|--------------------------|
| a. Cut down the <b>amount of time</b> you spent on work or other activities                          | <input type="checkbox"/> | <input type="checkbox"/> |
| b. <b>Accomplished less</b> than you would like                                                      | <input type="checkbox"/> | <input type="checkbox"/> |
| c. Were limited in the <b>kind</b> of work or other activities                                       | <input type="checkbox"/> | <input type="checkbox"/> |
| d. Had <b>difficulty</b> performing the work or other activities (for example, it took extra effort) | <input type="checkbox"/> | <input type="checkbox"/> |

5. During the **past 4 weeks**, have you had any of the following problems with your work or other regular daily activities **as a result of any emotional problems** (such as feeling depressed or anxious)?

|                                                                             | Yes                      | No                       |
|-----------------------------------------------------------------------------|--------------------------|--------------------------|
| a. Cut down the <b>amount of time</b> you spent on work or other activities | <input type="checkbox"/> | <input type="checkbox"/> |
| b. <b>Accomplished less</b> than you would like                             | <input type="checkbox"/> | <input type="checkbox"/> |
| c. Didn't do work or other activities as <b>carefully</b> as usual          | <input type="checkbox"/> | <input type="checkbox"/> |

6. During the **past 4 weeks**, to what extent has your physical health or emotional problems interfered with your normal social activities with family, friends, neighbors, or groups?
- not at all
  - slightly
  - moderately
  - quite a bit
  - extremely
7. How much **bodily** pain have you had during the **past 4 weeks**?
- none
  - very mild
  - mild
  - moderate
  - severe
  - very severe
8. During the **past 4 weeks**, how much did **pain** interfere with your normal work (including both work outside the home and housework)?
- not at all
  - a little bit
  - moderately
  - quite a bit
  - extremely

9. These questions are about how you feel and how things have been with you **during the past 4 weeks**. For each question, please give the one answer that comes closest to the way you have been feeling.

| How much of the time during the <b>past 4 weeks</b> ...                | <b>All of the time</b>   | <b>Most of the time</b>  | <b>A good bit of the time</b> | <b>Some of the time</b>  | <b>A little of the time</b> | <b>None of the time</b>  |
|------------------------------------------------------------------------|--------------------------|--------------------------|-------------------------------|--------------------------|-----------------------------|--------------------------|
| a. Did you feel full of pep?                                           | <input type="checkbox"/> | <input type="checkbox"/> | <input type="checkbox"/>      | <input type="checkbox"/> | <input type="checkbox"/>    | <input type="checkbox"/> |
| b. Have you been a very nervous person?                                | <input type="checkbox"/> | <input type="checkbox"/> | <input type="checkbox"/>      | <input type="checkbox"/> | <input type="checkbox"/>    | <input type="checkbox"/> |
| c. Have you felt so down in the dumps that nothing could cheer you up? | <input type="checkbox"/> | <input type="checkbox"/> | <input type="checkbox"/>      | <input type="checkbox"/> | <input type="checkbox"/>    | <input type="checkbox"/> |
| d. Have you felt calm and peaceful?                                    | <input type="checkbox"/> | <input type="checkbox"/> | <input type="checkbox"/>      | <input type="checkbox"/> | <input type="checkbox"/>    | <input type="checkbox"/> |
| e. Did you have a lot of energy?                                       | <input type="checkbox"/> | <input type="checkbox"/> | <input type="checkbox"/>      | <input type="checkbox"/> | <input type="checkbox"/>    | <input type="checkbox"/> |
| f. Have you felt downhearted and blue?                                 | <input type="checkbox"/> | <input type="checkbox"/> | <input type="checkbox"/>      | <input type="checkbox"/> | <input type="checkbox"/>    | <input type="checkbox"/> |
| g. Did you feel worn out?                                              | <input type="checkbox"/> | <input type="checkbox"/> | <input type="checkbox"/>      | <input type="checkbox"/> | <input type="checkbox"/>    | <input type="checkbox"/> |
| h. Have you been a happy person?                                       | <input type="checkbox"/> | <input type="checkbox"/> | <input type="checkbox"/>      | <input type="checkbox"/> | <input type="checkbox"/>    | <input type="checkbox"/> |
| i. Did you feel tired?                                                 | <input type="checkbox"/> | <input type="checkbox"/> | <input type="checkbox"/>      | <input type="checkbox"/> | <input type="checkbox"/>    | <input type="checkbox"/> |

10. During the **past 4 weeks**, how much of the time has **your physical health or emotional problems** interfered with your social activities (like visiting with friends, relatives, etc.)?
- all of the time
- most of the time
- some of the time
- a little of the time
- none of the time

11. How TRUE or FALSE is **each** of the following statements for you?

|                                                          | <b>Definitely<br/>true</b> | <b>Mostly<br/>true</b>   | <b>Don't<br/>know</b>    | <b>Mostly<br/>false</b>  | <b>Definitely<br/>false</b> |
|----------------------------------------------------------|----------------------------|--------------------------|--------------------------|--------------------------|-----------------------------|
| a. I seem to get sick a little easier than other people. | <input type="checkbox"/>   | <input type="checkbox"/> | <input type="checkbox"/> | <input type="checkbox"/> | <input type="checkbox"/>    |
| b. I am as healthy as anybody I know.                    | <input type="checkbox"/>   | <input type="checkbox"/> | <input type="checkbox"/> | <input type="checkbox"/> | <input type="checkbox"/>    |
| c. I expect my health to get worse.                      | <input type="checkbox"/>   | <input type="checkbox"/> | <input type="checkbox"/> | <input type="checkbox"/> | <input type="checkbox"/>    |
| d. My health is excellent.                               | <input type="checkbox"/>   | <input type="checkbox"/> | <input type="checkbox"/> | <input type="checkbox"/> | <input type="checkbox"/>    |

**Space for additional remarks with the questionnaire:**

## Dutch version

1. Wat vindt u, over het algemeen genomen, van uw gezondheid?
- uitstekend
  - zeer goed
  - goed
  - matig
  - slecht
2. In vergelijking met 1 jaar geleden, hoe zou u nu uw gezondheid in het algemeen beoordelen?
- veel beter dan een jaar geleden
  - iets beter dan een jaar geleden
  - ongeveer hetzelfde als een jaar geleden
  - iets slechter dan een jaar geleden
  - veel slechter dan een jaar geleden

3. De volgende vragen gaan over dagelijkse bezigheden. Wordt u door **uw gezondheid op dit moment** beperkt bij deze bezigheden? Zo ja, in welke mate?

|                                                                                           | <b>Ja, ernstig</b>       | <b>Ja, een beetje beperkt</b> | <b>Nee, helemaal niet beperkt</b> |
|-------------------------------------------------------------------------------------------|--------------------------|-------------------------------|-----------------------------------|
| a. <i>Forse inspanning</i> (zoals hardlopen, zware voorwerpen tillen, inspannend sporten) | <input type="checkbox"/> | <input type="checkbox"/>      | <input type="checkbox"/>          |
| b. <i>Matige inspanning</i> (zoals het verplaatsen van een tafel, stofzuigen, fietsen)    | <input type="checkbox"/> | <input type="checkbox"/>      | <input type="checkbox"/>          |
| c. Tillen of boodschappen dragen                                                          | <input type="checkbox"/> | <input type="checkbox"/>      | <input type="checkbox"/>          |
| d. <i>Een paar</i> trappen oplopen                                                        | <input type="checkbox"/> | <input type="checkbox"/>      | <input type="checkbox"/>          |
| e. <i>Eén</i> trap oplopen                                                                | <input type="checkbox"/> | <input type="checkbox"/>      | <input type="checkbox"/>          |
| f. Buigen, knielen of bukken                                                              | <input type="checkbox"/> | <input type="checkbox"/>      | <input type="checkbox"/>          |
| g. <i>Meer dan een kilometer</i> lopen                                                    | <input type="checkbox"/> | <input type="checkbox"/>      | <input type="checkbox"/>          |
| h. Een halve kilometer lopen                                                              | <input type="checkbox"/> | <input type="checkbox"/>      | <input type="checkbox"/>          |
| i. <i>Honderd meter</i> lopen                                                             | <input type="checkbox"/> | <input type="checkbox"/>      | <input type="checkbox"/>          |
| j. Uzelf wassen of aankleden                                                              | <input type="checkbox"/> | <input type="checkbox"/>      | <input type="checkbox"/>          |



4. Had u, ten gevolge van uw **lichamelijke gezondheid**, *de afgelopen 4 weken één van de volgende problemen bij uw werk of andere bezigheden?*

|                                                                                                 | Ja                       | Nee                      |
|-------------------------------------------------------------------------------------------------|--------------------------|--------------------------|
| a. U heeft <i>minder tijd</i> kunnen besteden aan werk of andere bezigheden.                    | <input type="checkbox"/> | <input type="checkbox"/> |
| b. U heeft <i>minder bereikt</i> dan u zou willen.                                              | <input type="checkbox"/> | <input type="checkbox"/> |
| c. U was beperkt in het <i>soort</i> werk of soort bezigheden.                                  | <input type="checkbox"/> | <input type="checkbox"/> |
| d. U had moeite met het werk of andere bezigheden (het kostte u bijvoorbeeld extra inspanning). | <input type="checkbox"/> | <input type="checkbox"/> |

5. Had u, ten gevolge van een **emotioneel probleem** (bijvoorbeeld doordat u zich depressief of angstig voelde), *de afgelopen 4 weken één van de volgende problemen bij uw werk of andere bezigheden?*

|                                                                                       | Ja                       | Nee                      |
|---------------------------------------------------------------------------------------|--------------------------|--------------------------|
| a. U heeft <i>minder tijd</i> kunnen besteden aan werk of andere bezigheden.          | <input type="checkbox"/> | <input type="checkbox"/> |
| b. U heeft <i>minder bereikt</i> dan u zou willen.                                    | <input type="checkbox"/> | <input type="checkbox"/> |
| c. U heeft het werk of andere bezigheden niet zo zorgvuldig gedaan als u gewend bent. | <input type="checkbox"/> | <input type="checkbox"/> |

6. In hoeverre heeft uw **lichamelijke gezondheid** of hebben uw **emotionele problemen** u *de afgelopen 4 weken* belemmerd in uw normale sociale bezigheden met gezin, vrienden, burens of anderen?
- helemaal niet
- enigszins
- nogal
- veel
- heel erg veel
7. Hoeveel **pijn** had u *de afgelopen 4 weken*?
- geen
- heel licht
- licht
- nogal
- ernstig
- heel ernstig
8. In welke mate heeft **pijn** u *de afgelopen 4 weken* belemmerd bij uw normale werkzaamheden (zowel werk buitenshuis als huishoudelijk werk)?
- helemaal niet
- enigszins
- nogal
- veel
- heel erg veel

12. De volgende vragen gaan over hoe u zich *de afgelopen 4 weken* heeft **gevoeld**. Wilt u bij elke vraag het antwoord aankruisen dat het beste aansluit bij hoe u zich heeft gevoeld?

Hoe vaak  
gedurende *de  
afgelopen 4  
weken*:

|                                                        | <b>Voortdurend</b>       | <b>Meestal</b>           | <b>Vaak</b>              | <b>Soms</b>              | <b>Zelden</b>            | <b>Nooit</b>             |
|--------------------------------------------------------|--------------------------|--------------------------|--------------------------|--------------------------|--------------------------|--------------------------|
| a. voelde u zich levenslustig?                         | <input type="checkbox"/> | <input type="checkbox"/> | <input type="checkbox"/> | <input type="checkbox"/> | <input type="checkbox"/> | <input type="checkbox"/> |
| b. voelde u zich erg zenuwachtig?                      | <input type="checkbox"/> | <input type="checkbox"/> | <input type="checkbox"/> | <input type="checkbox"/> | <input type="checkbox"/> | <input type="checkbox"/> |
| c. zat u zo erg in de put dat niets u kon opvrolijken? | <input type="checkbox"/> | <input type="checkbox"/> | <input type="checkbox"/> | <input type="checkbox"/> | <input type="checkbox"/> | <input type="checkbox"/> |
| d. voelde u zich kalm en rustig?                       | <input type="checkbox"/> | <input type="checkbox"/> | <input type="checkbox"/> | <input type="checkbox"/> | <input type="checkbox"/> | <input type="checkbox"/> |
| e. voelde u zich erg energiek?                         | <input type="checkbox"/> | <input type="checkbox"/> | <input type="checkbox"/> | <input type="checkbox"/> | <input type="checkbox"/> | <input type="checkbox"/> |
| f. voelde u zich neerslachtig en somber?               | <input type="checkbox"/> | <input type="checkbox"/> | <input type="checkbox"/> | <input type="checkbox"/> | <input type="checkbox"/> | <input type="checkbox"/> |
| g. voelde u zich uitgeblust?                           | <input type="checkbox"/> | <input type="checkbox"/> | <input type="checkbox"/> | <input type="checkbox"/> | <input type="checkbox"/> | <input type="checkbox"/> |
| h. voelde u zich gelukkig?                             | <input type="checkbox"/> | <input type="checkbox"/> | <input type="checkbox"/> | <input type="checkbox"/> | <input type="checkbox"/> | <input type="checkbox"/> |
| i. voelde u zich moe?                                  | <input type="checkbox"/> | <input type="checkbox"/> | <input type="checkbox"/> | <input type="checkbox"/> | <input type="checkbox"/> | <input type="checkbox"/> |

10. Hoe vaak hebben uw **lichamelijke gezondheid of emotionele problemen** gedurende de afgelopen 4 weken uw sociale activiteiten (zoals bezoek aan vrienden of naaste familieleden) belemmerd?
- voortdurend
- meestal
- soms
- zelden
- nooit

11. Wilt u het antwoord kiezen dat het beste weergeeft hoe juist of onjuist u elk van de volgende uitspraken voor uzelf vindt?

|                                                            | Volkomen<br>juist        | Grotendeels<br>juist     | Weet<br>ik<br>niet       | Grotendeels<br>onjuist   | Volkomen<br>onjuist      |
|------------------------------------------------------------|--------------------------|--------------------------|--------------------------|--------------------------|--------------------------|
| a. Ik lijk gemakkelijker ziek te worden dan andere mensen. | <input type="checkbox"/> | <input type="checkbox"/> | <input type="checkbox"/> | <input type="checkbox"/> | <input type="checkbox"/> |
| b. Ik ben net zo gezond als andere mensen die ik ken.      | <input type="checkbox"/> | <input type="checkbox"/> | <input type="checkbox"/> | <input type="checkbox"/> | <input type="checkbox"/> |
| c. Ik verwacht dat mijn gezondheid achteruit zal gaan.     | <input type="checkbox"/> | <input type="checkbox"/> | <input type="checkbox"/> | <input type="checkbox"/> | <input type="checkbox"/> |
| d. Mijn gezondheid is uitstekend.                          | <input type="checkbox"/> | <input type="checkbox"/> | <input type="checkbox"/> | <input type="checkbox"/> | <input type="checkbox"/> |

**Ruimte voor aanvullende opmerkingen bij de vragenlijst:**
